# Supplementary material for: 文化生産物としての「フリーター」--フリーターの「誕生」とその社会的背景
Source: Oxford University Press journal article supplement (doi:10.1158/1078-0432.ccr-20-4189), 2004-01-01
Supplement: 10780432ccr204189-sup-254418_2_supp_6847307_qmy4c0.xlsx [file 10780432ccr204189-sup-254418_2_supp_6847307_qmy4c0.xlsx]

## Sheet: cBioportal data
Sample ID	Gender	Detailed Cancer Type	Primary or Metastatic	Metastatic Site	Simplified Metastatic Site	Run	Age-at-Initial-Dx	Dead	Days-From-Dx-to-Death-Last-FU	DMT Primary Site	DMT Primary Site, Classified	Ulceration: Yes/No/Unknown? NA if ocular, primary CNS, or unknown primary	Matched 2L+ Tx via IMPACT?	DriverClass	1stLinePD-1Subset? 0=no, 1=yes	1LPD1Agent	ImmuneTxClass	Immune Tx Fail? 0=no, 1=yes	Dead? 0=no, 1=yes	TFFS (mo)	OS (mo)	Age_Start_Immune_Tx	ECOG	LDH	LDH Ratio	LDH Abnl (0=no, 1=yes)	NLR (neutrophil to lymphocyte ratio)	NLR >4.73? (0=no, 1=yes, Unknown)	REC >=1.5% if mono tx (0=no, 1=yes, 9=not mono)	RLC >=17.5% if mono tx (0=no, 1=yes, 9=not mono)	LungMets?	CNSmets?	Bonemets?	Liver Mets (0= no, 1 = yes)	AJCC 7th	AJCC 8th
P-0000596-T01-IM3	Male	Melanoma of Unknown Primary	Metastasis	Parotid Gland	LR / In-Transit / Regional LN	IMPACTv3-CLIN-20140042	70.7	0	1703	Unknown Primary	8	NA	0	NF1	0	#N/A	#N/A	#N/A	#N/A	#N/A	#N/A	#N/A	#N/A	#N/A	#N/A	#N/A	#N/A	#N/A	#N/A	#N/A	#N/A	#N/A	#N/A	#N/A	#N/A	#N/A
P-0000646-T02-IM3	Male	Cutaneous Melanoma	Metastasis	Lymph node, Regional	LR / In-Transit / Regional LN	IMPACTv3-CLIN-2014068R	54.5	0	10744	Skin, trunk	2	Unknown	0	BRAF_CLASS_2_3	0	#N/A	#N/A	#N/A	#N/A	#N/A	#N/A	#N/A	#N/A	#N/A	#N/A	#N/A	#N/A	#N/A	#N/A	#N/A	#N/A	#N/A	#N/A	#N/A	#N/A	#N/A
P-0000686-T01-IM3	Male	Cutaneous Melanoma	Metastasis	Liver	Liver	IMPACTv3-CLIN-20140048	74	0	3351	Skin, face	1	No	0	NF1	0	#N/A	#N/A	#N/A	#N/A	#N/A	#N/A	#N/A	#N/A	#N/A	#N/A	#N/A	#N/A	#N/A	#N/A	#N/A	#N/A	#N/A	#N/A	#N/A	#N/A	#N/A
P-0000697-T01-IM3	Female	Cutaneous Melanoma	Metastasis	Lymph Node, Non-Regional	Soft Tissue / Distant LN	IMPACTv3-CLIN-20140049	58.8	1	5943	Skin, arm/shoulder	3	Unknown	0	NF1	0	#N/A	#N/A	#N/A	#N/A	#N/A	#N/A	#N/A	#N/A	#N/A	#N/A	#N/A	#N/A	#N/A	#N/A	#N/A	#N/A	#N/A	#N/A	#N/A	#N/A	#N/A
P-0000865-T01-IM3	Female	Cutaneous Melanoma	Metastasis	Lymph node, Regional	LR / In-Transit / Regional LN	IMPACTv3-CLIN-20140060	75.7	1	2806	Skin, leg/hip	4	Yes	0	NRAS_Q61	0	#N/A	#N/A	#N/A	#N/A	#N/A	#N/A	#N/A	#N/A	#N/A	#N/A	#N/A	#N/A	#N/A	#N/A	#N/A	#N/A	#N/A	#N/A	#N/A	#N/A	#N/A
P-0000893-T01-IM3	Male	Cutaneous Melanoma	Metastasis	Lymph Node, Non-Regional	Soft Tissue / Distant LN	IMPACTv3-CLIN-20140063	78.6	1	5202	Skin, Site Unspecified	2	Yes	0	Other_Driver	0	#N/A	#N/A	#N/A	#N/A	#N/A	#N/A	#N/A	#N/A	#N/A	#N/A	#N/A	#N/A	#N/A	#N/A	#N/A	#N/A	#N/A	#N/A	#N/A	#N/A	#N/A
P-0000895-T01-IM3	Male	Melanoma of Unknown Primary	Metastasis	Lymph Node, Non-Regional	Soft Tissue / Distant LN	IMPACTv3-CLIN-20140063	63.8	1	1233	Unknown Primary	8	NA	1	NRAS_Q61	0	#N/A	#N/A	#N/A	#N/A	#N/A	#N/A	#N/A	#N/A	#N/A	#N/A	#N/A	#N/A	#N/A	#N/A	#N/A	#N/A	#N/A	#N/A	#N/A	#N/A	#N/A
P-0000898-T01-IM3	Male	Cutaneous Melanoma	Metastasis	In-transit	LR / In-Transit / Regional LN	IMPACTv3-CLIN-20140063	51.2	1	1644	Skin, trunk	2	Yes	0	BRAF_CLASS_1_V600E	0	#N/A	#N/A	#N/A	#N/A	#N/A	#N/A	#N/A	#N/A	#N/A	#N/A	#N/A	#N/A	#N/A	#N/A	#N/A	#N/A	#N/A	#N/A	#N/A	#N/A	#N/A
P-0000922-T01-IM3	Male	Cutaneous Melanoma	Metastasis	Adrenal Gland	Other Visceral	IMPACTv3-CLIN-20140065	39.1	1	4714	Skin, trunk	2	Unknown	0	BRAF_CLASS_1_V600E	0	#N/A	#N/A	#N/A	#N/A	#N/A	#N/A	#N/A	#N/A	#N/A	#N/A	#N/A	#N/A	#N/A	#N/A	#N/A	#N/A	#N/A	#N/A	#N/A	#N/A	#N/A
P-0000958-T01-IM3	Female	Cutaneous Melanoma	Primary	Not Applicable	NA	IMPACTv3-CLIN-20140067	15.5	0	1740	Skin, trunk	2	No	0	BRAF_CLASS_1_V600E	0	#N/A	#N/A	#N/A	#N/A	#N/A	#N/A	#N/A	#N/A	#N/A	#N/A	#N/A	#N/A	#N/A	#N/A	#N/A	#N/A	#N/A	#N/A	#N/A	#N/A	#N/A
P-0001081-T01-IM3	Female	Cutaneous Melanoma	Metastasis	Ovary	Other Visceral	IMPACTv3-CLIN-20140077	47.5	0	3334	Skin, arm/shoulder	3	No	0	Other_Driver	0	#N/A	#N/A	#N/A	#N/A	#N/A	#N/A	#N/A	#N/A	#N/A	#N/A	#N/A	#N/A	#N/A	#N/A	#N/A	#N/A	#N/A	#N/A	#N/A	#N/A	#N/A
P-0001251-T01-IM3	Female	Melanoma of Unknown Primary	Metastasis	Brain	Brain	IMPACTv3-CLIN-20140090	65.5	1	475	Unknown Primary	8	NA	0	NF1	0	#N/A	#N/A	#N/A	#N/A	#N/A	#N/A	#N/A	#N/A	#N/A	#N/A	#N/A	#N/A	#N/A	#N/A	#N/A	#N/A	#N/A	#N/A	#N/A	#N/A	#N/A
P-0001361-T01-IM3	Male	Cutaneous Melanoma	Metastasis	Parotid Gland	LR / In-Transit / Regional LN	IMPACTv3-CLIN-20140099	68.6	1	1596	Skin, face	1	No	0	Unknown_Driver	0	#N/A	#N/A	#N/A	#N/A	#N/A	#N/A	#N/A	#N/A	#N/A	#N/A	#N/A	#N/A	#N/A	#N/A	#N/A	#N/A	#N/A	#N/A	#N/A	#N/A	#N/A
P-0001485-T01-IM3	Male	Cutaneous Melanoma	Metastasis	Brain	Brain	IMPACTv3-CLIN-20140107	58.3	1	5085	Skin, external ear	1	No	0	NF1	0	#N/A	#N/A	#N/A	#N/A	#N/A	#N/A	#N/A	#N/A	#N/A	#N/A	#N/A	#N/A	#N/A	#N/A	#N/A	#N/A	#N/A	#N/A	#N/A	#N/A	#N/A
P-0001530-T01-IM3	Male	Cutaneous Melanoma	Metastasis	Brain	Brain	IMPACTv3-CLIN-20140111	79.5	1	1318	Skin, leg/hip	4	Unknown	0	NRAS_Q61	0	#N/A	#N/A	#N/A	#N/A	#N/A	#N/A	#N/A	#N/A	#N/A	#N/A	#N/A	#N/A	#N/A	#N/A	#N/A	#N/A	#N/A	#N/A	#N/A	#N/A	#N/A
P-0001560-T01-IM3	Male	Cutaneous Melanoma	Metastasis	Lung	Lung	IMPACTv3-CLIN-20140113	63.9	0	1838	Skin, arm/shoulder	3	Unknown	0	NRAS_Q61	0	#N/A	#N/A	#N/A	#N/A	#N/A	#N/A	#N/A	#N/A	#N/A	#N/A	#N/A	#N/A	#N/A	#N/A	#N/A	#N/A	#N/A	#N/A	#N/A	#N/A	#N/A
P-0001603-T01-IM3	Male	Cutaneous Melanoma	Metastasis	In-transit	LR / In-Transit / Regional LN	IMPACTv3-CLIN-20140117	56.5	0	3086	Skin, trunk	2	No	0	NRAS_Q61	0	#N/A	#N/A	#N/A	#N/A	#N/A	#N/A	#N/A	#N/A	#N/A	#N/A	#N/A	#N/A	#N/A	#N/A	#N/A	#N/A	#N/A	#N/A	#N/A	#N/A	#N/A
P-0001646-T01-IM3	Female	Cutaneous Melanoma	Metastasis	Stomach	Other Visceral	IMPACTv3-CLIN-20140120	54	1	2876	Skin, trunk	2	Yes	0	BRAF_CLASS_1_V600E	0	#N/A	#N/A	#N/A	#N/A	#N/A	#N/A	#N/A	#N/A	#N/A	#N/A	#N/A	#N/A	#N/A	#N/A	#N/A	#N/A	#N/A	#N/A	#N/A	#N/A	#N/A
P-0001706-T01-IM3	Male	Cutaneous Melanoma	Metastasis	In-transit	LR / In-Transit / Regional LN	IMPACTv3-CLIN-20140124	40.5	1	1917	Skin, leg/hip	4	No	1	NRAS_Q61	0	#N/A	#N/A	#N/A	#N/A	#N/A	#N/A	#N/A	#N/A	#N/A	#N/A	#N/A	#N/A	#N/A	#N/A	#N/A	#N/A	#N/A	#N/A	#N/A	#N/A	#N/A
P-0001710-T01-IM3	Male	Cutaneous Melanoma	Metastasis	Lymph Node, Regional	LR / In-Transit / Regional LN	IMPACTv3-CLIN-20140125	45.8	0	8315	Skin, trunk	2	Unknown	0	BRAF_CLASS_1_V600E	0	#N/A	#N/A	#N/A	#N/A	#N/A	#N/A	#N/A	#N/A	#N/A	#N/A	#N/A	#N/A	#N/A	#N/A	#N/A	#N/A	#N/A	#N/A	#N/A	#N/A	#N/A
P-0001756-T01-IM3	Male	Cutaneous Melanoma	Primary	Not Applicable	NA	IMPACTv3-CLIN-20140129	72.7	1	1681	Skin, scalp	1	Yes	0	NF1	0	#N/A	#N/A	#N/A	#N/A	#N/A	#N/A	#N/A	#N/A	#N/A	#N/A	#N/A	#N/A	#N/A	#N/A	#N/A	#N/A	#N/A	#N/A	#N/A	#N/A	#N/A
P-0001773-T01-IM3	Male	Cutaneous Melanoma	Metastasis	Soft Tissue	Soft Tissue / Distant LN	IMPACTv3-CLIN-201400130R	65	1	6793	Skin, arm/shoulder	3	Unknown	0	BRAF_CLASS_1_V600E	0	#N/A	#N/A	#N/A	#N/A	#N/A	#N/A	#N/A	#N/A	#N/A	#N/A	#N/A	#N/A	#N/A	#N/A	#N/A	#N/A	#N/A	#N/A	#N/A	#N/A	#N/A
P-0001841-T01-IM3	Male	Cutaneous Melanoma	Metastasis	Lymph Node, Non-Regional	Soft Tissue / Distant LN	IMPACTv3-CLIN-20140135	59.6	1	838	Skin, scalp	1	Yes	0	BRAF_CLASS_1_Other	0	#N/A	#N/A	#N/A	#N/A	#N/A	#N/A	#N/A	#N/A	#N/A	#N/A	#N/A	#N/A	#N/A	#N/A	#N/A	#N/A	#N/A	#N/A	#N/A	#N/A	#N/A
P-0001901-T01-IM3	Female	Cutaneous Melanoma	Metastasis	Lung	Lung	IMPACTv3-CLIN-20140142	62.9	0	3443	Skin, trunk	2	No	0	NRAS_Q61	1	Pembrolizumab	PD-1 Mono	0	0	45.337	45.337	69	0	Unknown	Unknown	Unknown	Unknown	Unknown	Unknown	Unknown	1	0	0	0	M1b	M1b
P-0002018-T01-IM3	Female	Melanoma of Unknown Primary	Metastasis	Soft Tissue	Soft Tissue / Distant LN	IMPACTv3-CLIN-20140153	35.8	1	261	Unknown Primary	8	NA	0	BRAF_CLASS_1_V600E	0	#N/A	#N/A	#N/A	#N/A	#N/A	#N/A	#N/A	#N/A	#N/A	#N/A	#N/A	#N/A	#N/A	#N/A	#N/A	#N/A	#N/A	#N/A	#N/A	#N/A	#N/A
P-0002157-T01-IM3	Female	Cutaneous Melanoma	Metastasis	Lung	Lung	IMPACTv3-CLIN-20140159	71	1	3960	Skin, face	1	Unknown	0	Other_Driver	0	#N/A	#N/A	#N/A	#N/A	#N/A	#N/A	#N/A	#N/A	#N/A	#N/A	#N/A	#N/A	#N/A	#N/A	#N/A	#N/A	#N/A	#N/A	#N/A	#N/A	#N/A
P-0002182-T01-IM3	Female	Cutaneous Melanoma	Metastasis	Lymph Node, Non-Regional	Soft Tissue / Distant LN	IMPACTv3-CLIN-20140161	68.2	1	1192	Skin, trunk	2	Yes	1	Unknown_Driver	0	#N/A	#N/A	#N/A	#N/A	#N/A	#N/A	#N/A	#N/A	#N/A	#N/A	#N/A	#N/A	#N/A	#N/A	#N/A	#N/A	#N/A	#N/A	#N/A	#N/A	#N/A
P-0002353-T01-IM3	Female	Cutaneous Melanoma	Metastasis	Soft Tissue	Soft Tissue / Distant LN	IMPACTv3-CLIN-20140173	19.3	1	10071	Skin, arm/shoulder	3	Unknown	0	NRAS_Q61	0	#N/A	#N/A	#N/A	#N/A	#N/A	#N/A	#N/A	#N/A	#N/A	#N/A	#N/A	#N/A	#N/A	#N/A	#N/A	#N/A	#N/A	#N/A	#N/A	#N/A	#N/A
P-0002380-T01-IM3	Female	Melanoma of Unknown Primary	Metastasis	Lymph node, Regional	LR / In-Transit / Regional LN	IMPACTv3-CLIN-20140175	50.3	1	1438	Unknown Primary	8	NA	0	BRAF_CLASS_1_V600E	0	#N/A	#N/A	#N/A	#N/A	#N/A	#N/A	#N/A	#N/A	#N/A	#N/A	#N/A	#N/A	#N/A	#N/A	#N/A	#N/A	#N/A	#N/A	#N/A	#N/A	#N/A
P-0002418-T01-IM3	Female	Melanoma of Unknown Primary	Metastasis	Retroperitoneal Mass	Soft Tissue / Distant LN	IMPACTv3-CLIN-20140178	28.9	1	1720	Unknown Primary	8	NA	1	Other_Driver	0	#N/A	#N/A	#N/A	#N/A	#N/A	#N/A	#N/A	#N/A	#N/A	#N/A	#N/A	#N/A	#N/A	#N/A	#N/A	#N/A	#N/A	#N/A	#N/A	#N/A	#N/A
P-0002437-T01-IM3	Female	Melanoma of Unknown Primary	Metastasis	Lymph Node, Non-Regional	Soft Tissue / Distant LN	IMPACTv3-CLIN-20140179	70.6	1	115	Unknown Primary	8	NA	0	BRAF_CLASS_1_V600E	0	#N/A	#N/A	#N/A	#N/A	#N/A	#N/A	#N/A	#N/A	#N/A	#N/A	#N/A	#N/A	#N/A	#N/A	#N/A	#N/A	#N/A	#N/A	#N/A	#N/A	#N/A
P-0002440-T01-IM3	Female	Cutaneous Melanoma	Metastasis	Lung	Lung	IMPACTv3-CLIN-20140179	50.2	0	7232	Skin, arm/shoulder	3	No	0	NRAS_Q61	0	#N/A	#N/A	#N/A	#N/A	#N/A	#N/A	#N/A	#N/A	#N/A	#N/A	#N/A	#N/A	#N/A	#N/A	#N/A	#N/A	#N/A	#N/A	#N/A	#N/A	#N/A
P-0002490-T01-IM3	Male	Melanoma of Unknown Primary	Metastasis	Lung	Lung	IMPACTv3-CLIN-20140185	70.5	1	1364	Unknown Primary	8	NA	0	RAS_OTHER	0	#N/A	#N/A	#N/A	#N/A	#N/A	#N/A	#N/A	#N/A	#N/A	#N/A	#N/A	#N/A	#N/A	#N/A	#N/A	#N/A	#N/A	#N/A	#N/A	#N/A	#N/A
P-0002504-T01-IM3	Male	Melanoma of Unknown Primary	Metastasis	Lung	Lung		66.3	1	922	Unknown Primary	8	NA	0	NF1	0	#N/A	#N/A	#N/A	#N/A	#N/A	#N/A	#N/A	#N/A	#N/A	#N/A	#N/A	#N/A	#N/A	#N/A	#N/A	#N/A	#N/A	#N/A	#N/A	#N/A	#N/A
P-0002706-T01-IM3	Female	Cutaneous Melanoma	Metastasis	Brain	Brain	IMPACTv3-CLIN-20140202	60.5	1	3720	Skin, leg/hip	4	No	0	Unknown_Driver	0	#N/A	#N/A	#N/A	#N/A	#N/A	#N/A	#N/A	#N/A	#N/A	#N/A	#N/A	#N/A	#N/A	#N/A	#N/A	#N/A	#N/A	#N/A	#N/A	#N/A	#N/A
P-0002765-T01-IM3	Male	Cutaneous Melanoma	Metastasis	Lymph node, Regional	LR / In-Transit / Regional LN	IMPACTv3-CLIN-20140199-R	38.8	1	5104	Skin, trunk	2	No	0	BRAF_CLASS_1_V600E	0	#N/A	#N/A	#N/A	#N/A	#N/A	#N/A	#N/A	#N/A	#N/A	#N/A	#N/A	#N/A	#N/A	#N/A	#N/A	#N/A	#N/A	#N/A	#N/A	#N/A	#N/A
P-0002832-T01-IM3	Male	Cutaneous Melanoma	Metastasis	Lymph node, Regional	LR / In-Transit / Regional LN	IMPACTv3-CLIN-20150003	32.1	0	2462	Skin, trunk	2	No	0	BRAF_CLASS_2_3	0	#N/A	#N/A	#N/A	#N/A	#N/A	#N/A	#N/A	#N/A	#N/A	#N/A	#N/A	#N/A	#N/A	#N/A	#N/A	#N/A	#N/A	#N/A	#N/A	#N/A	#N/A
P-0003010-T01-IM3	Female	Cutaneous Melanoma	Metastasis	Lymph node, Regional	LR / In-Transit / Regional LN	IMPACTv3-CLIN-20150014R	29.5	1	3831	Skin, leg/hip	4	No	0	Other_Driver	0	#N/A	#N/A	#N/A	#N/A	#N/A	#N/A	#N/A	#N/A	#N/A	#N/A	#N/A	#N/A	#N/A	#N/A	#N/A	#N/A	#N/A	#N/A	#N/A	#N/A	#N/A
P-0003062-T01-IM5	Female	Cutaneous Melanoma	Metastasis	In-transit	LR / In-Transit / Regional LN	IMPACTv5-CLIN-20150020	57.9	0	1960	Skin, neck	1	No	0	NRAS_Q61	0	#N/A	#N/A	#N/A	#N/A	#N/A	#N/A	#N/A	#N/A	#N/A	#N/A	#N/A	#N/A	#N/A	#N/A	#N/A	#N/A	#N/A	#N/A	#N/A	#N/A	#N/A
P-0003069-T01-IM5	Female	Cutaneous Melanoma	Metastasis	Lung	Lung	IMPACTv5-CLIN-20150022	72.8	1	696	Skin, trunk	2	Yes	0	RAS_OTHER	0	#N/A	#N/A	#N/A	#N/A	#N/A	#N/A	#N/A	#N/A	#N/A	#N/A	#N/A	#N/A	#N/A	#N/A	#N/A	#N/A	#N/A	#N/A	#N/A	#N/A	#N/A
P-0003199-T01-IM5	Male	Cutaneous Melanoma	Primary	Not Applicable	NA	IMPACTv5-CLIN-20150029	27.1	1	760	Skin, scalp	1	No	0	Other_Driver	0	#N/A	#N/A	#N/A	#N/A	#N/A	#N/A	#N/A	#N/A	#N/A	#N/A	#N/A	#N/A	#N/A	#N/A	#N/A	#N/A	#N/A	#N/A	#N/A	#N/A	#N/A
P-0003225-T01-IM5	Female	Cutaneous Melanoma	Metastasis	Bone	Bone	IMPACTv5-CLIN-20150031	77.6	0	3354	Skin, trunk	2	No	0	NRAS_Q61	1	Ipilimumab, Nivolumab	PD-1 combo	0	0	57.9945	57.9945	82	0	223	0.906504	0	2.84211	0	9	9	1	0	1	0	M1c	M1c
P-0003255-T01-IM5	Male	Melanoma of Unknown Primary	Metastasis	Lymph Node, Non-Regional	Soft Tissue / Distant LN	IMPACTv5-CLIN-20150033	68.2	1	361	Unknown Primary	8	NA	0	BRAF_CLASS_1_V600E	0	#N/A	#N/A	#N/A	#N/A	#N/A	#N/A	#N/A	#N/A	#N/A	#N/A	#N/A	#N/A	#N/A	#N/A	#N/A	#N/A	#N/A	#N/A	#N/A	#N/A	#N/A
P-0003358-T01-IM5	Female	Cutaneous Melanoma	Metastasis	In-transit	LR / In-Transit / Regional LN	IMPACTv5-CLIN-20150041	56	0	5089	Skin, leg/hip	4	No	0	NRAS_Q61	0	#N/A	#N/A	#N/A	#N/A	#N/A	#N/A	#N/A	#N/A	#N/A	#N/A	#N/A	#N/A	#N/A	#N/A	#N/A	#N/A	#N/A	#N/A	#N/A	#N/A	#N/A
P-0003372-T01-IM5	Female	Cutaneous Melanoma	Metastasis	Lymph node, Regional	LR / In-Transit / Regional LN	IMPACTv5-CLIN-20150042	55.3	0	1710	Skin, leg/hip	4	Yes	0	BRAF_CLASS_1_V600E	0	#N/A	#N/A	#N/A	#N/A	#N/A	#N/A	#N/A	#N/A	#N/A	#N/A	#N/A	#N/A	#N/A	#N/A	#N/A	#N/A	#N/A	#N/A	#N/A	#N/A	#N/A
P-0003560-T01-IM5	Male	Melanoma of Unknown Primary	Metastasis	Soft Tissue	Soft Tissue / Distant LN	IMPACTv5-CLIN-20150057	66.4	1	1505	Unknown Primary	8	NA	0	NF1	0	#N/A	#N/A	#N/A	#N/A	#N/A	#N/A	#N/A	#N/A	#N/A	#N/A	#N/A	#N/A	#N/A	#N/A	#N/A	#N/A	#N/A	#N/A	#N/A	#N/A	#N/A
P-0003609-T01-IM5	Male	Cutaneous Melanoma	Metastasis	Soft Tissue	Soft Tissue / Distant LN	IMPACTv5-CLIN-20150059	60.4	1	5407	Skin, trunk	2	No	0	BRAF_CLASS_1_V600E	0	#N/A	#N/A	#N/A	#N/A	#N/A	#N/A	#N/A	#N/A	#N/A	#N/A	#N/A	#N/A	#N/A	#N/A	#N/A	#N/A	#N/A	#N/A	#N/A	#N/A	#N/A
P-0003620-T02-IM5	Female	Cutaneous Melanoma	Metastasis	Brain	Brain	IMPACTv5-CLIN-20150185	52.3	0	2101	Skin, arm/shoulder	3	Yes	0	KIT_PDGFRA	0	#N/A	#N/A	#N/A	#N/A	#N/A	#N/A	#N/A	#N/A	#N/A	#N/A	#N/A	#N/A	#N/A	#N/A	#N/A	#N/A	#N/A	#N/A	#N/A	#N/A	#N/A
P-0003621-T01-IM5	Female	Cutaneous Melanoma	Metastasis	Lymph node, Regional	LR / In-Transit / Regional LN	IMPACTv5-CLIN-20150060	48.7	0	2064	Skin, trunk	2	Yes	0	BRAF_CLASS_1_Other	1	Ipilimumab, Nivolumab	PD-1 combo	0	0	63.0575	63.0575	49	0	249	1.0122	1	3.35714	0	9	9	1	0	0	0	M1c	M1b
P-0003700-T01-IM5	Male	Cutaneous Melanoma	Metastasis	Lymph Node, Regional	LR / In-Transit / Regional LN	IMPACTv5-CLIN-20150063R	71.4	0	2446	Skin, trunk	2	No	0	Other_Driver	1	Ipilimumab, Nivolumab	PD-1 combo	1	0	35.3096	64.6027	73	0	266	1.0813	1	2.22222	0	9	9	0	0	0	0	M1c	M0
P-0003728-T01-IM5	Male	Melanoma of Unknown Primary	Metastasis	Lymph Node, Non-Regional	Soft Tissue / Distant LN	IMPACTv5-CLIN-20150070	55.1	0	1807	Unknown Primary	8	NA	0	RAS_OTHER	1	Ipilimumab, Nivolumab	PD-1 combo	0	0	58.4548	58.4548	55	0	176	0.715447	0	3.83333	0	9	9	1	0	0	0	M1b	M1b
P-0003742-T01-IM5	Female	Cutaneous Melanoma	Metastasis	Lymph node, Regional	LR / In-Transit / Regional LN	IMPACTv5-CLIN-20150071	32.6	1	1487	Skin, trunk	2	No	0	BRAF_CLASS_1_V600E	0	#N/A	#N/A	#N/A	#N/A	#N/A	#N/A	#N/A	#N/A	#N/A	#N/A	#N/A	#N/A	#N/A	#N/A	#N/A	#N/A	#N/A	#N/A	#N/A	#N/A	#N/A
P-0003757-T01-IM5	Male	Melanoma of Unknown Primary	Metastasis	Lymph node, Regional	LR / In-Transit / Regional LN	IMPACTv5-CLIN-20150072	64	1	1439	Unknown Primary	8	NA	1	BRAF_CLASS_2_3	1	Ipilimumab, Nivolumab	PD-1 combo	1	1	6.47671	35.7041	65	0	130	0.528455	0	3.89474	0	9	9	0	0	0	0	M1c	M1c
P-0003871-T01-IM5	Male	Cutaneous Melanoma	Metastasis	Lung	Lung	IMPACTv5-CLIN-20150084	69.3	0	5459	Skin, neck	1	Unknown	0	NF1	1	Pembrolizumab	PD-1 Mono	0	0	4.2411	4.2411	84	1	198	0.804878	0	3.07143	0	1	1	1	0	0	0	M1b	M1b
P-0003921-T01-IM5	Male	Cutaneous Melanoma	Metastasis	Brain	Brain	IMPACTv5-CLIN-20150081	40.7	0	3600	Skin, arm/shoulder	3	Unknown	0	BRAF_CLASS_1_V600E	1	Ipilimumab, Nivolumab	PD-1 combo	0	0	49.9068	49.9068	46	0	246	1	0	3.41176	0	9	9	0	1	0	0	M1c	M1d
P-0003966-T01-IM5	Male	Cutaneous Melanoma	Metastasis	Lung	Lung	IMPACTv5-CLIN-20150081	28.4	1	1404	Skin, foot	4	No	0	BRAF_CLASS_1_V600E	0	#N/A	#N/A	#N/A	#N/A	#N/A	#N/A	#N/A	#N/A	#N/A	#N/A	#N/A	#N/A	#N/A	#N/A	#N/A	#N/A	#N/A	#N/A	#N/A	#N/A	#N/A
P-0004048-T01-IM5	Male	Cutaneous Melanoma	Metastasis	Brain	Brain	IMPACTv5-CLIN-20150086	43.8	1	4744	Skin, leg/hip	4	Unknown	1	NRAS_Q61	0	#N/A	#N/A	#N/A	#N/A	#N/A	#N/A	#N/A	#N/A	#N/A	#N/A	#N/A	#N/A	#N/A	#N/A	#N/A	#N/A	#N/A	#N/A	#N/A	#N/A	#N/A
P-0004132-T01-IM5	Male	Cutaneous Melanoma	Metastasis	In-transit	LR / In-Transit / Regional LN	IMPACTv5-CLIN-20150094	41.8	1	832	Skin, trunk	2	No	0	BRAF_CLASS_1_Other	1	Ipilimumab, Nivolumab	PD-1 combo	1	1	1.9726	22.3562	42	0	170	0.691057	0	1.05882	0	9	9	0	0	0	0	M0	M0
P-0004142-T01-IM5	Female	Cutaneous Melanoma	Metastasis	Soft Tissue	Soft Tissue / Distant LN	IMPACTv5-CLIN-20150093	65.8	1	1500	Skin, arm/shoulder	3	No	0	NRAS_Q61	0	#N/A	#N/A	#N/A	#N/A	#N/A	#N/A	#N/A	#N/A	#N/A	#N/A	#N/A	#N/A	#N/A	#N/A	#N/A	#N/A	#N/A	#N/A	#N/A	#N/A	#N/A
P-0004203-T01-IM5	Male	Cutaneous Melanoma	Metastasis	Lymph node, Regional	LR / In-Transit / Regional LN	IMPACTv5-CLIN-20150100	22.4	0	1729	Skin, trunk	2	Yes	0	BRAF_CLASS_2_3	1	Ipilimumab, Nivolumab	PD-1 combo	0	0	55.6932	55.6932	22	0	196	0.796748	0	5.81818	1	9	9	0	0	0	0	M0	M0
P-0004214-T01-IM5	Male	Cutaneous Melanoma	Metastasis	Lymph node, Regional	LR / In-Transit / Regional LN	IMPACTv5-CLIN-20150100	79.6	1	2313	Skin, trunk	2	Yes	0	NRAS_Q61	1	Pembrolizumab	PD-1 Mono	1	1	8.71233	31.3644	83	0	337	1.36992	1	6.16667	1	1	0	1	1	0	0	M1c	M1d
P-0004236-T01-IM5	Female	Melanoma of Unknown Primary	Metastasis	Brain	Brain	IMPACTv5-CLIN-20150098	39.3	1	799	Unknown Primary	8	NA	0	NF1	0	#N/A	#N/A	#N/A	#N/A	#N/A	#N/A	#N/A	#N/A	#N/A	#N/A	#N/A	#N/A	#N/A	#N/A	#N/A	#N/A	#N/A	#N/A	#N/A	#N/A	#N/A
P-0004253-T01-IM5	Male	Cutaneous Melanoma	Metastasis	Lung	Lung	IMPACTv5-CLIN-20150101	50	1	3493	Skin, trunk	2	No	1	NRAS_Q61	0	#N/A	#N/A	#N/A	#N/A	#N/A	#N/A	#N/A	#N/A	#N/A	#N/A	#N/A	#N/A	#N/A	#N/A	#N/A	#N/A	#N/A	#N/A	#N/A	#N/A	#N/A
P-0004272-T01-IM5	Male	Melanoma of Unknown Primary	Metastasis	Bone	Bone	IMPACTv5-CLIN-20150103	76.4	1	158	Unknown Primary	8	NA	0	NRAS_Q61	1	Pembrolizumab	PD-1 Mono	1	1	1.61096	3.25479	77	1	517	2.10163	1	4.66667	0	1	0	0	0	1	1	M1c	M1c
P-0004348-T01-IM5	Female	Cutaneous Melanoma	Metastasis	In-transit	LR / In-Transit / Regional LN	IMPACTv5-CLIN-20150102	44.7	0	2573	Skin, trunk	2	Yes	0	BRAF_CLASS_2_3	1	Ipilimumab, Nivolumab	PD-1 combo	0	0	31.5288	31.5288	49	0	271	1.10163	1	6.2	1	9	9	0	0	0	0	M1c	M1a
P-0004349-T01-IM5	Female	Cutaneous Melanoma	Metastasis	Brain	Brain	IMPACTv5-CLIN-20150102	69.3	1	2423	Skin, arm/shoulder	3	Yes	0	BRAF_CLASS_1_V600E	1	Pembrolizumab	PD-1 Mono	1	1	44.9425	44.9425	72	1	Unknown	Unknown	Unknown	2.33333	0	1	1	0	1	0	0	M1c	M1d
P-0004437-T01-IM5	Female	Cutaneous Melanoma	Primary	Not Applicable	NA	IMPACTv5-CLIN-20150116	81.3	0	2156	Skin, leg/hip	4	Yes	0	NRAS_Q61	1	Ipilimumab, Nivolumab	PD-1 combo	0	0	60.1315	60.1315	82	1	220	0.894309	0	2.5	0	9	9	0	0	0	0	M0	M0
P-0004457-T01-IM5	Female	Melanoma of Unknown Primary	Metastasis	Lymph Node, Non-Regional	Soft Tissue / Distant LN	IMPACTv5-CLIN-20150115	82.7	1	380	Unknown Primary	8	NA	0	NRAS_Q61	1	Pembrolizumab	PD-1 Mono	1	1	10.5534	10.5534	83	0	182	0.739837	0	3.1875	0	1	1	1	0	1	1	M1c	M1c
P-0004518-T01-IM5	Female	Cutaneous Melanoma	Metastasis	In-transit	LR / In-Transit / Regional LN	IMPACTv5-CLIN-20150125	61.6	0	3430	Skin, leg/hip	4	No	0	NRAS_Q61	0	#N/A	#N/A	#N/A	#N/A	#N/A	#N/A	#N/A	#N/A	#N/A	#N/A	#N/A	#N/A	#N/A	#N/A	#N/A	#N/A	#N/A	#N/A	#N/A	#N/A	#N/A
P-0004554-T01-IM5	Male	Cutaneous Melanoma	Primary	Not Applicable	NA	IMPACTv5-CLIN-20150127	51.5	0	1127	Skin, trunk	2	Yes	0	Other_Driver	0	#N/A	#N/A	#N/A	#N/A	#N/A	#N/A	#N/A	#N/A	#N/A	#N/A	#N/A	#N/A	#N/A	#N/A	#N/A	#N/A	#N/A	#N/A	#N/A	#N/A	#N/A
P-0004650-T01-IM5	Male	Melanoma of Unknown Primary	Metastasis	Liver	Liver	IMPACTv5-CLIN-20150130	70	0	85	Unknown Primary	8	NA	0	NF1	0	#N/A	#N/A	#N/A	#N/A	#N/A	#N/A	#N/A	#N/A	#N/A	#N/A	#N/A	#N/A	#N/A	#N/A	#N/A	#N/A	#N/A	#N/A	#N/A	#N/A	#N/A
P-0004661-T01-IM5	Male	Cutaneous Melanoma	Metastasis	Lung	Lung	IMPACTv5-CLIN-20150131	31.6	0	2248	Skin, trunk	2	Yes	0	BRAF_CLASS_1_V600E	1	Ipilimumab, Nivolumab	PD-1 combo	0	0	62.3014	62.3014	33	0	184	0.747967	0	2.36842	0	9	9	1	0	0	0	M1b	M1b
P-0004700-T02-IM5	Male	Cutaneous Melanoma	Metastasis	In-transit	LR / In-Transit / Regional LN	IMPACTv5-CLIN-20160185	57.4	1	1395	Skin, arm/shoulder	3	Yes	0	NRAS_Q61	0	#N/A	#N/A	#N/A	#N/A	#N/A	#N/A	#N/A	#N/A	#N/A	#N/A	#N/A	#N/A	#N/A	#N/A	#N/A	#N/A	#N/A	#N/A	#N/A	#N/A	#N/A
P-0004914-T01-IM5	Female	Cutaneous Melanoma	Metastasis	In-transit	LR / In-Transit / Regional LN	IMPACTv5-CLIN-20150151	22.7	0	3353	Skin, arm/shoulder	3	No	0	NRAS_Q61	0	#N/A	#N/A	#N/A	#N/A	#N/A	#N/A	#N/A	#N/A	#N/A	#N/A	#N/A	#N/A	#N/A	#N/A	#N/A	#N/A	#N/A	#N/A	#N/A	#N/A	#N/A
P-0004933-T01-IM5	Male	Cutaneous Melanoma	Metastasis	Spine	Bone	IMPACTv5-CLIN-20150153	53.5	1	2131	Skin, trunk	2	Yes	1	BRAF_CLASS_2_3	1	Ipilimumab, Nivolumab	PD-1 combo	1	1	32.4493	38.9918	56	1	158	0.642276	0	3.63158	0	9	9	1	0	1	1	M1c	M1c
P-0004952-T01-IM5	Male	Cutaneous Melanoma	Metastasis	Lung	Lung	IMPACTv5-CLIN-20150154	45.9	0	4571	Skin, trunk	2	No	0	NF1	1	Ipilimumab, Nivolumab	PD-1 combo	0	0	56.1205	56.1205	54	0	144	0.585366	0	6.16667	1	9	9	1	0	0	0	M1b	M1b
P-0005039-T01-IM5	Female	Cutaneous Melanoma	Metastasis	Liver	Liver	IMPACTv5-CLIN-20150157	74.8	1	1054	Skin, face	1	No	0	NRAS_Q61	1	Ipilimumab, Nivolumab	PD-1 combo	1	1	1.47945	1.47945	78	0	431	1.75203	1	17.4167	1	9	9	1	0	1	1	M1c	M1c
P-0005053-T01-IM5	Male	Cutaneous Melanoma	Metastasis	Lung	Lung	IMPACTv5-CLIN-20150159	46.1	0	5589	Skin, trunk	2	Unknown	0	Other_Driver	1	Ipilimumab, Nivolumab	PD-1 combo	0	0	59.8356	59.8356	56	0	131	0.53252	0	1.66667	0	9	9	1	0	0	0	M1b	M1b
P-0005062-T01-IM5	Female	Melanoma of Unknown Primary	Metastasis	Adrenal Gland	Other Visceral	IMPACTv5-CLIN-20150163	58.7	0	1934	Unknown Primary	8	NA	0	BRAF_CLASS_1_V600E	1	Ipilimumab, Nivolumab	PD-1 combo	1	0	26.4	60.0986	59	0	323	1.31301	1	2.6875	0	9	9	1	0	0	0	M1c	M1c
P-0005109-T01-IM5	Male	Cutaneous Melanoma	Metastasis	Lymph node, Regional	LR / In-Transit / Regional LN	IMPACTv5-CLIN-20150161	60.7	0	1059	Skin, arm/shoulder	3	Yes	0	BRAF_CLASS_2_3	1	Ipilimumab, Nivolumab	PD-1 combo	0	0	32.4164	32.4164	61	0	260	1.05691	1	3.64	0	9	9	1	0	0	0	M1b	M1b
P-0005118-T01-IM5	Male	Cutaneous Melanoma	Metastasis	Lymph node, Regional	LR / In-Transit / Regional LN	IMPACTv5-CLIN-20150164	74.2	0	2535	Skin, arm/shoulder	3	Unknown	0	RAS_OTHER	1	Ipilimumab, Nivolumab	PD-1 combo	0	0	59.3425	59.3425	76	0	216	0.878049	0	3.27273	0	9	9	0	0	0	0	M0	M0
P-0005129-T01-IM5	Female	Cutaneous Melanoma	Metastasis	In-transit	LR / In-Transit / Regional LN	IMPACTv5-CLIN-20150164	88.8	1	627	Skin, leg/hip	4	Yes	0	NRAS_Q61	1	Pembrolizumab	PD-1 Mono	1	1	2.76164	10.6521	90	1	205	0.833333	0	2.68421	0	0	1	0	0	0	0	M0	M0
P-0005144-T01-IM5	Male	Cutaneous Melanoma	Metastasis	Lymph node, Regional	LR / In-Transit / Regional LN	IMPACTv5-CLIN-20150166R	54.5	1	3422	Skin, leg/hip	4	Yes	0	Other_Driver	0	#N/A	#N/A	#N/A	#N/A	#N/A	#N/A	#N/A	#N/A	#N/A	#N/A	#N/A	#N/A	#N/A	#N/A	#N/A	#N/A	#N/A	#N/A	#N/A	#N/A	#N/A
P-0005146-T01-IM5	Female	Cutaneous Melanoma	Metastasis	Soft Tissue	Soft Tissue / Distant LN	IMPACTv5-CLIN-20150166R	75.8	0	2543	Skin, foot	4	No	0	KIT_PDGFRA	1	Pembrolizumab	PD-1 Mono	0	0	60.1973	60.1973	78	0	Unknown	Unknown	Unknown	2	0	1	1	0	0	0	0	M0	M0
P-0005159-T01-IM5	Male	Cutaneous Melanoma	Primary	Not Applicable	NA	IMPACTv5-CLIN-20150167	82.9	1	920	Skin, scalp	1	No	0	NF1	1	Pembrolizumab	PD-1 Mono	1	1	6.90411	27.4849	83	0	Unknown	Unknown	Unknown	7.875	1	0	0	0	0	1	1	M1c	M1c
P-0005228-T01-IM5	Male	Cutaneous Melanoma	Metastasis	Soft Tissue	Soft Tissue / Distant LN	IMPACTv5-CLIN-20150171	72.7	0	1708	Skin, face	1	Yes	0	NF1	0	#N/A	#N/A	#N/A	#N/A	#N/A	#N/A	#N/A	#N/A	#N/A	#N/A	#N/A	#N/A	#N/A	#N/A	#N/A	#N/A	#N/A	#N/A	#N/A	#N/A	#N/A
P-0005260-T01-IM5	Female	Cutaneous Melanoma	Primary	Not Applicable	NA	IMPACTv5-CLIN-20150173	73.4	0	2431	Skin, trunk	2	No	0	BRAF_CLASS_1_V600E	1	Pembrolizumab	PD-1 Mono	1	0	9.43562	13.2164	79	0	Unknown	Unknown	Unknown	1.78378	0	1	1	0	1	0	0	M1c	M1d
P-0005352-T01-IM5	Female	Cutaneous Melanoma	Metastasis	Liver	Liver	IMPACTv5-CLIN-20150180	53.8	0	5883	Skin, leg/hip	4	No	0	NRAS_Q61	1	Ipilimumab, Nivolumab	PD-1 combo	1	0	8.28493	58.7178	65	1	3116	12.6667	1	2.85	0	9	9	0	0	0	1	M1c	M1c
P-0005366-T01-IM5	Male	Cutaneous Melanoma	Metastasis	Lung	Lung	IMPACTv5-CLIN-20150181	70.7	1	1560	Skin, face	1	Yes	0	NF1	1	Pembrolizumab	PD-1 Mono	1	1	11.2438	12.8219	74	0	247	1.00407	1	1.4375	0	1	1	1	1	0	0	M1c	M1d
P-0005370-T01-IM5	Male	Cutaneous Melanoma	Primary	Not Applicable	NA	IMPACTv5-CLIN-20150181	72.2	1	212	Skin, trunk	2	No	0	BRAF_CLASS_1_V600E	0	#N/A	#N/A	#N/A	#N/A	#N/A	#N/A	#N/A	#N/A	#N/A	#N/A	#N/A	#N/A	#N/A	#N/A	#N/A	#N/A	#N/A	#N/A	#N/A	#N/A	#N/A
P-0005383-T01-IM5	Male	Melanoma of Unknown Primary	Metastasis	Brain	Brain	IMPACTv5-CLIN-20150182	39.6	0	1972	Unknown Primary	8	NA	0	RAS_OTHER	0	#N/A	#N/A	#N/A	#N/A	#N/A	#N/A	#N/A	#N/A	#N/A	#N/A	#N/A	#N/A	#N/A	#N/A	#N/A	#N/A	#N/A	#N/A	#N/A	#N/A	#N/A
P-0005421-T01-IM5	Male	Cutaneous Melanoma	Local Recurrence	Not Applicable	LR / In-Transit / Regional LN	IMPACTv5-CLIN-20150183	70.9	1	1769	Skin, scalp	1	No	0	BRAF_CLASS_1_Other	1	Pembrolizumab	PD-1 Mono	1	1	22.4877	46.8164	72	0	145	0.589431	0	5	1	0	0	0	0	0	0	M0	M0
P-0005461-T02-IM5	Male	Cutaneous Melanoma	Metastasis	Lymph node, Regional	LR / In-Transit / Regional LN	IMPACTv5-CLIN-20150201	27.8	0	392	Skin, trunk	2	Yes	0	BRAF_CLASS_2_3	0	#N/A	#N/A	#N/A	#N/A	#N/A	#N/A	#N/A	#N/A	#N/A	#N/A	#N/A	#N/A	#N/A	#N/A	#N/A	#N/A	#N/A	#N/A	#N/A	#N/A	#N/A
P-0005493-T01-IM5	Male	Cutaneous Melanoma	Metastasis	Lymph node, Regional	LR / In-Transit / Regional LN	IMPACTv5-CLIN-20150188	24.1	0	2876	Skin, arm/shoulder	3	No	0	BRAF_CLASS_1_V600E	1	Ipilimumab, Nivolumab	PD-1 combo	0	0	56.5151	56.5151	27	0	216	0.878049	0	2.89474	0	9	9	0	0	0	0	M0	M0
P-0005583-T01-IM5	Female	Cutaneous Melanoma	Metastasis	Lymph node, Regional	LR / In-Transit / Regional LN	IMPACTv5-CLIN-20150195	22.2	1	1096	Skin, scalp	1	No	0	BRAF_CLASS_1_V600E	0	#N/A	#N/A	#N/A	#N/A	#N/A	#N/A	#N/A	#N/A	#N/A	#N/A	#N/A	#N/A	#N/A	#N/A	#N/A	#N/A	#N/A	#N/A	#N/A	#N/A	#N/A
P-0005604-T01-IM5	Male	Cutaneous Melanoma	Metastasis	Lung	Lung	IMPACTv5-CLIN-20150196	29.7	0	2904	Skin, trunk	2	No	0	Unknown_Driver	1	Ipilimumab, Nivolumab	PD-1 combo	1	0	25.0521	59.0795	33	1	165	0.670732	0	1.52632	0	9	9	1	0	0	0	M1b	M1b
P-0005673-T01-IM5	Male	Cutaneous Melanoma	Metastasis	Soft Tissue	Soft Tissue / Distant LN	IMPACTv5-CLIN-20150203	60.3	0	2059	Skin, neck	1	Yes	0	BRAF_CLASS_1_V600E	0	#N/A	#N/A	#N/A	#N/A	#N/A	#N/A	#N/A	#N/A	#N/A	#N/A	#N/A	#N/A	#N/A	#N/A	#N/A	#N/A	#N/A	#N/A	#N/A	#N/A	#N/A
P-0005725-T01-IM5	Male	Melanoma of Unknown Primary	Metastasis	Bone	Bone	IMPACTv5-CLIN-20150207	70.5	0	1259	Unknown Primary	8	NA	0	NF1	1	Pembrolizumab	PD-1 Mono	1	0	6.57534	40.9973	71	1	Unknown	Unknown	Unknown	4.61905	0	1	0	0	1	1	0	M1c	M1d
P-0005733-T01-IM5	Female	Melanoma of Unknown Primary	Metastasis	Lung	Lung	IMPACTv5-CLIN-20150213	64.4	1	1366	Unknown Primary	8	NA	0	BRAF_CLASS_1_Other	0	#N/A	#N/A	#N/A	#N/A	#N/A	#N/A	#N/A	#N/A	#N/A	#N/A	#N/A	#N/A	#N/A	#N/A	#N/A	#N/A	#N/A	#N/A	#N/A	#N/A	#N/A
P-0005769-T01-IM5	Male	Cutaneous Melanoma	Metastasis	Small Bowel	Other Visceral	IMPACTv5-CLIN-20150214	54.2	0	5650	Skin, trunk	2	No	0	BRAF_CLASS_1_V600E	1	Ipilimumab, Nivolumab	PD-1 Combo	0	0	22.0603	22.0603	68	0	Unknown	Unknown	Unknown	4.15385	0	9	9	0	0	0	0	M1c	M1c
P-0005928-T01-IM5	Male	Cutaneous Melanoma	Metastasis	Lung	Lung	IMPACTv5-CLIN-20150226	67.5	0	1905	Skin, trunk	2	Yes	0	RAS_OTHER	1	Pembrolizumab	PD-1 Mono	0	0	52.6356	52.6356	68	0	Unknown	Unknown	Unknown	2.0625	0	1	1	1	0	0	0	M1b	M1b
P-0005971-T01-IM5	Female	Cutaneous Melanoma	Metastasis	Bone	Bone	IMPACTv5-CLIN-20150225	18.5	1	2795	Skin, trunk	2	No	0	BRAF_CLASS_1_V600E	1	Ipilimumab, Nivolumab	PD-1 combo	1	1	5.06301	12.7562	25	0	192	0.780488	0	1.43478	0	9	9	0	0	1	0	M1c	M1c
P-0006034-T01-IM5	Male	Cutaneous Melanoma	Metastasis	Lymph Node, Non-Regional	Soft Tissue / Distant LN	IMPACTv5-CLIN-20150232	72.4	1	1899	Skin, arm/shoulder	3	No	0	RAS_OTHER	1	Ipilimumab, Nivolumab	PD-1 combo	1	1	20.811	43.0027	74	0	199	0.808943	0	2.53333	0	9	9	1	0	1	0	M1c	M1c
P-0006155-T02-IM5	Male	Cutaneous Melanoma	Metastasis	Lung	Lung	IMPACTv5-CLIN-20150260	81	0	1782	Skin, scalp	1	No	0	Unknown_Driver	1	Pembrolizumab	PD-1 Mono	0	0	32.0877	32.0877	83	2	142	0.577236	0	14.875	1	0	0	1	1	1	1	M1c	M1d
P-0006177-T01-IM5	Male	Cutaneous Melanoma	Metastasis	Lymph Node, Regional	LR / In-Transit / Regional LN	IMPACTv5-CLIN-20150241	55.5	1	2823	Skin, eyelid	1	No	0	NF1	0	#N/A	#N/A	#N/A	#N/A	#N/A	#N/A	#N/A	#N/A	#N/A	#N/A	#N/A	#N/A	#N/A	#N/A	#N/A	#N/A	#N/A	#N/A	#N/A	#N/A	#N/A
P-0006192-T01-IM5	Female	Cutaneous Melanoma	Metastasis	Soft Tissue	Soft Tissue / Distant LN	IMPACTv5-CLIN-20150242	30	0	3576	Skin, leg/hip	4	Yes	0	Unknown_Driver	1	Ipilimumab, Nivolumab	PD-1 combo	0	0	57.9616	57.9616	35	0	191	0.776423	0	1.125	0	9	9	1	0	0	0	M1b	M1b
P-0006193-T01-IM5	Female	Cutaneous Melanoma	Metastasis	Lymph Node, Regional	LR / In-Transit / Regional LN	IMPACTv5-CLIN-20150242	71.9	1	3796	Skin, arm/shoulder	3	No	0	BRAF_CLASS_1_V600E	1	Ipilimumab, Nivolumab	PD-1 combo	1	1	0.690411	1.74247	82	1	179	0.727642	0	10.75	1	9	9	1	0	0	1	M1c	M1c
P-0006267-T01-IM5	Male	Cutaneous Melanoma	Metastasis	Lymph Node, Regional	LR / In-Transit / Regional LN	IMPACTv5-CLIN-20150247	69.2	0	1505	Skin, face	1	Unknown	0	NF1	0	#N/A	#N/A	#N/A	#N/A	#N/A	#N/A	#N/A	#N/A	#N/A	#N/A	#N/A	#N/A	#N/A	#N/A	#N/A	#N/A	#N/A	#N/A	#N/A	#N/A	#N/A
P-0006339-T01-IM5	Female	Cutaneous Melanoma	Metastasis	Liver	Liver	IMPACTv5-CLIN-20150253	57.5	0	2683	Skin, trunk	2	Yes	0	Unknown_Driver	1	Pembrolizumab	PD-1 Mono	0	0	13.0192	13.0192	64	1	184	0.747967	0	3.46667	0	0	1	0	0	1	1	M1c	M1c
P-0006407-T01-IM5	Male	Cutaneous Melanoma	Metastasis	Lung	Lung	IMPACTv5-CLIN-20150258	74.8	0	1185	Skin, scalp	1	No	0	NF1	0	#N/A	#N/A	#N/A	#N/A	#N/A	#N/A	#N/A	#N/A	#N/A	#N/A	#N/A	#N/A	#N/A	#N/A	#N/A	#N/A	#N/A	#N/A	#N/A	#N/A	#N/A
P-0006423-T01-IM5	Male	Melanoma of Unknown Primary	Metastasis	Soft Tissue	Soft Tissue / Distant LN	IMPACTv5-CLIN-20150261	54.4	0	1484	Unknown Primary	8	NA	0	NRAS_Q61	0	#N/A	#N/A	#N/A	#N/A	#N/A	#N/A	#N/A	#N/A	#N/A	#N/A	#N/A	#N/A	#N/A	#N/A	#N/A	#N/A	#N/A	#N/A	#N/A	#N/A	#N/A
P-0006476-T01-IM5	Male	Cutaneous Melanoma	Metastasis	Small Bowel	Other Visceral	IMPACTv5-CLIN-20150259R	26.6	1	5995	Skin, face	1	Unknown	0	BRAF_CLASS_1_V600E	0	#N/A	#N/A	#N/A	#N/A	#N/A	#N/A	#N/A	#N/A	#N/A	#N/A	#N/A	#N/A	#N/A	#N/A	#N/A	#N/A	#N/A	#N/A	#N/A	#N/A	#N/A
P-0006541-T02-IM5	Male	Melanoma of Unknown Primary	Metastasis	Soft Tissue	Soft Tissue / Distant LN	IMPACTv5-CLIN-20150405	76	1	2657	Unknown Primary	8	NA	0	BRAF_CLASS_1_Other	0	#N/A	#N/A	#N/A	#N/A	#N/A	#N/A	#N/A	#N/A	#N/A	#N/A	#N/A	#N/A	#N/A	#N/A	#N/A	#N/A	#N/A	#N/A	#N/A	#N/A	#N/A
P-0006621-T01-IM5	Male	Cutaneous Melanoma	Primary	Not Applicable	NA	IMPACTv5-CLIN-20150274	66.8	0	1563	Skin, arm/shoulder	3	Yes	0	NRAS_Q61	1	Ipilimumab, Nivolumab	PD-1 Combo	0	0	43.2658	43.2658	67	0	281	1.14228	1	Unknown	Unknown	9	9	1	0	0	1	M1c	M1c
P-0006624-T01-IM5	Male	Melanoma of Unknown Primary	Metastasis	Soft Tissue	Soft Tissue / Distant LN	IMPACTv5-CLIN-20150275	58.4	0	1850	Unknown Primary	8	NA	0	BRAF_CLASS_1_V600E	1	Pembrolizumab	PD-1 Mono	0	0	42.8055	42.8055	59	1	166	0.737778	0	4.83333	1	1	0	0	0	0	0	M1a	M1a
P-0006719-T01-IM5	Female	Cutaneous Melanoma	Metastasis	Lymph Node, Regional	LR / In-Transit / Regional LN	IMPACTv5-CLIN-20150282	87.1	0	2456	Skin, leg/hip	4	Unknown	0	NF1	1	Pembrolizumab	PD-1 Mono	0	0	45.863	45.863	90	1	Unknown	Unknown	Unknown	2.91667	0	1	1	1	0	1	0	M1c	M1c
P-0006731-T01-IM5	Female	Melanoma of Unknown Primary	Metastasis	Lymph Node, Non-Regional	Soft Tissue / Distant LN	IMPACTv5-CLIN-20150282	51.8	0	1587	Unknown Primary	8	NA	0	BRAF_CLASS_1_V600E	1	Ipilimumab, Nivolumab	PD-1 combo	0	0	51.2219	51.2219	52	1	204	0.829268	0	2	0	9	9	0	0	0	0	M1a	M1a
P-0006796-T01-IM5	Female	Cutaneous Melanoma	Metastasis	Bone	Bone	IMPACTv5-CLIN-20150286	60.5	1	1481	Skin, arm/shoulder	3	No	0	NRAS_Q61	0	#N/A	#N/A	#N/A	#N/A	#N/A	#N/A	#N/A	#N/A	#N/A	#N/A	#N/A	#N/A	#N/A	#N/A	#N/A	#N/A	#N/A	#N/A	#N/A	#N/A	#N/A
P-0006845-T01-IM5	Male	Cutaneous Melanoma	Metastasis	Liver	Liver	IMPACTv5-CLIN-20150292	64.1	0	1827	Skin, trunk	2	No	0	RAS_OTHER	1	Pembrolizumab	PD-1 Mono	0	0	53.6219	53.6219	65	1	Unknown	Unknown	Unknown	2.25	0	1	1	0	0	0	1	M1c	M1c
P-0006952-T01-IM5	Male	Cutaneous Melanoma	Local Recurrence	Not Applicable	LR / In-Transit / Regional LN	IMPACTv5-CLIN-20150298	38.8	1	5395	Skin, lip	1	Unknown	1	Other_Driver	0	#N/A	#N/A	#N/A	#N/A	#N/A	#N/A	#N/A	#N/A	#N/A	#N/A	#N/A	#N/A	#N/A	#N/A	#N/A	#N/A	#N/A	#N/A	#N/A	#N/A	#N/A
P-0006973-T01-IM5	Male	Cutaneous Melanoma	Metastasis	Pelvis	Soft Tissue / Distant LN	IMPACTv5-CLIN-20150300	42.9	1	4240	Skin, arm/shoulder	3	Unknown	0	NRAS_Q61	0	#N/A	#N/A	#N/A	#N/A	#N/A	#N/A	#N/A	#N/A	#N/A	#N/A	#N/A	#N/A	#N/A	#N/A	#N/A	#N/A	#N/A	#N/A	#N/A	#N/A	#N/A
P-0007142-T01-IM5	Male	Cutaneous Melanoma	Metastasis	Lymph node, Regional	LR / In-Transit / Regional LN	IMPACTv5-CLIN-20150314	38	0	9470	Skin, leg/hip	4	Unknown	0	BRAF_CLASS_1_V600E	1	Pembrolizumab	PD-1 Mono	1	0	24.8219	55.3644	59	0	144	0.585366	0	1.73684	0	1	1	0	0	0	0	M0	M0
P-0007232-T02-IM6	Male	Cutaneous Melanoma	Metastasis	Lymph Node, Regional	LR / In-Transit / Regional LN	IMPACTv6-CLIN-20160343	56.4	1	989	Skin, arm/shoulder	3	No	0	NRAS_Q61	1	Pembrolizumab	PD-1 Mono	1	1	4.30685	18.5096	58	0	149	0.605691	0	3.23077	0	1	1	0	0	0	0	M0	M0
P-0007238-T01-IM5	Male	Cutaneous Melanoma	Metastasis	In-transit	LR / In-Transit / Regional LN	IMPACTv5-CLIN-20150324	26	1	2212	Skin, leg/hip	4	No	0	NRAS_Q61	0	#N/A	#N/A	#N/A	#N/A	#N/A	#N/A	#N/A	#N/A	#N/A	#N/A	#N/A	#N/A	#N/A	#N/A	#N/A	#N/A	#N/A	#N/A	#N/A	#N/A	#N/A
P-0007281-T01-IM5	Male	Cutaneous Melanoma	Metastasis	Lung	Lung	IMPACTv5-CLIN-20150323	80.9	1	304	Skin, trunk	2	Unknown	0	BRAF_CLASS_1_Other	1	Pembrolizumab	PD-1 Mono	1	1	0.624658	5.62192	81	1	206	0.837398	0	12	1	0	0	1	1	1	0	M1c	M1d
P-0007291-T01-IM5	Male	Melanoma of Unknown Primary	Metastasis	Lymph node, Non-regional	Soft Tissue / Distant LN	IMPACTv5-CLIN-20150326	39.2	1	796	Unknown Primary	8	NA	0	BRAF_CLASS_1_V600E	0	#N/A	#N/A	#N/A	#N/A	#N/A	#N/A	#N/A	#N/A	#N/A	#N/A	#N/A	#N/A	#N/A	#N/A	#N/A	#N/A	#N/A	#N/A	#N/A	#N/A	#N/A
P-0007492-T01-IM5	Female	Cutaneous Melanoma	Metastasis	Lymph node, Regional	LR / In-Transit / Regional LN	IMPACTv5-CLIN-20150336R	39.6	1	2956	Skin, trunk	2	No	0	BRAF_CLASS_1_V600E	0	#N/A	#N/A	#N/A	#N/A	#N/A	#N/A	#N/A	#N/A	#N/A	#N/A	#N/A	#N/A	#N/A	#N/A	#N/A	#N/A	#N/A	#N/A	#N/A	#N/A	#N/A
P-0007517-T01-IM5	Male	Cutaneous Melanoma	Metastasis	Lymph node, Regional	LR / In-Transit / Regional LN	IMPACTv5-CLIN-20150338	71.7	1	383	Skin, trunk	2	Yes	0	NRAS_Q61	1	Ipilimumab, Nivolumab	PD-1 combo	1	1	4.30685	4.30685	72	1	294	1.19512	1	3.6875	0	9	9	1	0	0	0	M1c	M1b
P-0007544-T01-IM5	Male	Cutaneous Melanoma	Metastasis	Lymph node, Regional	LR / In-Transit / Regional LN	IMPACTv5-CLIN-20150340	52.4	0	1367	Skin, trunk	2	No	0	NF1	0	#N/A	#N/A	#N/A	#N/A	#N/A	#N/A	#N/A	#N/A	#N/A	#N/A	#N/A	#N/A	#N/A	#N/A	#N/A	#N/A	#N/A	#N/A	#N/A	#N/A	#N/A
P-0007561-T01-IM5	Female	Cutaneous Melanoma	Metastasis	Brain	Brain	IMPACTv5-CLIN-20150341	32.3	1	1190	Skin, arm/shoulder	3	No	0	NF1	1	Ipilimumab, Nivolumab	PD-1 combo	1	1	0.328767	0.328767	36	1	240	0.97561	0	3.38889	0	9	9	0	1	0	1	M1c	M1d
P-0007810-T02-IM5	Male	Melanoma of Unknown Primary	Metastasis	Brain	Brain	IMPACTv5-CLIN-20150370	69.1	1	1449	Unknown Primary	8	NA	0	Other_Driver	1	Pembrolizumab	PD-1 Mono	1	1	2.53151	46.0603	69	3	201	0.817073	0	5.66667	1	0	0	1	1	1	0	M1c	M1d
P-0007876-T01-IM5	Female	Cutaneous Melanoma	Local Recurrence	Not Applicable	LR / In-Transit / Regional LN	IMPACTv5-CLIN-20150356	71	0	1664	Skin, scalp	1	No	0	NRAS_Q61	1	Pembrolizumab	PD-1 Mono	0	0	38.663	38.663	73	1	214	0.869919	0	2.09091	0	0	1	0	0	0	0	M0	M0
P-0007918-T01-IM5	Male	Cutaneous Melanoma	Metastasis	Lung	Lung	IMPACTv5-CLIN-20150360	66.8	1	1240	Skin, trunk	2	No	0	NF1	1	Ipilimumab, Nivolumab	PD-1 combo	1	1	1.34795	1.34795	70	1	271	1.10163	1	14.5556	1	9	9	1	1	0	0	M1c	M1d
P-0007970-T01-IM5	Male	Cutaneous Melanoma	Metastasis	Lymph node, Regional	LR / In-Transit / Regional LN	IMPACTv5-CLIN-20150365	53.1	0	1113	Skin, leg/hip	4	No	0	BRAF_CLASS_1_V600E	1	Ipilimumab, Nivolumab	PD-1 combo	0	0	18.3452	18.3452	55	1	141	0.573171	0	2.5	0	9	9	0	0	0	0	M0	M0
P-0007980-T01-IM5	Male	Cutaneous Melanoma	Metastasis	In-transit	LR / In-Transit / Regional LN	IMPACTv5-CLIN-20150364	53.8	0	1787	Skin, leg/hip	4	Yes	1	Other_Driver	0	#N/A	#N/A	#N/A	#N/A	#N/A	#N/A	#N/A	#N/A	#N/A	#N/A	#N/A	#N/A	#N/A	#N/A	#N/A	#N/A	#N/A	#N/A	#N/A	#N/A	#N/A
P-0007986-T01-IM5	Female	Cutaneous Melanoma	Primary	Not Applicable	NA	IMPACTv5-CLIN-20150364	65.9	0	575	Skin, leg/hip	4	No	0	NRAS_Q61	0	#N/A	#N/A	#N/A	#N/A	#N/A	#N/A	#N/A	#N/A	#N/A	#N/A	#N/A	#N/A	#N/A	#N/A	#N/A	#N/A	#N/A	#N/A	#N/A	#N/A	#N/A
P-0008009-T01-IM5	Male	Cutaneous Melanoma	Metastasis	Lymph node, regional	LR / In-Transit / Regional LN	IMPACTv5-CLIN-20150370	58.2	0	2072	Skin, leg/hip	4	Yes	0	NRAS_Q61	1	Ipilimumab, Nivolumab	PD-1 combo	0	0	54.1151	54.1151	59	0	239	0.971545	0	5.54545	1	9	9	1	0	0	0	M1b	M1b
P-0008050-T01-IM5	Male	Cutaneous Melanoma	Metastasis	Lymph node, Regional	LR / In-Transit / Regional LN	IMPACTv5-CLIN-20150372	49.4	1	3264	Skin, leg/hip	4	No	0	BRAF_CLASS_1_V600E	1	Pembrolizumab	PD-1 Mono	1	1	11.5068	33.863	56	0	200	0.813008	0	2.45833	0	1	1	1	0	0	0	M1b	M1b
P-0008080-T01-IM5	Male	Cutaneous Melanoma	Metastasis	Stomach	Other Visceral	IMPACTv5-CLIN-20150369	66.9	0	3868	Skin, arm/shoulder	3	No	0	NF1	0	#N/A	#N/A	#N/A	#N/A	#N/A	#N/A	#N/A	#N/A	#N/A	#N/A	#N/A	#N/A	#N/A	#N/A	#N/A	#N/A	#N/A	#N/A	#N/A	#N/A	#N/A
P-0008106-T03-IM6	Male	Cutaneous Melanoma	Metastasis	Lymph node, Regional	LR / In-Transit / Regional LN	IMPACTv6-CLIN-20180584	77.2	0	1817	Skin, trunk	2	No	0	NRAS_Q61	1	Nivolumab	PD-1 Mono	1	0	3.58356	17.9836	81	0	312	1.248	1	10.1667	1	1	0	0	0	1	0	M1c	M1c
P-0008228-T01-IM5	Male	Cutaneous Melanoma	Local Recurrence	Not Applicable	LR / In-Transit / Regional LN	IMPACTv5-CLIN-20150381	78.1	0	1846	Skin, trunk	2	Yes	0	Other_Driver	1	Pembrolizumab	PD-1 Mono	0	0	45.9945	45.9945	79	0	171	0.695122	0	2.91667	0	1	1	1	0	0	0	M1c	M1c
P-0008246-T02-IM5	Female	Cutaneous Melanoma	Metastasis	Colon	Other Visceral	IMPACTv5-CLIN-20150394	55.1	0	2377	Skin, trunk	2	Unknown	0	NF1	0	#N/A	#N/A	#N/A	#N/A	#N/A	#N/A	#N/A	#N/A	#N/A	#N/A	#N/A	#N/A	#N/A	#N/A	#N/A	#N/A	#N/A	#N/A	#N/A	#N/A	#N/A
P-0008360-T01-IM5	Male	Melanoma of Unknown Primary	Metastasis	Lymph node, Regional	LR / In-Transit / Regional LN	IMPACTv5-CLIN-20150386	45.3	0	1481	Unknown Primary	8	NA	0	BRAF_CLASS_1_V600E	0	#N/A	#N/A	#N/A	#N/A	#N/A	#N/A	#N/A	#N/A	#N/A	#N/A	#N/A	#N/A	#N/A	#N/A	#N/A	#N/A	#N/A	#N/A	#N/A	#N/A	#N/A
P-0008403-T01-IM5	Male	Cutaneous Melanoma	Metastasis	Lymph node, Regional	LR / In-Transit / Regional LN	IMPACTv5-CLIN-20150392	47.1	0	2267	Skin, arm/shoulder	3	No	0	NRAS_Q61	1	Ipilimumab, Nivolumab	PD-1 combo	1	0	3.41918	46.9479	49	0	171	0.695122	0	1.23529	0	9	9	0	0	0	0	M0	M0
P-0008434-T01-IM5	Female	Cutaneous Melanoma	Metastasis	Lung	Lung	IMPACTv5-CLIN-20150394	46.3	0	3070	Skin, face	1	No	0	NF1	1	Pembrolizumab	PD-1 Mono	0	0	50.5644	50.5644	50	0	Unknown	Unknown	Unknown	2.7	0	1	1	1	0	0	0	M1b	M1b
P-0008445-T01-IM5	Male	Cutaneous Melanoma	Metastasis	Lymph node, Regional	LR / In-Transit / Regional LN	IMPACTv5-CLIN-20150397	49.4	0	1287	Skin, scalp	1	No	0	BRAF_CLASS_1_Other	0	#N/A	#N/A	#N/A	#N/A	#N/A	#N/A	#N/A	#N/A	#N/A	#N/A	#N/A	#N/A	#N/A	#N/A	#N/A	#N/A	#N/A	#N/A	#N/A	#N/A	#N/A
P-0008490-T01-IM5	Female	Cutaneous Melanoma	Metastasis	Soft Tissue	Soft Tissue / Distant LN	IMPACTv5-CLIN-20150396	60.5	0	3080	Skin, arm/shoulder	3	No	0	RAS_OTHER	0	#N/A	#N/A	#N/A	#N/A	#N/A	#N/A	#N/A	#N/A	#N/A	#N/A	#N/A	#N/A	#N/A	#N/A	#N/A	#N/A	#N/A	#N/A	#N/A	#N/A	#N/A
P-0008492-T02-IM5	Male	Cutaneous Melanoma	Metastasis	Lymph node, Regional	LR / In-Transit / Regional LN	IMPACTv5-CLIN-20150409	24.6	1	1761	Skin, scalp	1	No	0	BRAF_CLASS_1_V600E	1	Ipilimumab, Nivolumab	PD-1 combo	1	1	3.22192	14.2356	28	0	180	0.731707	0	1.5	0	9	9	0	0	0	0	M1a	M1a
P-0008557-T02-IM5	Female	Cutaneous Melanoma	Primary	Not Applicable	NA	IMPACTv5-CLIN-20160009	53.8	0	1249	Skin, face	1	Yes	0	NF1	0	#N/A	#N/A	#N/A	#N/A	#N/A	#N/A	#N/A	#N/A	#N/A	#N/A	#N/A	#N/A	#N/A	#N/A	#N/A	#N/A	#N/A	#N/A	#N/A	#N/A	#N/A
P-0008659-T01-IM5	Male	Cutaneous Melanoma	Metastasis	In-transit	LR / In-Transit / Regional LN	IMPACTv5-CLIN-20150407	62	1	1257	Skin, leg/hip	4	No	1	NRAS_Q61	1	Nivolumab	PD-1 Mono	1	1	1.8411	8.21918	65	1	180	0.731707	0	3.16667	0	1	1	0	0	1	1	M1c	M1c
P-0008728-T01-IM5	Female	Cutaneous Melanoma	Metastasis	Soft Tissue	Soft Tissue / Distant LN	IMPACTv5-CLIN-20160004	46.4	0	5160	Skin, arm/shoulder	3	No	0	NF1	1	Ipilimumab, Nivolumab	PD-1 combo	0	0	52.1753	52.1753	56	0	158	0.642276	0	2.58333	0	9	9	0	0	1	0	M1c	M1c
P-0008733-T01-IM5	Male	Cutaneous Melanoma	Metastasis	Lymph node, regional	LR / In-Transit / Regional LN	IMPACTv5-CLIN-20160004	69.1	1	1064	Skin, scalp	1	Yes	0	NRAS_Q61	1	Pembrolizumab	PD-1 Mono	1	1	4.01096	12.2301	71	0	161	0.654472	0	5	1	1	0	0	0	0	1	M1c	M1c
P-0008789-T01-IM5	Male	Cutaneous Melanoma	Metastasis	Lymph node, regional	LR / In-Transit / Regional LN	IMPACTv5-CLIN-20160007R	78.5	0	1273	Skin, trunk	2	Yes	0	BRAF_CLASS_2_3	0	#N/A	#N/A	#N/A	#N/A	#N/A	#N/A	#N/A	#N/A	#N/A	#N/A	#N/A	#N/A	#N/A	#N/A	#N/A	#N/A	#N/A	#N/A	#N/A	#N/A	#N/A
P-0008857-T01-IM5	Female	Cutaneous Melanoma	Metastasis	In-transit	LR / In-Transit / Regional LN	IMPACTv5-CLIN-20160011	72.9	1	1160	Skin, trunk	2	No	0	NF1	1	Pembrolizumab	PD-1 Mono	1	1	21.6658	25.7753	74	0	211	0.857724	0	2.8	0	1	1	1	0	0	1	M1c	M1c
P-0008912-T01-IM5	Female	Melanoma of Unknown Primary	Metastasis	Lymph node, non-regional	Soft Tissue / Distant LN	IMPACTv5-CLIN-20160014	27.1	1	48	Unknown Primary	8	NA	0	NRAS_Q61	1	Ipilimumab, Nivolumab	PD-1 combo	1	1	1.01918	1.01918	27	1	760	3.08943	1	4.63636	0	9	9	1	1	1	1	M1c	M1d
P-0008942-T01-IM5	Male	Cutaneous Melanoma	Metastasis	Liver	Liver	IMPACTv5-CLIN-20160017	61.9	0	3555	Skin, face	1	No	0	NF1	1	Ipilimumab, Nivolumab	PD-1 combo	0	0	50.1699	50.1699	67	0	311	1.26423	1	3.09091	0	9	9	1	0	1	1	M1c	M1c
P-0008946-T01-IM5	Female	Cutaneous Melanoma	Metastasis	Lymph node, Regional	LR / In-Transit / Regional LN	IMPACTv5-CLIN-20160017	82.4	0	2811	Skin, leg/hip	4	No	0	RAS_OTHER	1	Pembrolizumab	PD-1 Mono	0	0	40.8986	40.8986	87	1	Unknown	Unknown	Unknown	3.4375	0	0	1	0	0	0	0	M0	M0
P-0008974-T01-IM5	Male	Cutaneous Melanoma	Metastasis	Bone	Bone	IMPACTv5-CLIN-20160019R	79.5	1	2165	Skin, face	1	No	0	NF1	1	Pembrolizumab	PD-1 Mono	1	1	4.17534	4.17534	85	1	575	2.3374	1	3.44444	0	1	1	0	1	1	0	M1c	M1d
P-0008997-T01-IM5	Female	Cutaneous Melanoma	Metastasis	Liver	Liver	IMPACTv5-CLIN-20160020	48.7	0	4010	Skin, arm/shoulder	3	No	0	NF1	1	Ipilimumab, Nivolumab	PD-1 combo	0	0	52.2082	52.2082	55	1	Unknown	Unknown	Unknown	2.81818	0	9	9	0	0	1	1	M1c	M1c
P-0008999-T01-IM5	Male	Cutaneous Melanoma	Metastasis	Spine	Bone	IMPACTv5-CLIN-20160020	47.6	1	1990	Skin, trunk	2	No	0	NRAS_Q61	1	Ipilimumab, Nivolumab	PD-1 combo	1	1	2.79452	6.2137	53	3	970	3.94309	1	3.83333	0	9	9	0	0	1	1	M1c	M1c
P-0009072-T01-IM5	Male	Melanoma of Unknown Primary	Metastasis	Brain	Brain	IMPACTv5-CLIN-20160028	52.6	1	2189	Unknown Primary	8	NA	0	BRAF_CLASS_1_V600E	1	Ipilimumab, Nivolumab	PD-1 combo	1	1	29.0959	38.137	55	1	195	0.792683	0	4.53846	0	9	9	1	1	0	0	M1c	M1d
P-0009076-T01-IM5	Female	Melanoma of Unknown Primary	Metastasis	Brain	Brain	IMPACTv5-CLIN-20160028	55.8	1	1315	Unknown Primary	8	NA	0	NF1	0	#N/A	#N/A	#N/A	#N/A	#N/A	#N/A	#N/A	#N/A	#N/A	#N/A	#N/A	#N/A	#N/A	#N/A	#N/A	#N/A	#N/A	#N/A	#N/A	#N/A	#N/A
P-0009105-T01-IM5	Female	Melanoma of Unknown Primary	Metastasis	Omentum	Soft Tissue / Distant LN	IMPACTv5-CLIN-20160025	63.7	0	1660	Unknown Primary	8	NA	0	NF1	0	#N/A	#N/A	#N/A	#N/A	#N/A	#N/A	#N/A	#N/A	#N/A	#N/A	#N/A	#N/A	#N/A	#N/A	#N/A	#N/A	#N/A	#N/A	#N/A	#N/A	#N/A
P-0009108-T01-IM5	Male	Melanoma of Unknown Primary	Metastasis	Brain	Brain	IMPACTv5-CLIN-20160026	68.9	0	1638	Unknown Primary	8	NA	0	NF1	1	Ipilimumab, Nivolumab	PD-1 combo	1	0	52.4712	52.4712	69	2	310	1.26016	1	2.42105	0	9	9	1	1	0	0	M1c	M1d
P-0009148-T01-IM5	Male	Cutaneous Melanoma	Metastasis	Brain	Brain	IMPACTv5-CLIN-20160032	34.5	0	5465	Skin, trunk	2	Unknown	0	BRAF_CLASS_1_V600E	0	#N/A	#N/A	#N/A	#N/A	#N/A	#N/A	#N/A	#N/A	#N/A	#N/A	#N/A	#N/A	#N/A	#N/A	#N/A	#N/A	#N/A	#N/A	#N/A	#N/A	#N/A
P-0009177-T01-IM5	Female	Cutaneous Melanoma	Metastasis	Soft Tissue	Soft Tissue / Distant LN	IMPACTv5-CLIN-20160036	37.4	1	6697	Skin, trunk	2	Unknown	0	NRAS_Q61	0	#N/A	#N/A	#N/A	#N/A	#N/A	#N/A	#N/A	#N/A	#N/A	#N/A	#N/A	#N/A	#N/A	#N/A	#N/A	#N/A	#N/A	#N/A	#N/A	#N/A	#N/A
P-0009180-T01-IM5	Female	Cutaneous Melanoma	Metastasis	Lymph node, regional	LR / In-Transit / Regional LN	IMPACTv5-CLIN-20160036	38.2	1	1116	Skin, leg/hip	4	No	0	BRAF_CLASS_1_V600E	0	#N/A	#N/A	#N/A	#N/A	#N/A	#N/A	#N/A	#N/A	#N/A	#N/A	#N/A	#N/A	#N/A	#N/A	#N/A	#N/A	#N/A	#N/A	#N/A	#N/A	#N/A
P-0009189-T01-IM5	Male	Cutaneous Melanoma	Local Recurrence	Not Applicable	LR / In-Transit / Regional LN	IMPACTv5-CLIN-20160035	77.5	0	2528	Skin, scalp	1	No	0	Other_Driver	1	Ipilimumab, Nivolumab	PD-1 combo	0	0	50.2685	50.2685	80	1	203	0.825203	0	2.45	0	9	9	0	0	0	0	M0	M0
P-0009245-T01-IM5	Male	Cutaneous Melanoma	Metastasis	Lung	Lung	IMPACTv5-CLIN-20160030	83.8	1	1375	Skin, arm/shoulder	3	Yes	0	NF1	1	Pembrolizumab	PD-1 Mono	1	1	11.4082	11.4082	87	1	303	1.23171	1	7.5	1	1	0	1	0	0	0	M1c	M1b
P-0009292-T01-IM5	Male	Cutaneous Melanoma	Metastasis	Soft Tissue	Soft Tissue / Distant LN	IMPACTv5-CLIN-20160042	57.6	0	2091	Skin, trunk	2	No	0	BRAF_CLASS_1_V600E	1	Pembrolizumab	PD-1 Mono	1	0	6.87123	47.8027	59	1	Unknown	Unknown	Unknown	2.78571	0	0	1	0	0	0	0	M0	M0
P-0009308-T01-IM5	Female	Cutaneous Melanoma	Metastasis	Lymph node, regional	LR / In-Transit / Regional LN	IMPACTv5-CLIN-20160043	45.2	1	1838	Skin, leg/hip	4	No	0	NRAS_Q61	1	Ipilimumab, Nivolumab	PD-1 combo	1	1	11.7041	27.189	48	0	181	0.735772	0	2.83333	0	9	9	0	0	0	0	M1c	M1c
P-0009311-T01-IM5	Female	Cutaneous Melanoma	Metastasis	Lymph node, regional	LR / In-Transit / Regional LN	IMPACTv5-CLIN-20160043	70.9	1	1185	Skin, arm/shoulder	3	No	1	NF1	1	Ipilimumab, Nivolumab	PD-1 combo	1	1	5.29315	7.00274	74	1	237	0.963415	0	2.53846	0	9	9	0	0	0	1	M1c	M1c
P-0009324-T02-IM5	Male	Melanoma of Unknown Primary	Metastasis	Soft Tissue	Soft Tissue / Distant LN	IMPACTv5-CLIN-20160046	86.9	1	1151	Unknown Primary	8	NA	0	Unknown_Driver	1	Pembrolizumab	PD-1 Mono	1	1	36.6247	36.6247	87	1	226	0.918699	0	2.26667	0	0	1	0	0	0	0	M0	M0
P-0009345-T01-IM5	Female	Cutaneous Melanoma	Primary	Not Applicable	NA	IMPACTv5-CLIN-20160041	53.6	0	1843	Skin, scalp	1	No	0	BRAF_CLASS_1_Other	1	Ipilimumab, Nivolumab	PD-1 combo	0	0	50.137	50.137	55	0	223	0.906504	0	2.21429	0	9	9	0	0	0	1	M1c	M1c
P-0009349-T01-IM5	Female	Cutaneous Melanoma	Metastasis	Abdomen	Soft Tissue / Distant LN	IMPACTv5-CLIN-20160041	81.2	0	3688	Skin, neck	1	Yes	0	NF1	1	Pembrolizumab	PD-1 Mono	0	0	50.5644	50.5644	87	1	228	0.926829	0	1.85	0	0	1	0	0	0	0	M1a	M1a
P-0009412-T01-IM5	Male	Cutaneous Melanoma	Metastasis	Lung	Lung	IMPACTv5-CLIN-20160048	65	0	8553	Skin, arm/shoulder	3	No	0	BRAF_CLASS_1_V600E	0	#N/A	#N/A	#N/A	#N/A	#N/A	#N/A	#N/A	#N/A	#N/A	#N/A	#N/A	#N/A	#N/A	#N/A	#N/A	#N/A	#N/A	#N/A	#N/A	#N/A	#N/A
P-0009527-T01-IM5	Female	Cutaneous Melanoma	Metastasis	Soft Tissue	Soft Tissue / Distant LN	IMPACTv5-CLIN-20160055	38.7	0	2233	Skin, trunk	2	Yes	0	BRAF_CLASS_1_V600E	0	#N/A	#N/A	#N/A	#N/A	#N/A	#N/A	#N/A	#N/A	#N/A	#N/A	#N/A	#N/A	#N/A	#N/A	#N/A	#N/A	#N/A	#N/A	#N/A	#N/A	#N/A
P-0009538-T01-IM5	Male	Cutaneous Melanoma	Metastasis	Liver	Liver	IMPACTv5-CLIN-20160059	58.9	0	10308	Skin, trunk	2	Unknown	0	BRAF_CLASS_1_V600E	0	#N/A	#N/A	#N/A	#N/A	#N/A	#N/A	#N/A	#N/A	#N/A	#N/A	#N/A	#N/A	#N/A	#N/A	#N/A	#N/A	#N/A	#N/A	#N/A	#N/A	#N/A
P-0009589-T01-IM5	Male	Cutaneous Melanoma	Metastasis	In-transit	LR / In-Transit / Regional LN	IMPACTv5-CLIN-20160061	39.3	0	2026	Skin, leg/hip	4	Yes	0	Unknown_Driver	0	#N/A	#N/A	#N/A	#N/A	#N/A	#N/A	#N/A	#N/A	#N/A	#N/A	#N/A	#N/A	#N/A	#N/A	#N/A	#N/A	#N/A	#N/A	#N/A	#N/A	#N/A
P-0009697-T01-IM5	Male	Melanoma of Unknown Primary	Metastasis	Testis	Other Visceral	IMPACTv5-CLIN-20160067	30.9	0	53	Unknown Primary	8	NA	0	BRAF_CLASS_1_V600E	0	#N/A	#N/A	#N/A	#N/A	#N/A	#N/A	#N/A	#N/A	#N/A	#N/A	#N/A	#N/A	#N/A	#N/A	#N/A	#N/A	#N/A	#N/A	#N/A	#N/A	#N/A
P-0009736-T01-IM5	Male	Cutaneous Melanoma	Metastasis	Soft Tissue	Soft Tissue / Distant LN	IMPACTv5-CLIN-20160065	25.2	0	15554	Skin, neck	1	Unknown	0	BRAF_CLASS_1_V600E	1	Ipilimumab, Nivolumab	PD-1 Combo	1	0	31.5288	48.8548	64	1	188	0.764228	0	10.8571	1	9	9	0	0	0	0	M1a	M1a
P-0009744-T01-IM5	Male	Cutaneous Melanoma	Metastasis	Lung	Lung	IMPACTv5-CLIN-20160069	56	0	1188	Skin, arm/shoulder	3	No	0	NRAS_Q61	0	#N/A	#N/A	#N/A	#N/A	#N/A	#N/A	#N/A	#N/A	#N/A	#N/A	#N/A	#N/A	#N/A	#N/A	#N/A	#N/A	#N/A	#N/A	#N/A	#N/A	#N/A
P-0009747-T01-IM5	Male	Cutaneous Melanoma	Primary	Not Applicable	NA	IMPACTv5-CLIN-20160069	81	1	790	Skin, scalp	1	No	0	NF1	1	Pembrolizumab	PD-1 Mono	1	1	3.05753	18.6082	82	1	165	0.670732	0	2.19048	0	1	1	1	0	0	0	M1b	M1b
P-0009752-T01-IM5	Male	Cutaneous Melanoma	Metastasis	Soft Tissue	Soft Tissue / Distant LN	IMPACTv5-CLIN-20160070	67.8	0	659	Skin, face	1	No	0	NF1	0	#N/A	#N/A	#N/A	#N/A	#N/A	#N/A	#N/A	#N/A	#N/A	#N/A	#N/A	#N/A	#N/A	#N/A	#N/A	#N/A	#N/A	#N/A	#N/A	#N/A	#N/A
P-0009855-T01-IM5	Female	Cutaneous Melanoma	Metastasis	Duodenum	Other Visceral	IMPACTv5-CLIN-20160073	35.2	1	1207	Skin, trunk	2	Yes	1	NRAS_Q61	0	#N/A	#N/A	#N/A	#N/A	#N/A	#N/A	#N/A	#N/A	#N/A	#N/A	#N/A	#N/A	#N/A	#N/A	#N/A	#N/A	#N/A	#N/A	#N/A	#N/A	#N/A
P-0009950-T01-IM5	Male	Melanoma of Unknown Primary	Metastasis	Brain	Brain	IMPACTv5-CLIN-20160081	57.9	0	1533	Unknown Primary	8	NA	0	NF1	1	Ipilimumab, Nivolumab	PD-1 combo	0	0	48.8219	48.8219	58	1	287	1.16667	1	5.55556	1	9	9	1	1	0	0	M1c	M1d
P-0010005-T01-IM5	Male	Cutaneous Melanoma	Primary	Not Applicable	NA	IMPACTv5-CLIN-20160084	15.3	0	1262	Skin, external ear	1	No	0	Unknown_Driver	0	#N/A	#N/A	#N/A	#N/A	#N/A	#N/A	#N/A	#N/A	#N/A	#N/A	#N/A	#N/A	#N/A	#N/A	#N/A	#N/A	#N/A	#N/A	#N/A	#N/A	#N/A
P-0010008-T01-IM5	Male	Cutaneous Melanoma	Metastasis	Liver	Liver	IMPACTv5-CLIN-20160084	61.6	1	1838	Skin, trunk	2	No	0	NRAS_Q61	1	Ipilimumab, Nivolumab	PD-1 combo	1	1	1.70959	1.70959	67	3	965	3.92276	1	9.25	1	9	9	0	1	1	1	M1c	M1d
P-0010115-T01-IM5	Male	Melanoma of Unknown Primary	Metastasis	Lung	Lung	IMPACTv5-CLIN-20160090	52.3	0	1468	Unknown Primary	8	NA	0	NF1	1	Pembrolizumab	PD-1 Mono	0	0	46.7507	46.7507	52	0	157	0.638211	0	4.16667	0	1	0	1	0	0	0	M1b	M1b
P-0010140-T02-IM5	Female	Cutaneous Melanoma	Metastasis	In-transit	LR / In-Transit / Regional LN	IMPACTv5-CLIN-20160324	43.5	0	1638	Skin, trunk	2	Yes	0	BRAF_CLASS_1_V600E	0	#N/A	#N/A	#N/A	#N/A	#N/A	#N/A	#N/A	#N/A	#N/A	#N/A	#N/A	#N/A	#N/A	#N/A	#N/A	#N/A	#N/A	#N/A	#N/A	#N/A	#N/A
P-0010232-T01-IM5	Male	Cutaneous Melanoma	Metastasis	Soft Tissue	Soft Tissue / Distant LN	IMPACTv5-CLIN-20160098	47.3	0	2961	Skin, trunk	2	No	0	NRAS_Q61	1	Ipilimumab, Nivolumab	PD-1 Combo	0	0	48.6247	48.6247	51	0	177	0.719512	0	1.31818	0	9	9	0	0	0	0	M0	M0
P-0010249-T01-IM5	Male	Cutaneous Melanoma	Metastasis	Muscle	Other Visceral	IMPACTv5-CLIN-20160101	60.7	1	2820	Skin, arm/shoulder	3	No	0	NF1	0	#N/A	#N/A	#N/A	#N/A	#N/A	#N/A	#N/A	#N/A	#N/A	#N/A	#N/A	#N/A	#N/A	#N/A	#N/A	#N/A	#N/A	#N/A	#N/A	#N/A	#N/A
P-0010340-T01-IM5	Male	Melanoma of Unknown Primary	Metastasis	Brain	Brain	IMPACTv5-CLIN-20160110	51.2	0	1475	Unknown Primary	8	NA	0	NF1	1	Ipilimumab, Nivolumab	PD-1 combo	0	0	47.5726	47.5726	51	1	223	0.906504	0	19.1818	1	9	9	1	1	0	0	M1c	M1d
P-0010495-T01-IM5	Female	Cutaneous Melanoma	Metastasis	Brain	Brain	IMPACTv5-CLIN-20160117	69.5	1	636	Skin, leg/hip	4	Yes	0	NRAS_Q61	1	Pembrolizumab	PD-1 Mono	1	1	1.70959	2.26849	71	2	214	0.869919	0	4.9	1	0	0	0	1	0	0	M1c	M1d
P-0010670-T01-IM5	Male	Melanoma of Unknown Primary	Metastasis	Soft Tissue	Soft Tissue / Distant LN	IMPACTv5-CLIN-20160119	71	0	1144	Unknown Primary	8	NA	0	BRAF_CLASS_1_V600E	0	#N/A	#N/A	#N/A	#N/A	#N/A	#N/A	#N/A	#N/A	#N/A	#N/A	#N/A	#N/A	#N/A	#N/A	#N/A	#N/A	#N/A	#N/A	#N/A	#N/A	#N/A
P-0010726-T01-IM5	Male	Melanoma of Unknown Primary	Metastasis	Soft Tissue	Soft Tissue / Distant LN	IMPACTv5-CLIN-20160131	66.8	0	1477	Unknown Primary	8	NA	0	NF1	1	Nivolumab	PD-1 Mono	0	0	22.389	22.389	69	0	Unknown	Unknown	Unknown	3.77778	0	1	1	1	0	0	0	M1b	M1b
P-0010805-T01-IM5	Male	Cutaneous Melanoma	Metastasis	Lymph Node, Non-Regional	Soft Tissue / Distant LN	IMPACTv5-CLIN-20160141	19.7	1	774	Skin, face	1	Yes	1	NRAS_Q61	1	Ipilimumab, Nivolumab	PD-1 combo	1	1	1.44658	9.0411	21	Unknown	Unknown	Unknown	Unknown	Unknown	Unknown	9	9	0	0	0	0	M1c	M1c
P-0010818-T01-IM5	Male	Cutaneous Melanoma	Metastasis	In-transit	LR / In-Transit / Regional LN	IMPACTv5-CLIN-20160138	84	1	519	Skin, leg/hip	4	No	1	Unknown_Driver	1	Pembrolizumab	PD-1 Mono	1	1	5.98356	10.4219	85	0	164	0.666667	0	2.15	0	1	1	0	0	0	0	M0	M0
P-0010847-T01-IM5	Male	Cutaneous Melanoma	Primary	Not Applicable	NA	IMPACTv5-CLIN-20160136	57.5	0	1918	Skin, arm/shoulder	3	No	0	NF1	1	Pembrolizumab	PD-1 Mono	1	0	2.76164	50.663	59	0	188	0.764228	0	4.76923	1	1	0	0	0	0	0	M1a	M1a
P-0010848-T01-IM5	Male	Melanoma of Unknown Primary	Metastasis	Brain	Brain	IMPACTv5-CLIN-20160136	62.1	1	837	Unknown Primary	8	NA	0	BRAF_CLASS_1_V600E	0	#N/A	#N/A	#N/A	#N/A	#N/A	#N/A	#N/A	#N/A	#N/A	#N/A	#N/A	#N/A	#N/A	#N/A	#N/A	#N/A	#N/A	#N/A	#N/A	#N/A	#N/A
P-0010915-T01-IM5	Female	Cutaneous Melanoma	Primary	Not Applicable	NA	IMPACTv5-CLIN-20160142	69	1	552	Skin, leg/hip	4	Yes	0	BRAF_CLASS_2_3	1	Pembrolizumab	PD-1 Mono	1	1	2.99178	13.3151	69	0	306	1.2439	1	1.4	0	0	1	0	0	0	0	M1c	M0
P-0010937-T01-IM5	Male	Cutaneous Melanoma	Metastasis	In-transit	LR / In-Transit / Regional LN	IMPACTv5-CLIN-20160145	73.6	1	2349	Skin, leg/hip	4	No	1	RAS_OTHER	0	#N/A	#N/A	#N/A	#N/A	#N/A	#N/A	#N/A	#N/A	#N/A	#N/A	#N/A	#N/A	#N/A	#N/A	#N/A	#N/A	#N/A	#N/A	#N/A	#N/A	#N/A
P-0010975-T01-IM5	Female	Cutaneous Melanoma	Metastasis	Lung	Lung	IMPACTv5-CLIN-20160149	61.3	1	239	Skin, trunk	2	Yes	0	NRAS_Q61	1	Pembrolizumab	PD-1 Mono	1	1	0.19726	0.19726	62	3	2685	10.9146	1	7	1	0	0	1	1	1	1	M1c	M1d
P-0011047-T01-IM5	Female	Cutaneous Melanoma	Metastasis	Parotid	LR / In-Transit / Regional LN	IMPACTv5-CLIN-20160153	79.2	0	1874	Skin, face	1	Yes	0	KIT_PDGFRA	1	Pembrolizumab	PD-1 Mono	0	0	41.8849	41.8849	81	0	582	2.36585	1	3.64286	0	1	1	1	0	0	1	M1c	M1c
P-0011081-T01-IM5	Female	Cutaneous Melanoma	Metastasis	Soft Tissue	Soft Tissue / Distant LN	IMPACTv5-CLIN-20160152	70.9	1	1181	Skin, leg/hip	4	Unknown	0	NRAS_Q61	0	#N/A	#N/A	#N/A	#N/A	#N/A	#N/A	#N/A	#N/A	#N/A	#N/A	#N/A	#N/A	#N/A	#N/A	#N/A	#N/A	#N/A	#N/A	#N/A	#N/A	#N/A
P-0011216-T01-IM5	Female	Melanoma of Unknown Primary	Metastasis	Lymph node, Regional	LR / In-Transit / Regional LN	IMPACTv5-CLIN-20160162	50.4	1	785	Unknown Primary	8	NA	0	BRAF_CLASS_1_V600E	0	#N/A	#N/A	#N/A	#N/A	#N/A	#N/A	#N/A	#N/A	#N/A	#N/A	#N/A	#N/A	#N/A	#N/A	#N/A	#N/A	#N/A	#N/A	#N/A	#N/A	#N/A
P-0011269-T01-IM5	Male	Cutaneous Melanoma	Primary	Not Applicable	NA	IMPACTv5-CLIN-20160163	64.5	0	1659	Skin, scalp	1	No	0	BRAF_CLASS_1_Other	1	Ipilimumab, Nivolumab	PD-1 Combo	0	0	45.7644	45.7644	65	0	171	0.695122	0	1.625	0	9	9	0	0	0	0	M0	M0
P-0011297-T02-IM5	Male	Cutaneous Melanoma	Metastasis	Ileum	Other Visceral	IMPACTv5-CLIN-20160237	39.2	0	3413	Skin, leg/hip	4	Yes	0	NRAS_Q61	0	#N/A	#N/A	#N/A	#N/A	#N/A	#N/A	#N/A	#N/A	#N/A	#N/A	#N/A	#N/A	#N/A	#N/A	#N/A	#N/A	#N/A	#N/A	#N/A	#N/A	#N/A
P-0011467-T01-IM5	Female	Cutaneous Melanoma	Metastasis	Lymph node, Regional	LR / In-Transit / Regional LN	IMPACTv5-CLIN-20160182	48.7	0	768	Skin, trunk	2	No	0	NF1	0	#N/A	#N/A	#N/A	#N/A	#N/A	#N/A	#N/A	#N/A	#N/A	#N/A	#N/A	#N/A	#N/A	#N/A	#N/A	#N/A	#N/A	#N/A	#N/A	#N/A	#N/A
P-0011476-T01-IM5	Male	Cutaneous Melanoma	Metastasis	Lymph node, Regional	LR / In-Transit / Regional LN	IMPACTv5-CLIN-20160182	47.4	0	2114	Skin, leg/hip	4	No	0	BRAF_CLASS_1_V600E	1	Pembrolizumab	PD-1 Mono	1	0	3.61644	44.2192	50	0	162	0.658537	0	1.4	0	0	1	0	0	0	0	M0	M0
P-0011594-T01-IM5	Female	Cutaneous Melanoma	Metastasis	In-transit	LR / In-Transit / Regional LN	IMPACTv5-CLIN-20160191	44.1	0	5473	Skin, arm/shoulder	3	No	0	BRAF_CLASS_1_V600E	0	#N/A	#N/A	#N/A	#N/A	#N/A	#N/A	#N/A	#N/A	#N/A	#N/A	#N/A	#N/A	#N/A	#N/A	#N/A	#N/A	#N/A	#N/A	#N/A	#N/A	#N/A
P-0012080-T01-IM5	Male	Cutaneous Melanoma	Metastasis	Soft Tissue	Soft Tissue / Distant LN	IMPACTv5-CLIN-20160207	58.4	0	1617	Skin, trunk	2	Yes	0	NRAS_Q61	1	Ipilimumab, Nivolumab	PD-1 Combo	1	0	28.3397	46.0274	59	0	176	0.715447	0	1.05714	0	9	9	1	0	0	1	M1c	M1c
P-0012119-T01-IM5	Male	Melanoma of Unknown Primary	Metastasis	Lymph Node, Regional	LR / In-Transit / Regional LN	IMPACTv5-CLIN-20160200	56.9	0	1525	Unknown Primary	8	NA	0	NRAS_Q61	1	Ipilimumab, Nivolumab	PD-1 Combo	0	0	48.0329	48.0329	57	0	184	0.747967	0	11.9	1	9	9	0	0	0	0	M1a	M1a
P-0012194-T01-IM5	Male	Cutaneous Melanoma	Primary	Not Applicable	NA	IMPACTv5-CLIN-20160207	41.8	1	2075	Skin, scalp	1	No	0	Other_Driver	1	Ipilimumab, Nivolumab	PD-1 combo	1	1	1.9726	7.10137	46	1	Unknown	Unknown	Unknown	Unknown	Unknown	9	9	0	0	0	1	M1c	M1c
P-0012315-T01-IM5	Female	Melanoma of Unknown Primary	Metastasis	Brain	Brain	IMPACTv5-CLIN-20160212	61.6	1	948	Unknown Primary	8	NA	0	BRAF_CLASS_1_V600E	1	Pembrolizumab	PD-1 Mono	1	1	8.51507	28.1425	62	1	210	0.853659	0	3.09524	0	0	1	0	1	0	0	M1c	M1d
P-0012361-T01-IM5	Male	Cutaneous Melanoma	Metastasis	Brain	Brain	IMPACTv5-CLIN-20160211	63.4	1	3463	Skin, face	1	Unknown	0	BRAF_CLASS_1_V600E	0	#N/A	#N/A	#N/A	#N/A	#N/A	#N/A	#N/A	#N/A	#N/A	#N/A	#N/A	#N/A	#N/A	#N/A	#N/A	#N/A	#N/A	#N/A	#N/A	#N/A	#N/A
P-0012407-T01-IM5	Female	Cutaneous Melanoma	Metastasis	Lung	Lung	IMPACTv5-CLIN-20160219	45.4	0	2619	Skin, arm/shoulder	3	No	0	NRAS_Q61	1	Ipilimumab, Nivolumab	PD-1 Combo	0	0	43.2986	43.2986	49	1	Unknown	Unknown	Unknown	3.77778	0	9	9	1	1	0	0	M1c	M1d
P-0012408-T01-IM5	Male	Cutaneous Melanoma	Metastasis	Brain	Brain	IMPACTv5-CLIN-20160219	79.9	1	1829	Skin, trunk	2	Unknown	0	BRAF_CLASS_2_3	1	Pembrolizumab	PD-1 Mono	1	1	23.3753	24.6247	83	0	277	1.12602	1	5.8	1	0	0	0	1	0	0	M1c	M1d
P-0012420-T01-IM5	Male	Cutaneous Melanoma	Metastasis	Brain	Brain	IMPACTv5-CLIN-20160219	64	0	4740	Skin, trunk	2	No	0	BRAF_CLASS_1_Other	1	Pembrolizumab	PD-1 Mono	0	0	41.8521	41.8521	74	0	181	0.735772	0	2.35714	0	0	0	1	1	0	0	M1c	M1d
P-0012446-T01-IM5	Female	Cutaneous Melanoma	Metastasis	Lung	Lung	IMPACTv5-CLIN-20160222	29.2	0	7101	Skin, trunk	2	No	0	BRAF_CLASS_1_V600E	1	Ipilimumab, Nivolumab	PD-1 combo	0	0	44.9753	44.9753	44	0	144	0.585366	0	3.1875	0	9	9	1	0	0	0	M1b	M1b
P-0012529-T01-IM5	Male	Melanoma of Unknown Primary	Metastasis	Adrenal Gland	Other Visceral	IMPACTv5-CLIN-20160224	47.6	1	184	Unknown Primary	8	NA	0	BRAF_CLASS_1_V600E	0	#N/A	#N/A	#N/A	#N/A	#N/A	#N/A	#N/A	#N/A	#N/A	#N/A	#N/A	#N/A	#N/A	#N/A	#N/A	#N/A	#N/A	#N/A	#N/A	#N/A	#N/A
P-0012550-T01-IM5	Female	Melanoma of Unknown Primary	Metastasis	Lung	Lung	IMPACTv5-CLIN-20160230	59.4	0	1359	Unknown Primary	8	NA	0	NF1	1	Pembrolizumab	PD-1 Mono	0	0	38.7945	38.7945	60	0	182	0.739837	0	2.66667	0	1	1	1	0	0	0	M1b	M1b
P-0012551-T01-IM5	Female	Cutaneous Melanoma	Metastasis	Lung	Lung	IMPACTv5-CLIN-20160230	49.5	1	4890	Skin, arm/shoulder	3	No	0	BRAF_CLASS_1_V600E	1	Ipilimumab, Nivolumab	PD-1 combo	1	1	1.87397	26.8274	60	0	179	0.727642	0	1	0	9	9	1	0	0	1	M1c	M1c
P-0012783-T01-IM5	Male	Cutaneous Melanoma	Primary	Not Applicable	NA	IMPACTv5-CLIN-20160242	59.4	1	1744	Skin, arm/shoulder	3	Yes	0	BRAF_CLASS_1_Other	1	Ipilimumab, Nivolumab	PD-1 Combo	1	1	43.3315	43.3315	61	0	195	0.792683	0	3	0	9	9	0	0	0	0	M1a	M1a
P-0012822-T01-IM5	Female	Melanoma of Unknown Primary	Metastasis	Soft Tissue	Soft Tissue / Distant LN	IMPACTv5-CLIN-20160247	77.1	1	223	Unknown Primary	8	NA	0	Unknown_Driver	1	Ipilimumab, Nivolumab	PD-1 Combo	1	1	1.08493	2.30137	77	0	1066	4.33333	1	5.2	1	9	9	1	1	0	0	M1c	M1d
P-0012856-T01-IM5	Male	Cutaneous Melanoma	Metastasis	Lung	Lung	IMPACTv5-CLIN-20160251	56.4	0	1975	Skin, scalp	1	Yes	0	NF1	1	Pembrolizumab	PD-1 Mono	0	0	48.6575	48.6575	58	1	Unknown	Unknown	Unknown	2.26316	0	1	1	1	0	0	0	M1b	M1b
P-0012860-T01-IM5	Male	Cutaneous Melanoma	Metastasis	Lung	Lung	IMPACTv5-CLIN-20160248	83.5	0	1384	Skin, scalp	1	No	0	NF1	1	Pembrolizumab	PD-1 Mono	0	0	28.7671	28.7671	85	1	276	1.12195	1	3.6	0	0	0	1	0	0	0	M1c	M1b
P-0012865-T01-IM5	Female	Cutaneous Melanoma	Metastasis	Lymph node, Regional	LR / In-Transit / Regional LN	IMPACTv5-CLIN-20160248	62.4	0	1245	Skin, eyelid	1	No	0	NF1	0	#N/A	#N/A	#N/A	#N/A	#N/A	#N/A	#N/A	#N/A	#N/A	#N/A	#N/A	#N/A	#N/A	#N/A	#N/A	#N/A	#N/A	#N/A	#N/A	#N/A	#N/A
P-0012869-T01-IM5	Female	Cutaneous Melanoma	Metastasis	Soft Tissue	Soft Tissue / Distant LN	IMPACTv5-CLIN-20160248	16.9	1	2620	Skin, neck	1	Yes	0	BRAF_CLASS_1_V600E	0	#N/A	#N/A	#N/A	#N/A	#N/A	#N/A	#N/A	#N/A	#N/A	#N/A	#N/A	#N/A	#N/A	#N/A	#N/A	#N/A	#N/A	#N/A	#N/A	#N/A	#N/A
P-0012884-T01-IM5	Male	Cutaneous Melanoma	Metastasis	Soft Tissue	Soft Tissue / Distant LN	IMPACTv5-CLIN-20160249	48	0	1903	Skin, leg/hip	4	No	1	BRAF_CLASS_2_3	0	#N/A	#N/A	#N/A	#N/A	#N/A	#N/A	#N/A	#N/A	#N/A	#N/A	#N/A	#N/A	#N/A	#N/A	#N/A	#N/A	#N/A	#N/A	#N/A	#N/A	#N/A
P-0012924-T01-IM5	Female	Melanoma of Unknown Primary	Metastasis	Soft Tissue	Soft Tissue / Distant LN	IMPACTv5-CLIN-20160244	22.2	0	97	Unknown Primary	8	NA	0	Other_Driver	0	#N/A	#N/A	#N/A	#N/A	#N/A	#N/A	#N/A	#N/A	#N/A	#N/A	#N/A	#N/A	#N/A	#N/A	#N/A	#N/A	#N/A	#N/A	#N/A	#N/A	#N/A
P-0012968-T01-IM5	Male	Cutaneous Melanoma	Metastasis	Lymph Node, Non-Regional	Soft Tissue / Distant LN	IMPACTv5-CLIN-20160255	59.1	0	2000	Skin, trunk	2	No	0	BRAF_CLASS_2_3	1	Ipilimumab, Nivolumab	PD-1 Combo	0	0	42.6411	42.6411	61	1	543	2.20732	1	3.0625	0	9	9	1	0	0	0	M1c	M1b
P-0012999-T01-IM5	Male	Cutaneous Melanoma	Metastasis	Soft Tissue	Soft Tissue / Distant LN	IMPACTv5-CLIN-20160257	50.4	1	7810	Skin, face	1	Unknown	0	NF1	0	#N/A	#N/A	#N/A	#N/A	#N/A	#N/A	#N/A	#N/A	#N/A	#N/A	#N/A	#N/A	#N/A	#N/A	#N/A	#N/A	#N/A	#N/A	#N/A	#N/A	#N/A
P-0013030-T02-IM6	Male	Cutaneous Melanoma	Metastasis	Brain	Brain	IMPACTv6-CLIN-20180516	54.8	0	671	Skin, trunk	2	Yes	0	NF1	0	#N/A	#N/A	#N/A	#N/A	#N/A	#N/A	#N/A	#N/A	#N/A	#N/A	#N/A	#N/A	#N/A	#N/A	#N/A	#N/A	#N/A	#N/A	#N/A	#N/A	#N/A
P-0013111-T01-IM5	Male	Cutaneous Melanoma	Metastasis	In-transit	LR / In-Transit / Regional LN	IMPACTv5-CLIN-20160266	68.4	0	1846	Skin, external ear	1	No	0	NRAS_Q61	1	Pembrolizumab	PD-1 Mono	1	0	1.77534	48.7233	69	0	207	0.841463	0	4.75	1	1	0	0	0	0	0	M0	M0
P-0013166-T01-IM5	Female	Melanoma of Unknown Primary	Metastasis	Lung	Lung	IMPACTv5-CLIN-20160269	68.8	0	49	Unknown Primary	8	NA	0	BRAF_CLASS_1_Other	0	#N/A	#N/A	#N/A	#N/A	#N/A	#N/A	#N/A	#N/A	#N/A	#N/A	#N/A	#N/A	#N/A	#N/A	#N/A	#N/A	#N/A	#N/A	#N/A	#N/A	#N/A
P-0013180-T01-IM5	Male	Cutaneous Melanoma	Metastasis	Lymph Node, Regional	LR / In-Transit / Regional LN	IMPACTv5-CLIN-20160270	55.2	0	349	Skin, trunk	2	No	0	NRAS_Q61	0	#N/A	#N/A	#N/A	#N/A	#N/A	#N/A	#N/A	#N/A	#N/A	#N/A	#N/A	#N/A	#N/A	#N/A	#N/A	#N/A	#N/A	#N/A	#N/A	#N/A	#N/A
P-0013232-T01-IM5	Male	Cutaneous Melanoma	Metastasis	Lymph node, Regional	LR / In-Transit / Regional LN	IMPACTv5-CLIN-20160273	60	0	2320	Skin, neck	1	Unknown	0	NF1	1	Pembrolizumab	PD-1 Mono	0	0	35.6712	35.6712	63	0	Unknown	Unknown	Unknown	0.0797872	0	0	1	0	0	0	0	M0	M0
P-0013274-T01-IM5	Male	Cutaneous Melanoma	Metastasis	Lymph node, Regional	LR / In-Transit / Regional LN	IMPACTv5-CLIN-20160275R	64.5	1	1185	Skin, face	1	Yes	0	NRAS_Q61	0	#N/A	#N/A	#N/A	#N/A	#N/A	#N/A	#N/A	#N/A	#N/A	#N/A	#N/A	#N/A	#N/A	#N/A	#N/A	#N/A	#N/A	#N/A	#N/A	#N/A	#N/A
P-0013318-T01-IM5	Male	Melanoma of Unknown Primary	Metastasis	Lymph node, Regional	LR / In-Transit / Regional LN	IMPACTv5-CLIN-20160278	67.4	0	1450	Unknown Primary	8	NA	1	NRAS_Q61	1	Pembrolizumab	PD-1 Mono	1	0	3.97808	45.6329	68	1	206	0.837398	0	1.9	0	1	1	0	0	0	0	M0	M0
P-0013341-T01-IM5	Male	Cutaneous Melanoma	Metastasis	In-transit	LR / In-Transit / Regional LN	IMPACTv5-CLIN-20160283	39.5	0	6927	Skin, arm/shoulder	3	No	0	BRAF_CLASS_1_V600E	1	Ipilimumab, Nivolumab	PD-1 Combo	0	0	37.6767	37.6767	55	1	Unknown	Unknown	Unknown	1.85714	0	9	9	1	0	0	0	M1b	M1b
P-0013356-T01-IM5	Male	Cutaneous Melanoma	Metastasis	Lymph Node, Non-Regional	Soft Tissue / Distant LN	IMPACTv5-CLIN-20160279	64.9	0	1521	Skin, scalp	1	No	0	NF1	0	#N/A	#N/A	#N/A	#N/A	#N/A	#N/A	#N/A	#N/A	#N/A	#N/A	#N/A	#N/A	#N/A	#N/A	#N/A	#N/A	#N/A	#N/A	#N/A	#N/A	#N/A
P-0013383-T01-IM5	Female	Cutaneous Melanoma	Metastasis	Brain	Brain	IMPACTv5-CLIN-20160292	79	0	3211	Skin, scalp	1	Unknown	0	NF1	1	Ipilimumab, Nivolumab	PD-1 combo	1	0	4.63562	43.7918	85	0	159	0.646341	0	3.33333	0	9	9	1	1	0	1	M1c	M1d
P-0013389-T01-IM5	Male	Melanoma of Unknown Primary	Metastasis	Soft Tissue	Soft Tissue / Distant LN	IMPACTv5-CLIN-20160286	69	0	1421	Unknown Primary	8	NA	0	BRAF_CLASS_2_3	1	Pembrolizumab	PD-1 Mono	0	0	45.6	45.6	69	1	Unknown	Unknown	Unknown	3.16667	0	1	1	0	0	1	0	M1c	M1c
P-0013413-T01-IM5	Male	Melanoma of Unknown Primary	Metastasis	Lung	Lung	IMPACTv5-CLIN-20160284	75.5	1	627	Unknown Primary	8	NA	1	NRAS_Q61	1	Nivolumab	PD-1 Mono	1	1	5.95068	19.463	76	1	Unknown	Unknown	Unknown	Unknown	Unknown	Unknown	Unknown	1	0	0	0	M1b	M1b
P-0013448-T01-IM5	Male	Cutaneous Melanoma	Metastasis	Soft Tissue	Soft Tissue / Distant LN	IMPACTv5-CLIN-20160285	82.1	0	1585	Skin, arm/shoulder	3	Yes	0	NRAS_Q61	1	Pembrolizumab	PD-1 Mono	0	0	43.5945	43.5945	83	1	170	0.691057	0	2.15	0	1	1	0	0	0	1	M1c	M1c
P-0013451-T01-IM5	Female	Cutaneous Melanoma	Metastasis	Soft Tissue	Soft Tissue / Distant LN	IMPACTv5-CLIN-20160285	35.1	0	9883	Skin, leg/hip	4	Unknown	1	Other_Driver	1	Ipilimumab, Nivolumab	PD-1 Combo	1	0	4.50411	47.6055	58	0	292	1.18699	1	4.26316	0	9	9	0	0	0	0	M1c	M1c
P-0013481-T01-IM5	Male	Cutaneous Melanoma	Metastasis	Lung	Lung	IMPACTv5-CLIN-20160288R	73.1	1	1204	Skin, arm/shoulder	3	Yes	0	NF1	0	#N/A	#N/A	#N/A	#N/A	#N/A	#N/A	#N/A	#N/A	#N/A	#N/A	#N/A	#N/A	#N/A	#N/A	#N/A	#N/A	#N/A	#N/A	#N/A	#N/A	#N/A
P-0013525-T01-IM5	Female	Cutaneous Melanoma	Metastasis	Soft Tissue	Soft Tissue / Distant LN	IMPACTv5-CLIN-20160290R	60.1	0	4816	Skin, leg/hip	4	No	0	BRAF_CLASS_1_V600E	1	Ipilimumab, Nivolumab	PD-1 Combo	0	0	48.2301	48.2301	69	0	235	0.955285	0	1.38462	0	9	9	0	0	0	0	M1a	M1a
P-0013596-T01-IM5	Male	Cutaneous Melanoma	Primary	Not Applicable	NA	IMPACTv5-CLIN-20160297	57	1	548	Skin, trunk	2	Yes	0	BRAF_CLASS_1_Other	0	#N/A	#N/A	#N/A	#N/A	#N/A	#N/A	#N/A	#N/A	#N/A	#N/A	#N/A	#N/A	#N/A	#N/A	#N/A	#N/A	#N/A	#N/A	#N/A	#N/A	#N/A
P-0013598-T01-IM5	Male	Melanoma of Unknown Primary	Metastasis	Lymph node, Regional	LR / In-Transit / Regional LN	IMPACTv5-CLIN-20160297	71.2	0	677	Unknown Primary	8	NA	0	BRAF_CLASS_2_3	0	#N/A	#N/A	#N/A	#N/A	#N/A	#N/A	#N/A	#N/A	#N/A	#N/A	#N/A	#N/A	#N/A	#N/A	#N/A	#N/A	#N/A	#N/A	#N/A	#N/A	#N/A
P-0013659-T01-IM5	Male	Cutaneous Melanoma	Primary	Not Applicable	NA	IMPACTv5-CLIN-20160295R	79.3	0	2014	Skin, scalp	1	Yes	0	NF1	1	Pembrolizumab	PD-1 Mono	0	0	43.2329	43.2329	81	0	169	0.686992	0	6.77778	1	1	0	0	0	0	0	M0	M0
P-0013679-T01-IM5	Female	Cutaneous Melanoma	Metastasis	Lymph node, Regional	LR / In-Transit / Regional LN	IMPACTv5-CLIN-20160296R	71.4	0	4349	Skin, leg/hip	4	Unknown	0	NRAS_Q61	1	Nivolumab	PD-1 Mono	1	0	3.94521	37.5123	80	0	Unknown	Unknown	Unknown	Unknown	Unknown	Unknown	Unknown	0	0	0	0	M0	M0
P-0013765-T01-IM5	Male	Cutaneous Melanoma	Primary	Not Applicable	NA	IMPACTv5-CLIN-20160303	63.2	0	1622	Skin, trunk	2	Yes	0	BRAF_CLASS_1_V600E	1	Ipilimumab, Nivolumab	PD-1 Combo	0	0	45.7315	45.7315	64	0	181	0.735772	0	4.625	0	9	9	1	1	0	1	M1c	M1d
P-0013910-T01-IM5	Female	Cutaneous Melanoma	Metastasis	Lymph node, Regional	LR / In-Transit / Regional LN	IMPACTv5-CLIN-20160318	47.4	0	1864	Skin, external ear	1	No	0	NRAS_Q61	0	#N/A	#N/A	#N/A	#N/A	#N/A	#N/A	#N/A	#N/A	#N/A	#N/A	#N/A	#N/A	#N/A	#N/A	#N/A	#N/A	#N/A	#N/A	#N/A	#N/A	#N/A
P-0014047-T03-IM6	Female	Cutaneous Melanoma	Metastasis	Small Intestine	Other Visceral	IMPACTv6-CLIN-20160405	67.5	0	1533	Skin, arm/shoulder	3	Yes	0	NRAS_Q61	0	#N/A	#N/A	#N/A	#N/A	#N/A	#N/A	#N/A	#N/A	#N/A	#N/A	#N/A	#N/A	#N/A	#N/A	#N/A	#N/A	#N/A	#N/A	#N/A	#N/A	#N/A
P-0014137-T01-IM5	Male	Cutaneous Melanoma	Primary	Not Applicable	NA	IMPACTv5-CLIN-20160328	77.5	0	835	Skin, foot	4	Yes	0	NRAS_Q61	1	Pembrolizumab	PD-1 Mono	1	0	8.44932	22.126	78	1	Unknown	Unknown	Unknown	1.625	0	1	1	0	0	0	0	M0	M0
P-0014148-T01-IM5	Female	Cutaneous Melanoma	Metastasis	Lymph node, Non-Regional	Soft Tissue / Distant LN	IMPACTv5-CLIN-20160331	28.5	0	6200	Skin, trunk	2	Unknown	0	BRAF_CLASS_1_V600E	0	#N/A	#N/A	#N/A	#N/A	#N/A	#N/A	#N/A	#N/A	#N/A	#N/A	#N/A	#N/A	#N/A	#N/A	#N/A	#N/A	#N/A	#N/A	#N/A	#N/A	#N/A
P-0014159-T01-IM5	Male	Melanoma of Unknown Primary	Metastasis	Soft Tissue	Soft Tissue / Distant LN	IMPACTv5-CLIN-20160329	60.6	1	135	Unknown Primary	8	NA	0	BRAF_CLASS_1_V600E	0	#N/A	#N/A	#N/A	#N/A	#N/A	#N/A	#N/A	#N/A	#N/A	#N/A	#N/A	#N/A	#N/A	#N/A	#N/A	#N/A	#N/A	#N/A	#N/A	#N/A	#N/A
P-0014206-T01-IM6	Male	Cutaneous Melanoma	Metastasis	Soft Tissue	Soft Tissue / Distant LN	IMPACTv6-CLIN-20160334	54.6	0	1607	Skin, trunk	2	No	0	NRAS_Q61	1	Ipilimumab, Nivolumab	PD-1 Combo	1	0	3.64932	41.6548	55	1	287	1.16667	1	5.21739	1	9	9	1	1	0	0	M1c	M1d
P-0014208-T01-IM6	Female	Cutaneous Melanoma	Metastasis	In-transit	LR / In-Transit / Regional LN	IMPACTv6-CLIN-20160334	34.5	0	4245	Skin, arm/shoulder	3	Unknown	0	RAS_OTHER	0	#N/A	#N/A	#N/A	#N/A	#N/A	#N/A	#N/A	#N/A	#N/A	#N/A	#N/A	#N/A	#N/A	#N/A	#N/A	#N/A	#N/A	#N/A	#N/A	#N/A	#N/A
P-0014227-T01-IM6	Female	Cutaneous Melanoma	Primary	Not Applicable	NA	IMPACTv6-CLIN-20160335	57.9	0	188	Skin, arm/shoulder	3	Yes	0	NF1	0	#N/A	#N/A	#N/A	#N/A	#N/A	#N/A	#N/A	#N/A	#N/A	#N/A	#N/A	#N/A	#N/A	#N/A	#N/A	#N/A	#N/A	#N/A	#N/A	#N/A	#N/A
P-0014229-T01-IM6	Female	Cutaneous Melanoma	Metastasis	Soft Tissue	Soft Tissue / Distant LN	IMPACTv6-CLIN-20160335	37.7	0	3976	Skin, arm/shoulder	3	No	0	NRAS_Q61	1	Pembrolizumab	PD-1 Mono	0	0	45.4027	45.4027	45	1	211	0.857724	0	2.78571	0	1	1	1	0	0	0	M1b	M1b
P-0014242-T01-IM6	Male	Melanoma of Unknown Primary	Metastasis	Soft Tissue	Soft Tissue / Distant LN	IMPACTv6-CLIN-20160336	59.6	0	1645	Unknown Primary	8	NA	0	RAS_OTHER	1	Ipilimumab, Nivolumab	PD-1 Combo	1	0	2.79452	45.1397	60	0	186	0.756098	0	2.23529	0	9	9	0	1	0	0	M1c	M1d
P-0014311-T01-IM6	Female	Melanoma of Unknown Primary	Metastasis	Soft Tissue	Soft Tissue / Distant LN	IMPACTv6-CLIN-20160342	58.7	0	958	Unknown Primary	8	NA	0	Other_Driver	0	#N/A	#N/A	#N/A	#N/A	#N/A	#N/A	#N/A	#N/A	#N/A	#N/A	#N/A	#N/A	#N/A	#N/A	#N/A	#N/A	#N/A	#N/A	#N/A	#N/A	#N/A
P-0014379-T01-IM6	Male	Melanoma of Unknown Primary	Metastasis	Lung	Lung	IMPACTv6-CLIN-20160347	47.9	0	1420	Unknown Primary	8	NA	0	BRAF_CLASS_1_V600E	1	Pembrolizumab	PD-1 Mono	1	0	5.52329	44.5808	48	0	160	0.650407	0	2.27778	0	1	1	1	0	0	0	M1b	M1b
P-0014392-T01-IM6	Male	Cutaneous Melanoma	Primary	Not Applicable	NA	IMPACTv6-CLIN-20160345	61.4	1	169	Skin, arm/shoulder	3	No	0	NF1	0	#N/A	#N/A	#N/A	#N/A	#N/A	#N/A	#N/A	#N/A	#N/A	#N/A	#N/A	#N/A	#N/A	#N/A	#N/A	#N/A	#N/A	#N/A	#N/A	#N/A	#N/A
P-0014449-T01-IM6	Male	Melanoma of Unknown Primary	Metastasis	Soft Tissue	Soft Tissue / Distant LN	IMPACTv6-CLIN-20160350	66.7	1	436	Unknown Primary	8	NA	0	Unknown_Driver	1	Ipilimumab, Nivolumab	PD-1 Combo	1	1	2.03836	10.9808	67	0	273	1.10976	1	3.93333	0	9	9	0	1	0	1	M1c	M1d
P-0014556-T01-IM6	Male	Cutaneous Melanoma	Metastasis	In-transit	LR / In-Transit / Regional LN		82.9	1	350	Skin, trunk	2	Yes	0	NRAS_Q61	1	Pembrolizumab	PD-1 Mono	1	1	2.89315	5.3589	84	1	151	0.613821	0	0.504132	0	0	1	0	0	0	0	M0	M0
P-0014682-T01-IM6	Male	Cutaneous Melanoma	Metastasis	Lymph Node, Regional	LR / In-Transit / Regional LN	IMPACTv6-CLIN-20160359R2	81.4	1	1764	Skin, trunk	2	Yes	0	NRAS_Q61	1	Pembrolizumab	PD-1 Mono	1	1	17.8521	35.211	83	0	248	1.00813	1	3.93333	0	1	1	0	0	0	0	M1c	M0
P-0014910-T01-IM6	Male	Melanoma of Unknown Primary	Metastasis	Soft Tissue	Soft Tissue / Distant LN	IMPACTv6-CLIN-20160380	71.3	0	1425	Unknown Primary	8	NA	0	NRAS_Q61	1	Pembrolizumab	PD-1 Mono	0	0	45.7973	45.7973	71	0	647	2.63008	1	5.875	1	1	0	1	0	0	0	M1c	M1b
P-0014946-T01-IM6	Male	Cutaneous Melanoma	Metastasis	Lymph Node, Regional	LR / In-Transit / Regional LN	IMPACTv6-CLIN-20160381	73.1	0	1547	Skin, face	1	Yes	0	KIT_PDGFRA	1	Ipilimumab, Nivolumab	PD-1 Combo	0	0	29.589	29.589	75	1	193	0.784553	0	4.42857	0	9	9	0	0	1	1	M1c	M1c
P-0014966-T01-IM6	Male	Cutaneous Melanoma	Metastasis	Pleura	Lung	IMPACTv6-CLIN-20160384	60.6	0	3422	Skin, neck	1	No	0	BRAF_CLASS_1_V600E	1	Pembrolizumab	PD-1 Mono	1	0	41.063	45.4027	66	1	255	1.03659	1	3.61905	0	0	1	1	0	0	0	M1c	M1b
P-0014969-T01-IM6	Male	Melanoma of Unknown Primary	Metastasis	Lymph Node, Regional	LR / In-Transit / Regional LN	IMPACTv6-CLIN-20160384	42.6	0	952	Unknown Primary	8	NA	0	BRAF_CLASS_2_3	0	#N/A	#N/A	#N/A	#N/A	#N/A	#N/A	#N/A	#N/A	#N/A	#N/A	#N/A	#N/A	#N/A	#N/A	#N/A	#N/A	#N/A	#N/A	#N/A	#N/A	#N/A
P-0015010-T01-IM6	Male	Cutaneous Melanoma	Primary	Not Applicable	NA	IMPACTv6-CLIN-20160388	83.3	1	1399	Skin, leg/hip	4	No	0	Other_Driver	1	Pembrolizumab	PD-1 Mono	1	1	11.9342	36.263	84	1	208	0.845528	0	2.18182	0	1	1	0	0	0	0	M0	M0
P-0015106-T01-IM6	Male	Cutaneous Melanoma	Primary	Not Applicable	NA	IMPACTv6-CLIN-20160392	48.3	1	791	Skin, leg/hip	4	Yes	0	BRAF_CLASS_1_Other	0	#N/A	#N/A	#N/A	#N/A	#N/A	#N/A	#N/A	#N/A	#N/A	#N/A	#N/A	#N/A	#N/A	#N/A	#N/A	#N/A	#N/A	#N/A	#N/A	#N/A	#N/A
P-0015122-T01-IM6	Female	Cutaneous Melanoma	Primary	Not Applicable	NA	IMPACTv6-CLIN-20160395	74.3	0	645	Skin, trunk	2	No	0	BRAF_CLASS_2_3	1	Pembrolizumab	PD-1 Mono	0	0	20.1534	20.1534	74	2	387	1.57317	1	2.29167	0	0	1	1	0	0	0	M1c	M1b
P-0015142-T01-IM6	Male	Cutaneous Melanoma	Primary	Not Applicable	NA	IMPACTv6-CLIN-20160397	77.6	0	1189	Skin, trunk	2	No	0	BRAF_CLASS_2_3	0	#N/A	#N/A	#N/A	#N/A	#N/A	#N/A	#N/A	#N/A	#N/A	#N/A	#N/A	#N/A	#N/A	#N/A	#N/A	#N/A	#N/A	#N/A	#N/A	#N/A	#N/A
P-0015257-T01-IM6	Female	Cutaneous Melanoma	Primary	Not Applicable	NA	IMPACTv6-CLIN-20160406	64.9	0	2259	Skin, scalp	1	No	0	NF1	1	Pembrolizumab	PD-1 Mono	0	0	43.1014	43.1014	67	0	194	0.788618	0	3	0	1	1	1	0	0	1	M1c	M1c
P-0015281-T01-IM6	Male	Cutaneous Melanoma	Metastasis	Liver	Liver	IMPACTv6-CLIN-20160403R	54.5	0	2632	Skin, trunk	2	No	0	NF1	1	Pembrolizumab	PD-1 Mono	1	0	7.95616	12.0658	61	0	Unknown	Unknown	Unknown	Unknown	Unknown	Unknown	Unknown	0	0	0	1	M1c	M1c
P-0015373-T01-IM6	Male	Cutaneous Melanoma	Primary	Not Applicable	NA	IMPACTv6-CLIN-20160411	33.1	1	740	Skin, face	1	No	0	BRAF_CLASS_1_V600E	1	Ipilimumab, Nivolumab	PD-1 Combo	1	1	4.27397	17.8192	34	0	162	0.658537	0	2.46667	0	9	9	0	0	0	0	M0	M0
P-0015386-T01-IM6	Male	Cutaneous Melanoma	Metastasis	Brain	Brain	IMPACTv6-CLIN-20160413	53.2	0	3802	Skin, arm/shoulder	3	No	0	NF1	0	#N/A	#N/A	#N/A	#N/A	#N/A	#N/A	#N/A	#N/A	#N/A	#N/A	#N/A	#N/A	#N/A	#N/A	#N/A	#N/A	#N/A	#N/A	#N/A	#N/A	#N/A
P-0015407-T01-IM6	Male	Cutaneous Melanoma	Metastasis	Lung	Lung	IMPACTv6-CLIN-20160412	62.9	1	1942	Skin, scalp	1	No	0	BRAF_CLASS_2_3	1	Ipilimumab, Nivolumab	PD-1 Combo	1	1	15.6164	40.4055	65	0	150	0.609756	0	5.8	1	9	9	1	0	1	0	M1c	M1c
P-0015415-T01-IM6	Male	Melanoma of Unknown Primary	Metastasis	Brain	Brain	IMPACTv6-CLIN-20160407	65.2	1	188	Unknown Primary	8	NA	0	RAS_OTHER	1	Ipilimumab, Nivolumab	PD-1 Combo	1	1	3.48493	4.96438	65	1	255	1.03659	1	9.25	1	9	9	1	1	0	0	M1c	M1d
P-0015438-T01-IM6	Male	Melanoma of Unknown Primary	Metastasis	Liver	Liver	IMPACTv6-CLIN-20160416	71.8	0	1361	Unknown Primary	8	NA	0	NF1	1	Ipilimumab, Nivolumab	PD-1 Combo	0	0	43.4959	43.4959	72	1	159	0.646341	0	10.6	1	9	9	1	0	1	1	M1c	M1c
P-0015462-T01-IM6	Male	Cutaneous Melanoma	Metastasis	Lymph Node, Regional	LR / In-Transit / Regional LN	IMPACTv6-CLIN-20160415	55.9	1	5671	Skin, leg/hip	4	No	0	BRAF_CLASS_1_V600E	0	#N/A	#N/A	#N/A	#N/A	#N/A	#N/A	#N/A	#N/A	#N/A	#N/A	#N/A	#N/A	#N/A	#N/A	#N/A	#N/A	#N/A	#N/A	#N/A	#N/A	#N/A
P-0015471-T01-IM6	Male	Cutaneous Melanoma	Metastasis	Lymph Node, Regional	LR / In-Transit / Regional LN	IMPACTv6-CLIN-20160417	62	0	4005	Skin, leg/hip	4	Yes	0	Unknown_Driver	1	Pembrolizumab	PD-1 Mono	1	0	17.2603	40.8329	70	0	183	0.743902	0	5.25	1	1	0	0	0	0	0	M0	M0
P-0015498-T01-IM6	Male	Cutaneous Melanoma	Metastasis	Soft Tissue	Soft Tissue / Distant LN		25.8	0	1361	Skin, trunk	2	Unknown	0	NRAS_Q61	1	Ipilimumab, Nivolumab	PD-1 Combo	1	0	3.12329	40.4055	26	1	563	2.28862	1	7.2	1	9	9	0	0	0	0	M1c	M0
P-0015511-T01-IM6	Male	Melanoma of Unknown Primary	Metastasis	Brain	Brain	IMPACTv6-CLIN-20160418	31.8	0	1334	Unknown Primary	8	NA	0	BRAF_CLASS_1_V600E	1	Ipilimumab, Nivolumab	PD-1 Combo	1	0	1.34795	42.7068	32	1	265	1.07724	1	4.6	0	9	9	1	1	0	0	M1c	M1d
P-0015512-T01-IM6	Male	Cutaneous Melanoma	Primary	Not Applicable	NA	IMPACTv6-CLIN-20160418	84.6	0	1205	Skin, neck	1	Yes	0	NF1	1	Pembrolizumab	PD-1 Mono	0	0	38.0055	38.0055	85	1	211	0.857724	0	5.2	1	0	0	1	0	0	0	M1b	M1b
P-0015513-T01-IM6	Male	Melanoma of Unknown Primary	Metastasis	Bone	Bone	IMPACTv6-CLIN-20160418	67	0	903	Unknown Primary	8	NA	0	BRAF_CLASS_1_V600E	0	#N/A	#N/A	#N/A	#N/A	#N/A	#N/A	#N/A	#N/A	#N/A	#N/A	#N/A	#N/A	#N/A	#N/A	#N/A	#N/A	#N/A	#N/A	#N/A	#N/A	#N/A
P-0015521-T01-IM6	Male	Cutaneous Melanoma	Metastasis	Lymph Node, Regional	LR / In-Transit / Regional LN	IMPACTv6-CLIN-20160420	49.4	0	2745	Skin, eyelid	1	Yes	0	NRAS_Q61	1	Pembrolizumab	PD-1 Mono	1	0	14.6301	41.8192	53	0	178	0.723577	0	2.75	0	1	1	1	0	0	0	M1b	M1b
P-0015526-T01-IM6	Male	Melanoma of Unknown Primary	Metastasis	Lymph Node, Regional	LR / In-Transit / Regional LN	IMPACTv6-CLIN-20160420	47.2	0	880	Unknown Primary	8	NA	0	NF1	0	#N/A	#N/A	#N/A	#N/A	#N/A	#N/A	#N/A	#N/A	#N/A	#N/A	#N/A	#N/A	#N/A	#N/A	#N/A	#N/A	#N/A	#N/A	#N/A	#N/A	#N/A
P-0015612-T01-IM6	Female	Cutaneous Melanoma	Metastasis	Liver	Liver	IMPACTv6-CLIN-20160426	60.9	0	2988	Skin, arm/shoulder	3	No	0	Unknown_Driver	1	Ipilimumab, Nivolumab	PD-1 Combo	0	0	39.0575	39.0575	66	1	300	1.21951	1	2.22222	0	9	9	0	0	1	1	M1c	M1c
P-0015679-T01-IM6	Male	Cutaneous Melanoma	Metastasis	Liver	Liver	IMPACTv6-CLIN-20160432	42.2	0	2240	Skin, trunk	2	Yes	0	BRAF_CLASS_1_Other	0	#N/A	#N/A	#N/A	#N/A	#N/A	#N/A	#N/A	#N/A	#N/A	#N/A	#N/A	#N/A	#N/A	#N/A	#N/A	#N/A	#N/A	#N/A	#N/A	#N/A	#N/A
P-0015694-T01-IM6	Female	Melanoma of Unknown Primary	Metastasis	Lymph Node, Regional	LR / In-Transit / Regional LN	IMPACTv6-CLIN-20160433	64.8	1	345	Unknown Primary	8	NA	0	NRAS_Q61	1	Pembrolizumab	PD-1 Mono	1	1	0.558904	7.43014	65	1	189	0.768293	0	23.75	1	0	0	0	0	0	0	M0	M0
P-0015697-T01-IM6	Female	Cutaneous Melanoma	Metastasis	Lung	Lung	IMPACTv6-CLIN-20160433	64	0	3051	Skin, external ear	1	No	0	NRAS_Q61	1	Pembrolizumab	PD-1 Mono	0	0	43.0356	43.0356	69	0	245	0.995935	0	3.33333	0	1	1	1	0	0	0	M1b	M1b
P-0015718-T01-IM6	Female	Melanoma of Unknown Primary	Metastasis	Lymph Node, Regional	LR / In-Transit / Regional LN	IMPACTv6-CLIN-20160428	53.4	0	974	Unknown Primary	8	NA	0	NF1	0	#N/A	#N/A	#N/A	#N/A	#N/A	#N/A	#N/A	#N/A	#N/A	#N/A	#N/A	#N/A	#N/A	#N/A	#N/A	#N/A	#N/A	#N/A	#N/A	#N/A	#N/A
P-0015827-T01-IM6	Female	Cutaneous Melanoma	Primary	Not Applicable	NA	IMPACTv6-CLIN-20160439	90.8	0	1341	Skin, leg/hip	4	No	0	KIT_PDGFRA	1	Pembrolizumab	PD-1 Mono	0	0	39.4192	39.4192	91	0	218	0.886179	0	0.581197	0	0	1	0	0	0	0	M0	M0
P-0015830-T01-IM6	Male	Cutaneous Melanoma	Metastasis	Lymph Node, Regional	LR / In-Transit / Regional LN	IMPACTv6-CLIN-20160439	81.8	0	1329	Skin, scalp	1	No	0	Other_Driver	1	Pembrolizumab	PD-1 Mono	0	0	42.3452	42.3452	82	1	153	0.621951	0	5.66667	1	1	0	0	0	0	0	M0	M0
P-0015832-T01-IM6	Male	Melanoma of Unknown Primary	Metastasis	Lymph Node, Regional	LR / In-Transit / Regional LN		72.5	1	121	Unknown Primary	8	NA	0	NF1	1	Ipilimumab, Nivolumab	PD-1 Combo	1	1	1.8411	1.8411	74	1	226	0.918699	0	13.5455	1	9	9	0	0	0	0	M0	M0
P-0015855-T01-IM6	Male	Cutaneous Melanoma	Metastasis	In-transit	LR / In-Transit / Regional LN	IMPACTv6-CLIN-20160440	51.7	0	1322	Skin, arm/shoulder	3	No	0	NRAS_Q61	0	#N/A	#N/A	#N/A	#N/A	#N/A	#N/A	#N/A	#N/A	#N/A	#N/A	#N/A	#N/A	#N/A	#N/A	#N/A	#N/A	#N/A	#N/A	#N/A	#N/A	#N/A
P-0015881-T03-IM6	Male	Cutaneous Melanoma	Primary	Not Applicable	NA	IMPACTv6-CLIN-20170119R	65.4	0	1174	Skin, scalp	1	Yes	0	NF1	1	Ipilimumab, Nivolumab	PD-1 Combo	0	0	33.5014	33.5014	66	0	153	0.621951	0	4.4	0	9	9	1	0	1	0	M1c	M1c
P-0015882-T01-IM6	Female	Cutaneous Melanoma	Metastasis	Lymph Node, Regional	LR / In-Transit / Regional LN	IMPACTv6-CLIN-20160445	67.8	1	1059	Skin, trunk	2	Unknown	0	NF1	1	Pembrolizumab	PD-1 Mono	1	1	5.29315	7.43014	70	1	227	0.922764	0	7.16667	1	1	0	0	0	1	1	M1c	M1c
P-0015895-T01-IM6	Male	Melanoma of Unknown Primary	Metastasis	Lymph Node, Regional	LR / In-Transit / Regional LN	IMPACTv6-CLIN-20160445	63.4	1	180	Unknown Primary	8	NA	0	BRAF_CLASS_1_V600E	0	#N/A	#N/A	#N/A	#N/A	#N/A	#N/A	#N/A	#N/A	#N/A	#N/A	#N/A	#N/A	#N/A	#N/A	#N/A	#N/A	#N/A	#N/A	#N/A	#N/A	#N/A
P-0015917-T01-IM6	Male	Cutaneous Melanoma	Primary	Not Applicable	NA	IMPACTv6-CLIN-20160446	73.5	0	1023	Skin, arm/shoulder	3	Yes	0	NRAS_Q61	0	#N/A	#N/A	#N/A	#N/A	#N/A	#N/A	#N/A	#N/A	#N/A	#N/A	#N/A	#N/A	#N/A	#N/A	#N/A	#N/A	#N/A	#N/A	#N/A	#N/A	#N/A
P-0015959-T01-IM6	Male	Cutaneous Melanoma	Metastasis	In-transit	LR / In-Transit / Regional LN	IMPACTv6-CLIN-20160449	61.1	1	1882	Skin, trunk	2	Unknown	0	NRAS_Q61	0	#N/A	#N/A	#N/A	#N/A	#N/A	#N/A	#N/A	#N/A	#N/A	#N/A	#N/A	#N/A	#N/A	#N/A	#N/A	#N/A	#N/A	#N/A	#N/A	#N/A	#N/A
P-0016018-T01-IM6	Male	Cutaneous Melanoma	Metastasis	Soft Tissue	Soft Tissue / Distant LN	IMPACTv6-CLIN-20160453	54.8	1	1016	Skin, trunk	2	Yes	0	Unknown_Driver	1	Pembrolizumab	PD-1 Mono	1	1	1.15068	3.84658	57	0	222	0.902439	0	5.71429	1	0	0	1	0	1	0	M1c	M1c
P-0016027-T01-IM6	Male	Cutaneous Melanoma	Metastasis	Lung	Lung	IMPACTv6-CLIN-20160453	71.9	0	1445	Skin, arm/shoulder	3	No	0	NF1	0	#N/A	#N/A	#N/A	#N/A	#N/A	#N/A	#N/A	#N/A	#N/A	#N/A	#N/A	#N/A	#N/A	#N/A	#N/A	#N/A	#N/A	#N/A	#N/A	#N/A	#N/A
P-0016177-T01-IM6	Male	Cutaneous Melanoma	Metastasis	In-transit	LR / In-Transit / Regional LN	IMPACTv6-CLIN-20160460	60.5	1	4958	Skin, arm/shoulder	3	Unknown	0	BRAF_CLASS_1_V600E	1	Pembrolizumab	PD-1 Mono	1	1	1.93973	16.0767	73	1	177	0.719512	0	5	1	0	0	0	0	0	0	M0	M0
P-0016197-T01-IM6	Male	Cutaneous Melanoma	Metastasis	Brain	Brain	IMPACTv6-CLIN-20160462	81.8	1	496	Skin, arm/shoulder	3	Yes	0	NRAS_Q61	1	Pembrolizumab	PD-1 Mono	1	1	1.64384	3.15616	83	2	297	1.20732	1	25.8571	1	0	0	1	1	0	0	M1c	M1d
P-0016282-T01-IM6	Male	Melanoma of Unknown Primary	Metastasis	Lung	Lung	IMPACTv6-CLIN-20160467	73.1	0	653	Unknown Primary	8	NA	0	NF1	1	Ipilimumab, Nivolumab	PD-1 Combo	0	0	20.1863	20.1863	73	0	159	0.636	0	2.9375	0	9	9	1	0	0	0	M1b	M1b
P-0016327-T01-IM6	Male	Melanoma of Unknown Primary	Metastasis	Lymph Node, Regional	LR / In-Transit / Regional LN	IMPACTv6-CLIN-20160475	56.1	0	717	Unknown Primary	8	NA	0	NRAS_Q61	0	#N/A	#N/A	#N/A	#N/A	#N/A	#N/A	#N/A	#N/A	#N/A	#N/A	#N/A	#N/A	#N/A	#N/A	#N/A	#N/A	#N/A	#N/A	#N/A	#N/A	#N/A
P-0016328-T01-IM6	Male	Cutaneous Melanoma	Metastasis	In-transit	LR / In-Transit / Regional LN	IMPACTv6-CLIN-20160475	45.3	1	2008	Skin, trunk	2	Unknown	0	NRAS_Q61	1	Ipilimumab, Nivolumab	PD-1 Combo	1	1	5.7863	13.5123	50	2	Unknown	Unknown	Unknown	16.3846	1	9	9	0	1	1	0	M1c	M1d
P-0016347-T01-IM6	Male	Cutaneous Melanoma	Metastasis	In-transit	LR / In-Transit / Regional LN	IMPACTv6-CLIN-20160476	64	0	1343	Skin, leg/hip	4	No	1	Other_Driver	1	Nivolumab	PD-1 Mono	1	0	2.43288	11.4411	67	0	Unknown	Unknown	Unknown	Unknown	Unknown	Unknown	Unknown	0	0	0	0	M0	M0
P-0016506-T01-IM6	Female	Cutaneous Melanoma	Metastasis	In-transit	LR / In-Transit / Regional LN	IMPACTv6-CLIN-20160488	44.7	0	1433	Skin, external ear	1	No	0	NRAS_Q61	1	Pembrolizumab	PD-1 Mono	1	0	3.58356	41.1945	45	0	153	0.621951	0	1	0	1	1	0	0	0	0	M0	M0
P-0016530-T01-IM6	Male	Cutaneous Melanoma	Primary	Not Applicable	NA	IMPACTv6-CLIN-20160487	78.3	0	911	Skin, trunk	2	Yes	0	Other_Driver	1	Nivolumab	PD-1 Mono	0	0	15.6164	15.6164	80	1	172	0.688	0	1.66667	0	1	1	1	0	0	0	M1b	M1b
P-0016533-T01-IM6	Male	Cutaneous Melanoma	Metastasis	Pleura	Lung	IMPACTv6-CLIN-20160487	51	0	1595	Skin, trunk	2	No	0	BRAF_CLASS_1_V600E	0	#N/A	#N/A	#N/A	#N/A	#N/A	#N/A	#N/A	#N/A	#N/A	#N/A	#N/A	#N/A	#N/A	#N/A	#N/A	#N/A	#N/A	#N/A	#N/A	#N/A	#N/A
P-0016596-T01-IM6	Female	Cutaneous Melanoma	Primary	Not Applicable	NA	IMPACTv6-CLIN-20160490	56	0	56	Skin, leg/hip	4	No	0	NRAS_Q61	0	#N/A	#N/A	#N/A	#N/A	#N/A	#N/A	#N/A	#N/A	#N/A	#N/A	#N/A	#N/A	#N/A	#N/A	#N/A	#N/A	#N/A	#N/A	#N/A	#N/A	#N/A
P-0016799-T01-IM6	Female	Cutaneous Melanoma	Metastasis	Brain	Brain	IMPACTv6-CLIN-20170001	56.2	0	1251	Skin, face	1	Yes	0	BRAF_CLASS_1_V600E	0	#N/A	#N/A	#N/A	#N/A	#N/A	#N/A	#N/A	#N/A	#N/A	#N/A	#N/A	#N/A	#N/A	#N/A	#N/A	#N/A	#N/A	#N/A	#N/A	#N/A	#N/A
P-0016800-T01-IM6	Male	Cutaneous Melanoma	Metastasis	Soft Tissue	Soft Tissue / Distant LN	IMPACTv6-CLIN-20170001	34.8	1	6481	Skin, hand	3	Unknown	0	NRAS_Q61	0	#N/A	#N/A	#N/A	#N/A	#N/A	#N/A	#N/A	#N/A	#N/A	#N/A	#N/A	#N/A	#N/A	#N/A	#N/A	#N/A	#N/A	#N/A	#N/A	#N/A	#N/A
P-0016853-T02-IM6	Female	Cutaneous Melanoma	Metastasis	Lymph Node, Regional	LR / In-Transit / Regional LN	IMPACTv6-CLIN-20180014	49.9	0	1379	Skin, leg/hip	4	No	0	NRAS_Q61	1	Pembrolizumab	PD-1 Mono	0	0	28.7671	28.7671	51	0	Unknown	Unknown	Unknown	2.19048	0	1	1	0	0	0	0	M0	M0
P-0016928-T01-IM6	Male	Cutaneous Melanoma	Metastasis	Lung	Lung	IMPACTv6-CLIN-20170011	70.3	0	1037	Skin, face	1	No	0	BRAF_CLASS_1_Other	0	#N/A	#N/A	#N/A	#N/A	#N/A	#N/A	#N/A	#N/A	#N/A	#N/A	#N/A	#N/A	#N/A	#N/A	#N/A	#N/A	#N/A	#N/A	#N/A	#N/A	#N/A
P-0016935-T01-IM6	Female	Cutaneous Melanoma	Metastasis	Lung	Lung	IMPACTv6-CLIN-20170011	55.5	0	2190	Skin, face	1	No	0	Other_Driver	0	#N/A	#N/A	#N/A	#N/A	#N/A	#N/A	#N/A	#N/A	#N/A	#N/A	#N/A	#N/A	#N/A	#N/A	#N/A	#N/A	#N/A	#N/A	#N/A	#N/A	#N/A
P-0017003-T01-IM6	Female	Cutaneous Melanoma	Primary	Not Applicable	NA	IMPACTv6-CLIN-20170016	42.7	0	820	Skin, leg/hip	4	Yes	0	BRAF_CLASS_1_V600E	1	Ipilimumab, Nivolumab	PD-1 Combo	0	0	25.8082	25.8082	43	1	212	0.861789	0	7	1	9	9	0	0	0	0	M0	M0
P-0017047-T01-IM6	Male	Melanoma of Unknown Primary	Metastasis	Liver	Liver	IMPACTv6-CLIN-20170019	76.6	0	27	Unknown Primary	8	NA	0	BRAF_CLASS_1_Other	0	#N/A	#N/A	#N/A	#N/A	#N/A	#N/A	#N/A	#N/A	#N/A	#N/A	#N/A	#N/A	#N/A	#N/A	#N/A	#N/A	#N/A	#N/A	#N/A	#N/A	#N/A
P-0017054-T01-IM6	Male	Cutaneous Melanoma	Metastasis	Lymph Node, Regional	LR / In-Transit / Regional LN	IMPACTv6-CLIN-20170019	49.6	1	993	Skin, trunk	2	No	0	BRAF_CLASS_1_V600E	1	Ipilimumab, Nivolumab	PD-1 Combo	1	1	2.07123	20.2849	51	0	168	0.672	0	2.15789	0	9	9	1	0	0	0	M1b	M1b
P-0017176-T01-IM6	Male	Cutaneous Melanoma	Metastasis	Lung	Lung	IMPACTv6-CLIN-20170028	64	0	1544	Skin, trunk	2	Yes	0	Other_Driver	1	Pembrolizumab	PD-1 Mono	0	0	38.663	38.663	65	0	126	0.504	0	1.92857	0	1	1	1	0	0	0	M1b	M1b
P-0017215-T01-IM5	Male	Cutaneous Melanoma	Metastasis	Soft Tissue	Soft Tissue / Distant LN	IMPACTv5-CLIN-20170050	61.1	1	2801	Skin, trunk	2	No	0	NF1	1	Ipilimumab, Nivolumab	PD-1 Combo	1	1	2.13699	2.13699	69	2	415	1.68699	1	2.21875	0	9	9	1	1	0	1	M1c	M1d
P-0017272-T01-IM6	Female	Cutaneous Melanoma	Metastasis	Lung	Lung	IMPACTv6-CLIN-20170036	32.3	0	1421	Skin, trunk	2	No	0	BRAF_CLASS_1_V600E	1	Pembrolizumab	PD-1 Mono	0	0	39.0247	39.0247	33	0	Unknown	Unknown	Unknown	2.30769	0	0	1	1	0	0	0	M1b	M1b
P-0017353-T01-IM6	Female	Cutaneous Melanoma	Primary	Not Applicable	NA	IMPACTv6-CLIN-20170035	32.8	1	1084	Skin, leg/hip	4	Yes	0	BRAF_CLASS_1_V600E	0	#N/A	#N/A	#N/A	#N/A	#N/A	#N/A	#N/A	#N/A	#N/A	#N/A	#N/A	#N/A	#N/A	#N/A	#N/A	#N/A	#N/A	#N/A	#N/A	#N/A	#N/A
P-0017361-T01-IM6	Male	Melanoma of Unknown Primary	Metastasis	Lymph Node, Regional	LR / In-Transit / Regional LN	IMPACTv6-CLIN-20170035	27	0	838	Unknown Primary	8	NA	0	NRAS_Q61	0	#N/A	#N/A	#N/A	#N/A	#N/A	#N/A	#N/A	#N/A	#N/A	#N/A	#N/A	#N/A	#N/A	#N/A	#N/A	#N/A	#N/A	#N/A	#N/A	#N/A	#N/A
P-0017384-T01-IM6	Female	Cutaneous Melanoma	Primary	Not Applicable	NA	IMPACTv6-CLIN-20170038	61.2	1	2359	Skin, hand	3	No	0	BRAF_CLASS_2_3	1	Ipilimumab, Nivolumab	PD-1 Combo	1	1	5.06301	12.8548	67	1	406	1.624	1	5.27273	1	9	9	1	0	1	0	M1c	M1c
P-0017461-T01-IM6	Male	Cutaneous Melanoma	Metastasis	Lung	Lung	IMPACTv6-CLIN-20170042	48.7	1	2422	Skin, trunk	2	Unknown	0	BRAF_CLASS_1_V600E	1	Pembrolizumab	PD-1 Mono	1	1	5.88493	13.7753	54	0	Unknown	Unknown	Unknown	2.8125	0	1	1	1	0	0	0	M1b	M1b
P-0017506-T01-IM6	Male	Cutaneous Melanoma	Metastasis	Lung	Lung	IMPACTv6-CLIN-20170045	75.1	1	2220	Skin, neck	1	Unknown	0	NF1	1	Pembrolizumab	PD-1 Mono	1	1	9.33699	16.6027	80	1	Unknown	Unknown	Unknown	2.88235	0	1	1	1	0	0	0	M1b	M1b
P-0017512-T01-IM6	Male	Cutaneous Melanoma	Metastasis	In-transit	LR / In-Transit / Regional LN	IMPACTv6-CLIN-20170045	63.4	0	2620	Skin, leg/hip	4	No	0	BRAF_CLASS_1_V600E	1	Ipilimumab, Nivolumab	PD-1 Combo	0	0	28.5041	28.5041	68	0	273	1.092	1	1.82353	0	9	9	0	0	0	0	M1c	M1a
P-0017539-T01-IM5	Male	Cutaneous Melanoma	Metastasis	Brain	Brain	IMPACTv5-CLIN-20170049	36.5	0	3264	Skin, trunk	2	Unknown	0	BRAF_CLASS_1_V600E	1	Nivolumab	PD-1 Mono	1	0	1.70959	12.9863	44	2	Unknown	Unknown	Unknown	4.53333	0	0	0	1	1	0	0	M1c	M1d
P-0017635-T01-IM5	Male	Cutaneous Melanoma	Metastasis	Lymph Node, Regional	LR / In-Transit / Regional LN	IMPACTv5-CLIN-20170051	62.7	0	921	Skin, leg/hip	4	No	0	BRAF_CLASS_1_Other	0	#N/A	#N/A	#N/A	#N/A	#N/A	#N/A	#N/A	#N/A	#N/A	#N/A	#N/A	#N/A	#N/A	#N/A	#N/A	#N/A	#N/A	#N/A	#N/A	#N/A	#N/A
P-0017636-T01-IM5	Male	Cutaneous Melanoma	Metastasis	Lymph Node, Regional	LR / In-Transit / Regional LN	IMPACTv5-CLIN-20170051	48.4	1	515	Skin, trunk	2	Yes	0	BRAF_CLASS_1_V600E	0	#N/A	#N/A	#N/A	#N/A	#N/A	#N/A	#N/A	#N/A	#N/A	#N/A	#N/A	#N/A	#N/A	#N/A	#N/A	#N/A	#N/A	#N/A	#N/A	#N/A	#N/A
P-0017683-T01-IM6	Male	Cutaneous Melanoma	Primary	Not Applicable	NA	IMPACTv6-CLIN-20170060	60.8	0	599	Skin, eyelid	1	Yes	0	BRAF_CLASS_2_3	1	Ipilimumab, Nivolumab	PD-1 Combo	0	0	11.5068	11.5068	62	0	172	0.699187	0	5.71429	1	9	9	1	0	0	0	M1b	M1b
P-0017690-T04-IM6	Male	Cutaneous Melanoma	Primary	Not Applicable	NA	IMPACTv6-CLIN-20180423R	76.8	0	228	Skin, arm/shoulder	3	No	0	NRAS_Q61	0	#N/A	#N/A	#N/A	#N/A	#N/A	#N/A	#N/A	#N/A	#N/A	#N/A	#N/A	#N/A	#N/A	#N/A	#N/A	#N/A	#N/A	#N/A	#N/A	#N/A	#N/A
P-0017702-T01-IM6	Male	Melanoma of Unknown Primary	Metastasis	Liver	Liver	IMPACTv6-CLIN-20170063	66	0	356	Unknown Primary	8	NA	0	NF1	1	Ipilimumab, Nivolumab	PD-1 Combo	0	0	8.21918	8.21918	66	0	Unknown	Unknown	Unknown	1.42105	0	9	9	0	0	0	1	M1c	M1c
P-0017744-T01-IM6	Male	Cutaneous Melanoma	Metastasis	Chest Wall	LR / In-Transit / Regional LN	IMPACTv6-CLIN-20170059	80.2	1	1429	Skin, trunk	2	No	0	NRAS_Q61	1	Pembrolizumab	PD-1 Mono	1	1	2.07123	14.3671	83	0	203	0.825203	0	5.8	1	0	1	1	0	0	1	M1c	M1c
P-0017797-T01-IM6	Male	Cutaneous Melanoma	Primary	Not Applicable	NA	IMPACTv6-CLIN-20170070	76.3	0	1136	Skin, trunk	2	Yes	1	NRAS_Q61	1	Ipilimumab, Nivolumab	PD-1 Combo	1	0	2.56438	35.4411	76	2	912	3.70732	1	1.7037	0	9	9	0	0	1	1	M1c	M1c
P-0017815-T01-IM6	Female	Melanoma of Unknown Primary	Metastasis	Bone	Bone	IMPACTv6-CLIN-20170062	45	1	100	Unknown Primary	8	NA	0	NF1	1	Ipilimumab, Nivolumab	PD-1 Combo	1	1	1.15068	1.15068	45	2	Unknown	Unknown	Unknown	7.25	1	9	9	1	0	1	1	M1c	M1c
P-0017830-T01-IM6	Male	Cutaneous Melanoma	Metastasis	In-transit	LR / In-Transit / Regional LN	IMPACTv6-CLIN-20170066	70.3	0	1647	Skin, scalp	1	Yes	0	NF1	1	Pembrolizumab	PD-1 Mono	0	0	37.0521	37.0521	72	1	173	0.703252	0	3.3	0	1	1	0	0	0	0	M0	M0
P-0017943-T01-IM6	Male	Cutaneous Melanoma	Metastasis	Soft Tissue	Soft Tissue / Distant LN	IMPACTv6-CLIN-20170072	47.7	0	4172	Skin, trunk	2	Yes	0	NRAS_Q61	1	Pembrolizumab	PD-1 Mono	0	0	32.9096	32.9096	56	0	184	0.747967	0	4	0	1	1	1	0	0	0	M1b	M1b
P-0017966-T01-IM6	Male	Cutaneous Melanoma	Metastasis	Lymph node, Non-Regional	Soft Tissue / Distant LN	IMPACTv6-CLIN-20170080	71.9	1	1838	Skin, trunk	2	Yes	0	BRAF_CLASS_1_Other	1	Pembrolizumab	PD-1 Mono	1	1	20.5151	29.5233	75	0	Unknown	Unknown	Unknown	Unknown	Unknown	Unknown	Unknown	1	0	1	0	M1c	M1c
P-0018031-T01-IM6	Male	Cutaneous Melanoma	Metastasis	In-transit	LR / In-Transit / Regional LN	IMPACTv6-CLIN-20170084	64.7	1	4579	Skin, leg/hip	4	No	0	NRAS_Q61	0	#N/A	#N/A	#N/A	#N/A	#N/A	#N/A	#N/A	#N/A	#N/A	#N/A	#N/A	#N/A	#N/A	#N/A	#N/A	#N/A	#N/A	#N/A	#N/A	#N/A	#N/A
P-0018042-T01-IM6	Female	Cutaneous Melanoma	Metastasis	In-transit	LR / In-Transit / Regional LN	IMPACTv6-CLIN-20170078	59.8	0	2178	Skin, arm/shoulder	3	No	0	RAS_OTHER	0	#N/A	#N/A	#N/A	#N/A	#N/A	#N/A	#N/A	#N/A	#N/A	#N/A	#N/A	#N/A	#N/A	#N/A	#N/A	#N/A	#N/A	#N/A	#N/A	#N/A	#N/A
P-0018059-T01-IM6	Male	Cutaneous Melanoma	Metastasis	Stomach	Other Visceral	IMPACTv6-CLIN-20170082	57.8	0	5064	Skin, trunk	2	No	0	NRAS_Q61	1	Pembrolizumab	PD-1 Mono	0	0	39.3534	39.3534	68	0	194	0.788618	0	2.29412	0	1	1	0	0	1	0	M1c	M1c
P-0018102-T01-IM6	Female	Cutaneous Melanoma	Metastasis	Lymph Node, Regional	LR / In-Transit / Regional LN	IMPACTv6-CLIN-20170083	38	0	81	Skin, trunk	2	No	0	BRAF_CLASS_1_V600E	0	#N/A	#N/A	#N/A	#N/A	#N/A	#N/A	#N/A	#N/A	#N/A	#N/A	#N/A	#N/A	#N/A	#N/A	#N/A	#N/A	#N/A	#N/A	#N/A	#N/A	#N/A
P-0018132-T01-IM6	Male	Cutaneous Melanoma	Metastasis	Liver	Liver	IMPACTv6-CLIN-20170088	62.3	0	1644	Skin, trunk	2	No	0	NRAS_Q61	1	Ipilimumab, Nivolumab	PD-1 Combo	0	0	36.9205	36.9205	64	1	371	1.50813	1	3.33333	0	9	9	0	0	0	1	M1c	M1c
P-0018187-T01-IM6	Male	Cutaneous Melanoma	Metastasis	Lymph Node, Regional	LR / In-Transit / Regional LN	IMPACTv6-CLIN-20170092	77.5	0	2201	Skin, scalp	1	No	0	BRAF_CLASS_2_3	0	#N/A	#N/A	#N/A	#N/A	#N/A	#N/A	#N/A	#N/A	#N/A	#N/A	#N/A	#N/A	#N/A	#N/A	#N/A	#N/A	#N/A	#N/A	#N/A	#N/A	#N/A
P-0018233-T01-IM6	Male	Cutaneous Melanoma	Metastasis	Lung	Lung	IMPACTv6-CLIN-20170091	63.6	0	1582	Skin, trunk	2	Yes	0	NRAS_Q61	1	Pembrolizumab	PD-1 Mono	0	0	41.4904	41.4904	65	0	204	0.829268	0	2.35	0	0	1	1	0	0	0	M1b	M1b
P-0018304-T01-IM6	Female	Melanoma of Unknown Primary	Metastasis	Lymph Node, Regional	LR / In-Transit / Regional LN	IMPACTv6-CLIN-20170097	70.6	0	1644	Unknown Primary	8	NA	0	NRAS_Q61	0	#N/A	#N/A	#N/A	#N/A	#N/A	#N/A	#N/A	#N/A	#N/A	#N/A	#N/A	#N/A	#N/A	#N/A	#N/A	#N/A	#N/A	#N/A	#N/A	#N/A	#N/A
P-0018422-T01-IM6	Male	Melanoma of Unknown Primary	Metastasis	Brain	Brain	IMPACTv6-CLIN-20170106	56.9	0	1428	Unknown Primary	8	NA	0	KIT_PDGFRA	0	#N/A	#N/A	#N/A	#N/A	#N/A	#N/A	#N/A	#N/A	#N/A	#N/A	#N/A	#N/A	#N/A	#N/A	#N/A	#N/A	#N/A	#N/A	#N/A	#N/A	#N/A
P-0018444-T01-IM6	Female	Melanoma of Unknown Primary	Metastasis	In-transit	LR / In-Transit / Regional LN	IMPACTv6-CLIN-20170107	79.8	0	1184	Unknown Primary	8	NA	0	NRAS_Q61	1	Pembrolizumab	PD-1 Mono	1	0	12.5918	37.3151	80	0	197	0.800813	0	2.26667	0	1	1	0	0	0	0	M0	M0
P-0018466-T01-IM6	Male	Cutaneous Melanoma	Metastasis	Lung	Lung	IMPACTv6-CLIN-20170105	71	0	1622	Skin, arm/shoulder	3	Yes	0	NRAS_Q61	1	Pembrolizumab	PD-1 Mono	1	0	8.90959	39.0575	72	0	190	0.772358	0	9	1	1	0	1	0	0	0	M1b	M1b
P-0018561-T01-IM6	Female	Cutaneous Melanoma	Metastasis	Liver	Liver	IMPACTv6-CLIN-20170113	59.4	0	3133	Skin, face	1	No	0	NF1	1	Ipilimumab, Nivolumab	PD-1 Combo	0	0	38.9589	38.9589	65	1	279	1.13415	1	7.66667	1	9	9	0	0	1	1	M1c	M1c
P-0018600-T01-IM6	Male	Cutaneous Melanoma	Metastasis	Bone	Bone	IMPACTv6-CLIN-20170118	88.4	1	2030	Skin, face	1	No	0	NF1	1	Pembrolizumab	PD-1 Mono	1	1	14.4986	38.1699	91	1	Unknown	Unknown	Unknown	1	0	1	1	0	0	1	0	M1c	M1c
P-0018656-T01-IM6	Male	Cutaneous Melanoma	Metastasis	Lung	Lung	IMPACTv6-CLIN-20170121	78.4	0	1839	Skin, neck	1	No	0	NF1	1	Pembrolizumab	PD-1 Mono	0	0	37.0192	37.0192	80	1	302	1.22764	1	2.30769	0	1	1	1	0	0	0	M1c	M1b
P-0018679-T01-IM6	Male	Melanoma of Unknown Primary	Metastasis	Liver	Liver	IMPACTv6-CLIN-20170125	74.9	0	94	Unknown Primary	8	NA	0	NF1	0	#N/A	#N/A	#N/A	#N/A	#N/A	#N/A	#N/A	#N/A	#N/A	#N/A	#N/A	#N/A	#N/A	#N/A	#N/A	#N/A	#N/A	#N/A	#N/A	#N/A	#N/A
P-0018759-T01-IM6	Male	Cutaneous Melanoma	Metastasis	Lung	Lung	IMPACTv6-CLIN-20170129	47.2	1	1791	Skin, trunk	2	No	0	BRAF_CLASS_1_V600E	1	Ipilimumab, Nivolumab	PD-1 Combo	1	1	3.22192	18.3123	51	0	592	2.4065	1	1.48756	0	9	9	1	0	0	0	M1c	M1b
P-0018783-T01-IM6	Female	Cutaneous Melanoma	Metastasis	Lung	Lung	IMPACTv6-CLIN-20170132	56.9	1	4868	Skin, trunk	2	No	0	NF1	1	Pembrolizumab	PD-1 Mono	1	1	8.28493	29.7205	68	0	195	0.792683	0	1.78571	0	1	1	1	0	0	0	M1b	M1b
P-0018819-T01-IM6	Male	Cutaneous Melanoma	Metastasis	Liver	Liver	IMPACTv6-CLIN-20170130	63.7	0	1541	Skin, trunk	2	Yes	0	NRAS_Q61	0	#N/A	#N/A	#N/A	#N/A	#N/A	#N/A	#N/A	#N/A	#N/A	#N/A	#N/A	#N/A	#N/A	#N/A	#N/A	#N/A	#N/A	#N/A	#N/A	#N/A	#N/A
P-0018843-T01-IM6	Male	Cutaneous Melanoma	Metastasis	Lymph Node, Regional	LR / In-Transit / Regional LN	IMPACTv6-CLIN-20170128	79.3	1	970	Skin, trunk	2	Yes	0	RAS_OTHER	1	Pembrolizumab	PD-1 Mono	1	1	2.69589	3.58356	82	2	Unknown	Unknown	Unknown	2.77273	0	1	1	1	0	0	1	M1c	M1c
P-0018854-T01-IM6	Female	Cutaneous Melanoma	Metastasis	Liver	Liver	IMPACTv6-CLIN-20170128	46.6	0	10481	Skin, neck	1	Unknown	0	BRAF_CLASS_1_V600E	1	Ipilimumab, Nivolumab	PD-1 Combo	0	0	35.6712	35.6712	72	0	207	0.841463	0	2.875	0	9	9	0	0	0	1	M1c	M1c
P-0019066-T01-IM6	Male	Melanoma of Unknown Primary	Metastasis	Bone	Bone	IMPACTv6-CLIN-20170146R	20	0	1376	Unknown Primary	8	NA	0	BRAF_CLASS_1_V600E	1	Pembrolizumab	PD-1 Mono	1	0	3.15616	40.1425	21	0	208	0.845528	0	9	1	0	0	0	0	1	0	M1c	M1c
P-0019137-T01-IM6	Female	Melanoma of Unknown Primary	Metastasis	Lymph Node, Regional	LR / In-Transit / Regional LN	IMPACTv6-CLIN-20170150	69.8	1	313	Unknown Primary	8	NA	0	RAS_OTHER	1	Ipilimumab, Nivolumab	PD-1 Combo	1	1	3.74795	9.13973	70	1	698	2.8374	1	3.63636	0	9	9	0	0	0	1	M1c	M1c
P-0019239-T01-IM6	Male	Cutaneous Melanoma	Primary	Not Applicable	NA	IMPACTv6-CLIN-20170158	61.8	0	257	Skin, trunk	2	No	0	BRAF_CLASS_1_Other	0	#N/A	#N/A	#N/A	#N/A	#N/A	#N/A	#N/A	#N/A	#N/A	#N/A	#N/A	#N/A	#N/A	#N/A	#N/A	#N/A	#N/A	#N/A	#N/A	#N/A	#N/A
P-0019263-T01-IM6	Female	Cutaneous Melanoma	Metastasis	In-transit	LR / In-Transit / Regional LN	IMPACTv6-CLIN-20170156	82.2	0	1225	Skin, scalp	1	Yes	0	KIT_PDGFRA	1	Pembrolizumab	PD-1 Mono	0	0	30.0822	30.0822	83	0	Unknown	Unknown	Unknown	2.88889	0	1	0	1	0	0	0	M1b	M1b
P-0019333-T01-IM6	Male	Cutaneous Melanoma	Metastasis	Lung	Lung	IMPACTv6-CLIN-20170161	58.7	0	2498	Skin, arm/shoulder	3	No	0	NF1	1	Nivolumab	PD-1 Mono	0	0	41.589	41.589	62	0	172	0.699187	0	3.07692	0	1	1	1	0	0	0	M1b	M1b
P-0019379-T01-IM6	Male	Cutaneous Melanoma	Metastasis	Retroperitoneum	Soft Tissue / Distant LN	IMPACTv6-CLIN-20170165	63.3	1	1787	Skin, arm/shoulder	3	No	0	NF1	1	Pembrolizumab	PD-1 Mono	1	1	2.16986	8.64658	67	0	182	0.739837	0	6.46154	1	0	1	0	0	0	0	M1a	M1a
P-0019443-T01-IM6	Female	Cutaneous Melanoma	Metastasis	Lymph Node, Regional	LR / In-Transit / Regional LN	IMPACTv6-CLIN-20170170	60.7	0	1114	Skin, leg/hip	4	Yes	0	BRAF_CLASS_1_V600E	1	Ipilimumab, Nivolumab	PD-1 Combo	0	0	29.9178	29.9178	61	1	359	1.45935	1	4.31579	0	9	9	1	0	1	1	M1c	M1c
P-0019490-T01-IM6	Female	Cutaneous Melanoma	Metastasis	In-transit	LR / In-Transit / Regional LN	IMPACTv6-CLIN-20170173	60.9	0	1209	Skin, scalp	1	No	0	NF1	1	Ipilimumab, Nivolumab	PD-1 Combo	0	0	38.3342	38.3342	61	0	233	0.947154	0	2.09091	0	9	9	0	0	0	0	M0	M0
P-0019557-T01-IM6	Female	Cutaneous Melanoma	Metastasis	Lymph Node, Regional	LR / In-Transit / Regional LN	IMPACTv6-CLIN-20170178	60.6	0	1239	Skin, leg/hip	4	Yes	0	NRAS_Q61	0	#N/A	#N/A	#N/A	#N/A	#N/A	#N/A	#N/A	#N/A	#N/A	#N/A	#N/A	#N/A	#N/A	#N/A	#N/A	#N/A	#N/A	#N/A	#N/A	#N/A	#N/A
P-0019569-T01-IM6	Male	Melanoma of Unknown Primary	Metastasis	Lymph Node, Regional	LR / In-Transit / Regional LN	IMPACTv6-CLIN-20170178	52.9	0	1991	Unknown Primary	8	NA	0	BRAF_CLASS_1_V600E	1	Pembrolizumab	PD-1 Mono	1	0	23.474	37.5123	55	0	172	0.699187	0	2.41667	0	1	1	1	0	0	0	M1b	M1b
P-0019720-T01-IM6	Male	Cutaneous Melanoma	Metastasis	Soft Tissue	Soft Tissue / Distant LN	IMPACTv6-CLIN-20170186	64.1	0	1875	Skin, arm/shoulder	3	No	0	NF1	1	Pembrolizumab	PD-1 Mono	0	0	37.8411	37.8411	66	0	197	0.800813	0	5.05	1	0	0	1	0	0	0	M1b	M1b
P-0019861-T01-IM6	Female	Cutaneous Melanoma	Metastasis	Lymph Node, Regional	LR / In-Transit / Regional LN	IMPACTv6-CLIN-20170195R	57.3	0	1051	Skin, scalp	1	Yes	0	BRAF_CLASS_1_V600E	0	#N/A	#N/A	#N/A	#N/A	#N/A	#N/A	#N/A	#N/A	#N/A	#N/A	#N/A	#N/A	#N/A	#N/A	#N/A	#N/A	#N/A	#N/A	#N/A	#N/A	#N/A
P-0019889-T02-IM6	Female	Cutaneous Melanoma	Metastasis	In-transit	LR / In-Transit / Regional LN	IMPACTv6-CLIN-20180614	35.6	0	105	Skin, scalp	1	No	0	Other_Driver	0	#N/A	#N/A	#N/A	#N/A	#N/A	#N/A	#N/A	#N/A	#N/A	#N/A	#N/A	#N/A	#N/A	#N/A	#N/A	#N/A	#N/A	#N/A	#N/A	#N/A	#N/A
P-0019909-T02-IM6	Male	Cutaneous Melanoma	Metastasis	Bone	Other Visceral	IMPACTv6-CLIN-20170263	62.9	1	363	Skin, scalp	1	No	0	NRAS_Q61	1	Pembrolizumab	PD-1 Mono	1	1	2.53151	9.86301	63	0	354	1.43902	1	2.41176	0	1	1	0	0	1	0	M1c	M1c
P-0019939-T01-IM6	Male	Cutaneous Melanoma	Metastasis	Lymph Node, Regional	LR / In-Transit / Regional LN	IMPACTv6-CLIN-20170201	73.5	0	1200	Skin, scalp	1	No	0	NF1	1	Pembrolizumab	PD-1 Mono	1	0	10.8164	34.0603	74	0	231	0.939024	0	3.8	0	1	0	0	0	0	0	M0	M0
P-0020082-T01-IM6	Male	Melanoma of Unknown Primary	Metastasis	Lung	Lung	IMPACTv6-CLIN-20170211	68.3	0	567	Unknown Primary	8	NA	0	NF1	0	#N/A	#N/A	#N/A	#N/A	#N/A	#N/A	#N/A	#N/A	#N/A	#N/A	#N/A	#N/A	#N/A	#N/A	#N/A	#N/A	#N/A	#N/A	#N/A	#N/A	#N/A
P-0020127-T01-IM6	Male	Cutaneous Melanoma	Metastasis	In-transit	LR / In-Transit / Regional LN	IMPACTv6-CLIN-20170218	65.6	1	2041	Skin, trunk	2	No	0	NRAS_Q61	1	Ipilimumab, Nivolumab	PD-1 Combo	1	1	3.12329	7.23288	71	1	353	1.43496	1	2.21053	0	9	9	0	0	0	0	M1c	M0
P-0020288-T03-IM6	Female	Cutaneous Melanoma	Metastasis	Lung	Lung	IMPACTv6-CLIN-20170366	72.5	0	1377	Skin, trunk	2	Yes	0	NRAS_Q61	1	Pembrolizumab	PD-1 Mono	1	0	1.51233	32.7452	74	1	192	0.780488	0	3.3913	0	1	1	1	0	0	0	M1b	M1b
P-0020307-T01-IM6	Male	Cutaneous Melanoma	Metastasis	Lymph Node, Regional	LR / In-Transit / Regional LN	IMPACTv6-CLIN-20170230	58.7	0	1504	Skin, arm/shoulder	3	Yes	0	BRAF_CLASS_1_Other	1	Ipilimumab, Nivolumab	PD-1 Combo	1	0	4.04384	32.2192	60	1	2386	9.69919	1	5.1068	1	9	9	1	0	0	1	M1c	M1c
P-0020319-T01-IM6	Male	Cutaneous Melanoma	Metastasis	Bowel	Other Visceral	IMPACTv6-CLIN-20170228	74	0	2494	Skin, leg/hip	4	Yes	0	NRAS_Q61	0	#N/A	#N/A	#N/A	#N/A	#N/A	#N/A	#N/A	#N/A	#N/A	#N/A	#N/A	#N/A	#N/A	#N/A	#N/A	#N/A	#N/A	#N/A	#N/A	#N/A	#N/A
P-0020382-T01-IM6	Male	Cutaneous Melanoma	Local Recurrence	Not Applicable	LR / In-Transit / Regional LN	IMPACTv6-CLIN-20170233	54.9	0	1720	Skin, leg/hip	4	No	0	RAS_OTHER	0	#N/A	#N/A	#N/A	#N/A	#N/A	#N/A	#N/A	#N/A	#N/A	#N/A	#N/A	#N/A	#N/A	#N/A	#N/A	#N/A	#N/A	#N/A	#N/A	#N/A	#N/A
P-0020388-T01-IM6	Female	Cutaneous Melanoma	Metastasis	Lymph Node, Regional	LR / In-Transit / Regional LN	IMPACTv6-CLIN-20170233	55.8	0	770	Skin, leg/hip	4	Yes	0	BRAF_CLASS_1_V600E	0	#N/A	#N/A	#N/A	#N/A	#N/A	#N/A	#N/A	#N/A	#N/A	#N/A	#N/A	#N/A	#N/A	#N/A	#N/A	#N/A	#N/A	#N/A	#N/A	#N/A	#N/A
P-0020564-T02-IM6	Female	Melanoma of Unknown Primary	Metastasis	Peritoneum	Other Visceral	IMPACTv6-CLIN-20180049	50.4	1	324	Unknown Primary	8	NA	0	BRAF_CLASS_1_V600E	1	Ipilimumab, Nivolumab	PD-1 Combo	1	1	1.44658	10.0274	51	1	282	1.128	1	9.5	1	9	9	1	1	1	1	M1c	M1d
P-0020638-T01-IM6	Male	Cutaneous Melanoma	Metastasis	Lymph Node, Regional	LR / In-Transit / Regional LN	IMPACTv6-CLIN-20170250	61.1	0	1225	Skin, face	1	Yes	0	BRAF_CLASS_1_Other	1	Pembrolizumab	PD-1 Mono	0	0	30.7726	30.7726	62	0	225	0.914634	0	5.85714	1	0	0	1	0	0	0	M1b	M1b
P-0020641-T01-IM6	Female	Cutaneous Melanoma	Metastasis	In-transit	LR / In-Transit / Regional LN	IMPACTv6-CLIN-20170249	72.3	0	4718	Skin, leg/hip	4	No	0	BRAF_CLASS_2_3	1	Pembrolizumab	PD-1 Mono	0	0	35.9342	35.9342	82	1	1437	5.84146	1	5.6	1	0	0	1	1	1	1	M1c	M1d
P-0020691-T01-IM6	Female	Melanoma of Unknown Primary	Metastasis	Soft Tissue	Soft Tissue / Distant LN	IMPACTv6-CLIN-20170256	65.1	1	605	Unknown Primary	8	NA	0	BRAF_CLASS_1_V600E	1	Pembrolizumab	PD-1 Mono	1	1	4.14247	18.6082	65	0	201	0.817073	0	6.0163	1	1	0	1	0	1	1	M1c	M1c
P-0020768-T01-IM6	Male	Cutaneous Melanoma	Metastasis	Liver	Liver	IMPACTv6-CLIN-20170259	31.8	0	1581	Skin, trunk	2	Yes	0	BRAF_CLASS_1_V600E	0	#N/A	#N/A	#N/A	#N/A	#N/A	#N/A	#N/A	#N/A	#N/A	#N/A	#N/A	#N/A	#N/A	#N/A	#N/A	#N/A	#N/A	#N/A	#N/A	#N/A	#N/A
P-0020817-T01-IM6	Male	Cutaneous Melanoma	Primary	Not Applicable	NA	IMPACTv6-CLIN-20170261	61.2	0	2932	Skin, face	1	No	0	NF1	1	Ipilimumab, Nivolumab	PD-1 Combo	1	0	8.28493	38.1699	66	0	171	0.695122	0	10.75	1	9	9	1	1	0	0	M1c	M1d
P-0020885-T01-IM6	Male	Cutaneous Melanoma	Metastasis	Lymph Node, Regional	LR / In-Transit / Regional LN	IMPACTv6-CLIN-20170266	45.4	0	1748	Skin, trunk	2	Yes	0	BRAF_CLASS_1_V600E	1	Pembrolizumab	PD-1 Mono	1	0	3.91233	33.3699	48	0	301	1.22358	1	2.99083	0	1	1	0	0	0	0	M1c	M0
P-0020913-T01-IM6	Male	Cutaneous Melanoma	Metastasis	Lymph Node, Regional	LR / In-Transit / Regional LN	IMPACTv6-CLIN-20170277	64.7	0	1182	Skin, trunk	2	No	0	BRAF_CLASS_1_V600E	0	#N/A	#N/A	#N/A	#N/A	#N/A	#N/A	#N/A	#N/A	#N/A	#N/A	#N/A	#N/A	#N/A	#N/A	#N/A	#N/A	#N/A	#N/A	#N/A	#N/A	#N/A
P-0020957-T01-IM6	Male	Cutaneous Melanoma	Metastasis	Lung	Lung	IMPACTv6-CLIN-20170272	53.3	1	10551	Skin, trunk	2	Unknown	0	NF1	1	Pembrolizumab	PD-1 Mono	1	1	6.70685	10.9151	81	0	249	1.0122	1	4.73214	1	1	0	1	1	1	1	M1c	M1d
P-0021046-T01-IM6	Male	Melanoma of Unknown Primary	Metastasis	Lung	Lung	IMPACTv6-CLIN-20170279	73.5	1	439	Unknown Primary	8	NA	0	Other_Driver	0	#N/A	#N/A	#N/A	#N/A	#N/A	#N/A	#N/A	#N/A	#N/A	#N/A	#N/A	#N/A	#N/A	#N/A	#N/A	#N/A	#N/A	#N/A	#N/A	#N/A	#N/A
P-0021075-T01-IM6	Male	Cutaneous Melanoma	Metastasis	Lung	Lung	IMPACTv6-CLIN-20170280	72.9	0	1652	Skin, face	1	Yes	0	BRAF_CLASS_1_Other	1	Pembrolizumab	PD-1 Mono	0	0	35.6384	35.6384	74	1	211	0.857724	0	2.07692	0	1	1	1	0	0	0	M1b	M1b
P-0021121-T01-IM6	Female	Cutaneous Melanoma	Metastasis	Lymph Node, Regional	LR / In-Transit / Regional LN	IMPACTv6-CLIN-20170281	53.2	0	7140	Skin, leg/hip	4	Unknown	0	NRAS_Q61	1	Ipilimumab, Nivolumab	PD-1 Combo	0	0	8.38356	8.38356	72	0	179	0.716	0	2.23529	0	9	9	0	0	0	0	M1a	M1a
P-0021169-T01-IM6	Male	Melanoma of Unknown Primary	Metastasis	Brain	Brain	IMPACTv6-CLIN-20170285	88.3	1	21	Unknown Primary	8	NA	0	NF1	0	#N/A	#N/A	#N/A	#N/A	#N/A	#N/A	#N/A	#N/A	#N/A	#N/A	#N/A	#N/A	#N/A	#N/A	#N/A	#N/A	#N/A	#N/A	#N/A	#N/A	#N/A
P-0021174-T01-IM6	Female	Cutaneous Melanoma	Metastasis	In-transit	LR / In-Transit / Regional LN	IMPACTv6-CLIN-20170282	50.4	0	1492	Skin, leg/hip	4	No	0	NRAS_Q61	0	#N/A	#N/A	#N/A	#N/A	#N/A	#N/A	#N/A	#N/A	#N/A	#N/A	#N/A	#N/A	#N/A	#N/A	#N/A	#N/A	#N/A	#N/A	#N/A	#N/A	#N/A
P-0021223-T01-IM6	Female	Melanoma of Unknown Primary	Metastasis	Lymph Node, Regional	LR / In-Transit / Regional LN	IMPACTv6-CLIN-20170287	66.2	0	624	Unknown Primary	8	NA	0	Other_Driver	0	#N/A	#N/A	#N/A	#N/A	#N/A	#N/A	#N/A	#N/A	#N/A	#N/A	#N/A	#N/A	#N/A	#N/A	#N/A	#N/A	#N/A	#N/A	#N/A	#N/A	#N/A
P-0021331-T01-IM6	Male	Cutaneous Melanoma	Metastasis	Liver	Liver	IMPACTv6-CLIN-20170299	51.9	0	4695	Skin, neck	1	Unknown	0	BRAF_CLASS_1_V600E	1	Ipilimumab, Nivolumab	PD-1 Combo	1	0	1.77534	13.9726	64	0	200	0.813008	0	0.72	0	9	9	1	1	0	1	M1c	M1d
P-0021365-T01-IM6	Female	Cutaneous Melanoma	Primary	Not Applicable	NA	IMPACTv6-CLIN-20170295	7.9	0	168	Skin, leg/hip	4	No	0	Other_Driver	0	#N/A	#N/A	#N/A	#N/A	#N/A	#N/A	#N/A	#N/A	#N/A	#N/A	#N/A	#N/A	#N/A	#N/A	#N/A	#N/A	#N/A	#N/A	#N/A	#N/A	#N/A
P-0021440-T01-IM6	Male	Cutaneous Melanoma	Primary	Not Applicable	NA	IMPACTv6-CLIN-20170301	61.9	1	2007	Skin, trunk	2	No	0	BRAF_CLASS_1_V600E	1	Ipilimumab, Nivolumab	PD-1 Combo	1	1	2.63014	3.48493	67	1	503	2.04472	1	3.09091	0	9	9	0	1	1	1	M1c	M1d
P-0021441-T01-IM6	Male	Cutaneous Melanoma	Metastasis	In-transit	LR / In-Transit / Regional LN	IMPACTv6-CLIN-20170301	56.9	0	1506	Skin, scalp	1	No	0	BRAF_CLASS_1_V600E	1	Pembrolizumab	PD-1 Mono	1	0	5.49041	20.6137	59	0	175	0.711382	0	2.09091	0	1	1	0	0	1	1	M1c	M1c
P-0021458-T01-IM6	Male	Cutaneous Melanoma	Metastasis	Lymph Node, Regional	LR / In-Transit / Regional LN	IMPACTv6-CLIN-20170307	49.6	0	1078	Skin, arm/shoulder	3	Yes	0	BRAF_CLASS_2_3	1	Pembrolizumab	PD-1 Mono	0	0	31.7589	31.7589	50	1	Unknown	Unknown	Unknown	6.21505	1	0	0	1	0	0	1	M1c	M1c
P-0021469-T01-IM6	Male	Cutaneous Melanoma	Metastasis	Lymph Node, Regional	LR / In-Transit / Regional LN	IMPACTv6-CLIN-20170308	60.8	0	1015	Skin, trunk	2	Yes	0	BRAF_CLASS_2_3	0	#N/A	#N/A	#N/A	#N/A	#N/A	#N/A	#N/A	#N/A	#N/A	#N/A	#N/A	#N/A	#N/A	#N/A	#N/A	#N/A	#N/A	#N/A	#N/A	#N/A	#N/A
P-0021504-T01-IM6	Female	Cutaneous Melanoma	Metastasis	In-transit	LR / In-Transit / Regional LN	IMPACTv6-CLIN-20170310	67.8	0	1097	Skin, foot	4	Yes	0	BRAF_CLASS_1_V600E	1	Pembrolizumab	PD-1 Mono	1	0	31.0685	34.7178	68	0	169	0.686992	0	1.53333	0	1	1	0	0	1	0	M1c	M1c
P-0021526-T01-IM6	Female	Cutaneous Melanoma	Metastasis	Lymph Node, Regional	LR / In-Transit / Regional LN	IMPACTv6-CLIN-20170312	73.9	0	1267	Skin, leg/hip	4	Yes	0	NRAS_Q61	0	#N/A	#N/A	#N/A	#N/A	#N/A	#N/A	#N/A	#N/A	#N/A	#N/A	#N/A	#N/A	#N/A	#N/A	#N/A	#N/A	#N/A	#N/A	#N/A	#N/A	#N/A
P-0021584-T01-IM6	Female	Cutaneous Melanoma	Primary	Not Applicable	NA	IMPACTv6-CLIN-20170315	41.1	0	568	Skin, leg/hip	4	No	0	BRAF_CLASS_1_V600E	0	#N/A	#N/A	#N/A	#N/A	#N/A	#N/A	#N/A	#N/A	#N/A	#N/A	#N/A	#N/A	#N/A	#N/A	#N/A	#N/A	#N/A	#N/A	#N/A	#N/A	#N/A
P-0021708-T01-IM6	Male	Cutaneous Melanoma	Metastasis	Soft Tissue	Soft Tissue / Distant LN	IMPACTv6-CLIN-20170321	90.5	1	794	Skin, face	1	No	0	NF1	1	Pembrolizumab	PD-1 Mono	1	1	6.73973	6.73973	92	1	214	0.869919	0	12.4507	1	1	0	1	1	0	0	M1c	M1d
P-0021737-T01-IM6	Male	Melanoma of Unknown Primary	Metastasis	Liver	Liver	IMPACTv6-CLIN-20170323	69.3	0	1113	Unknown Primary	8	NA	0	BRAF_CLASS_1_V600E	1	Ipilimumab, Nivolumab	PD-1 Combo	1	0	8.25205	35.9671	69	1	227	0.922764	0	2.26639	0	9	9	1	0	0	1	M1c	M1c
P-0021743-T01-IM6	Male	Melanoma of Unknown Primary	Metastasis	Liver	Liver	IMPACTv6-CLIN-20170323	89	0	1094	Unknown Primary	8	NA	0	Unknown_Driver	1	Pembrolizumab	PD-1 Mono	0	0	34.9808	34.9808	89	2	188	0.764228	0	4.05882	0	0	1	1	0	1	1	M1c	M1c
P-0021774-T02-IM6	Male	Cutaneous Melanoma	Metastasis	Lymph Node, Regional	LR / In-Transit / Regional LN	IMPACTv6-CLIN-20170346	55.1	1	2341	Skin, neck	1	No	0	NF1	1	Pembrolizumab	PD-1 Mono	1	1	8.08767	33.5342	59	0	207	0.841463	0	2.71429	0	1	1	1	0	0	0	M1c	M1c
P-0021783-T01-IM6	Male	Cutaneous Melanoma	Metastasis	Lymph Node, Regional	LR / In-Transit / Regional LN	IMPACTv6-CLIN-20170328	76.6	0	1299	Skin, scalp	1	No	0	BRAF_CLASS_1_Other	1	Pembrolizumab	PD-1 Mono	1	0	0.953425	35.4082	77	0	249	1.0122	1	4.06667	0	1	0	0	0	0	0	M1c	M0
P-0021842-T01-IM6	Male	Cutaneous Melanoma	Metastasis	Brain	Brain	IMPACTv6-CLIN-20170332	66	0	2819	Skin, leg/hip	4	Yes	0	NRAS_Q61	0	#N/A	#N/A	#N/A	#N/A	#N/A	#N/A	#N/A	#N/A	#N/A	#N/A	#N/A	#N/A	#N/A	#N/A	#N/A	#N/A	#N/A	#N/A	#N/A	#N/A	#N/A
P-0021846-T01-IM6	Male	Cutaneous Melanoma	Metastasis	Colon	Other Visceral	IMPACTv6-CLIN-20170333	68.9	0	3368	Skin, external ear	1	Yes	0	NF1	1	Pembrolizumab	PD-1 Mono	1	0	12.4274	21.6	76	0	170	0.691057	0	2.15385	0	1	1	0	0	0	0	M1c	M1c
P-0021847-T01-IM6	Male	Cutaneous Melanoma	Primary	Not Applicable	NA	IMPACTv6-CLIN-20170333	73.2	0	541	Skin, scalp	1	No	0	NF1	0	#N/A	#N/A	#N/A	#N/A	#N/A	#N/A	#N/A	#N/A	#N/A	#N/A	#N/A	#N/A	#N/A	#N/A	#N/A	#N/A	#N/A	#N/A	#N/A	#N/A	#N/A
P-0021934-T01-IM6	Male	Cutaneous Melanoma	Metastasis	Ileum	Other Visceral	IMPACTv6-CLIN-20170334	68.9	0	4843	Skin, trunk	2	Unknown	0	Other_Driver	1	Pembrolizumab	PD-1 Mono	0	0	27.3863	27.3863	80	1	258	1.04878	1	5.23529	1	0	0	1	0	0	0	M1c	M1c
P-0021948-T01-IM6	Female	Cutaneous Melanoma	Primary	Not Applicable	NA	IMPACTv6-CLIN-20170334	61.4	0	2365	Skin, face	1	No	0	NF1	0	#N/A	#N/A	#N/A	#N/A	#N/A	#N/A	#N/A	#N/A	#N/A	#N/A	#N/A	#N/A	#N/A	#N/A	#N/A	#N/A	#N/A	#N/A	#N/A	#N/A	#N/A
P-0021968-T01-IM6	Male	Cutaneous Melanoma	Primary	Not Applicable	NA	IMPACTv6-CLIN-20170340	65.9	0	1211	Skin, scalp	1	Yes	0	KIT_PDGFRA	1	Pembrolizumab	PD-1 Mono	0	0	38.0384	38.0384	66	0	176	0.715447	0	3.5	0	1	1	1	1	0	0	M1c	M1d
P-0021995-T01-IM6	Male	Cutaneous Melanoma	Metastasis	Lymph Node, Regional	LR / In-Transit / Regional LN	IMPACTv6-CLIN-20170343	62.1	0	1232	Skin, trunk	2	Yes	0	NRAS_Q61	1	Ipilimumab, Nivolumab	PD-1 Combo	0	0	26.2356	26.2356	63	1	772	3.088	1	4.91667	1	9	9	1	1	0	1	M1c	M1d
P-0022012-T01-IM6	Male	Melanoma of Unknown Primary	Metastasis	Brain	Brain	IMPACTv6-CLIN-20170338	71.6	1	200	Unknown Primary	8	NA	0	Unknown_Driver	1	Nivolumab	PD-1 Mono	1	1	1.08493	1.08493	72	3	274	1.11382	1	2.5	0	0	1	0	1	0	0	M1c	M1d
P-0022019-T01-IM6	Male	Cutaneous Melanoma	Metastasis	Liver	Liver	IMPACTv6-CLIN-20170338	78.1	0	1204	Skin, scalp	1	No	0	NF1	1	Ipilimumab, Nivolumab	PD-1 Combo	0	0	29.7863	29.7863	79	0	182	0.739837	0	7.125	1	9	9	1	0	0	1	M1c	M1c
P-0022042-T01-IM6	Female	Melanoma of Unknown Primary	Metastasis	In-transit	LR / In-Transit / Regional LN	IMPACTv6-CLIN-20170341	52.9	0	685	Unknown Primary	8	NA	0	NRAS_Q61	0	#N/A	#N/A	#N/A	#N/A	#N/A	#N/A	#N/A	#N/A	#N/A	#N/A	#N/A	#N/A	#N/A	#N/A	#N/A	#N/A	#N/A	#N/A	#N/A	#N/A	#N/A
P-0022096-T01-IM6	Male	Cutaneous Melanoma	Metastasis	Lymph Node, Regional	LR / In-Transit / Regional LN	IMPACTv6-CLIN-20170347	73.8	0	1982	Skin, face	1	No	0	NF1	1	Pembrolizumab	PD-1 Mono	0	0	31.9233	31.9233	77	0	Unknown	Unknown	Unknown	1.375	0	1	1	0	0	0	0	M1c	M1c
P-0022123-T01-IM6	Male	Cutaneous Melanoma	Metastasis	Lung	Lung	IMPACTv6-CLIN-20170350	58.4	1	4621	Skin, external ear	1	Unknown	0	NF1	1	Ipilimumab, Nivolumab	PD-1 Combo	1	1	9.79726	25.874	69	0	Unknown	Unknown	Unknown	Unknown	Unknown	9	9	1	0	0	1	M1c	M1c
P-0022140-T01-IM6	Male	Melanoma of Unknown Primary	Metastasis	In-transit	LR / In-Transit / Regional LN	IMPACTv6-CLIN-20170348	69	0	609	Unknown Primary	8	NA	0	NRAS_Q61	0	#N/A	#N/A	#N/A	#N/A	#N/A	#N/A	#N/A	#N/A	#N/A	#N/A	#N/A	#N/A	#N/A	#N/A	#N/A	#N/A	#N/A	#N/A	#N/A	#N/A	#N/A
P-0022146-T01-IM6	Male	Melanoma of Unknown Primary	Metastasis	Lymph Node, Regional	LR / In-Transit / Regional LN	IMPACTv6-CLIN-20170349	34.7	1	606	Unknown Primary	8	NA	0	BRAF_CLASS_1_V600E	0	#N/A	#N/A	#N/A	#N/A	#N/A	#N/A	#N/A	#N/A	#N/A	#N/A	#N/A	#N/A	#N/A	#N/A	#N/A	#N/A	#N/A	#N/A	#N/A	#N/A	#N/A
P-0022168-T01-IM6	Male	Cutaneous Melanoma	Metastasis	Lung	Lung	IMPACTv6-CLIN-20170352	58.8	1	1178	Skin, scalp	1	No	0	BRAF_CLASS_1_Other	1	Pembrolizumab	PD-1 Mono	1	1	3.51781	23.9342	60	0	154	0.626016	0	2.26667	0	0	1	1	0	0	0	M1b	M1b
P-0022177-T01-IM6	Male	Cutaneous Melanoma	Metastasis	Soft Tissue	Soft Tissue / Distant LN	IMPACTv6-CLIN-20170353	63.2	0	1596	Skin, leg/hip	4	Yes	0	BRAF_CLASS_1_V600E	0	#N/A	#N/A	#N/A	#N/A	#N/A	#N/A	#N/A	#N/A	#N/A	#N/A	#N/A	#N/A	#N/A	#N/A	#N/A	#N/A	#N/A	#N/A	#N/A	#N/A	#N/A
P-0022232-T01-IM6	Female	Cutaneous Melanoma	Metastasis	Lymph Node, Regional	LR / In-Transit / Regional LN	IMPACTv6-CLIN-20170354	63.3	0	648	Skin, scalp	1	Unknown	0	BRAF_CLASS_1_Other	0	#N/A	#N/A	#N/A	#N/A	#N/A	#N/A	#N/A	#N/A	#N/A	#N/A	#N/A	#N/A	#N/A	#N/A	#N/A	#N/A	#N/A	#N/A	#N/A	#N/A	#N/A
P-0022308-T01-IM6	Male	Cutaneous Melanoma	Metastasis	Lymph Node, Regional	LR / In-Transit / Regional LN	IMPACTv6-CLIN-20170357	18	0	315	Skin, scalp	1	Yes	0	BRAF_CLASS_1_V600E	0	#N/A	#N/A	#N/A	#N/A	#N/A	#N/A	#N/A	#N/A	#N/A	#N/A	#N/A	#N/A	#N/A	#N/A	#N/A	#N/A	#N/A	#N/A	#N/A	#N/A	#N/A
P-0022366-T01-IM6	Male	Cutaneous Melanoma	Primary	Not Applicable	NA	IMPACTv6-CLIN-20170360	74.7	0	63	Skin, trunk	2	No	0	BRAF_CLASS_1_V600E	0	#N/A	#N/A	#N/A	#N/A	#N/A	#N/A	#N/A	#N/A	#N/A	#N/A	#N/A	#N/A	#N/A	#N/A	#N/A	#N/A	#N/A	#N/A	#N/A	#N/A	#N/A
P-0022384-T01-IM6	Male	Cutaneous Melanoma	Metastasis	In-transit	LR / In-Transit / Regional LN	IMPACTv6-CLIN-20170361	70.5	0	1112	Skin, arm/shoulder	3	No	0	NRAS_Q61	1	Pembrolizumab	PD-1 Mono	1	0	6.73973	33.3699	71	0	213	0.865854	0	4.23529	0	1	0	0	0	0	0	M0	M0
P-0022392-T01-IM6	Female	Melanoma of Unknown Primary	Metastasis	In-transit	LR / In-Transit / Regional LN	IMPACTv6-CLIN-20170361	46.2	0	613	Unknown Primary	8	NA	0	Unknown_Driver	0	#N/A	#N/A	#N/A	#N/A	#N/A	#N/A	#N/A	#N/A	#N/A	#N/A	#N/A	#N/A	#N/A	#N/A	#N/A	#N/A	#N/A	#N/A	#N/A	#N/A	#N/A
P-0022471-T01-IM6	Male	Cutaneous Melanoma	Primary	Not Applicable	NA	IMPACTv6-CLIN-20170371	81.1	0	1099	Skin, leg/hip	4	Yes	0	NF1	1	Pembrolizumab	PD-1 Mono	1	0	4.3726	34.389	81	0	216	0.878049	0	6.9	1	0	0	0	0	0	0	M1a	M1a
P-0022542-T02-IM6	Male	Cutaneous Melanoma	Local Recurrence	Not Applicable	LR / In-Transit / Regional LN	IMPACTv6-CLIN-20170429	69.8	0	829	Skin, face	1	No	0	BRAF_CLASS_1_Other	0	#N/A	#N/A	#N/A	#N/A	#N/A	#N/A	#N/A	#N/A	#N/A	#N/A	#N/A	#N/A	#N/A	#N/A	#N/A	#N/A	#N/A	#N/A	#N/A	#N/A	#N/A
P-0022570-T01-IM6	Male	Cutaneous Melanoma	Metastasis	Lung	Lung	IMPACTv6-CLIN-20170374	50.8	0	2420	Skin, leg/hip	4	Yes	0	Unknown_Driver	1	Pembrolizumab	PD-1 Mono	0	0	29.9178	29.9178	55	0	148	0.601626	0	1.21429	0	1	1	1	0	0	0	M1b	M1b
P-0022670-T01-IM6	Male	Cutaneous Melanoma	Primary	Not Applicable	NA	IMPACTv6-CLIN-20170384	63.5	1	576	Skin, hand	3	Yes	0	BRAF_CLASS_1_V600E	1	Pembrolizumab	PD-1 Mono	1	1	4.07671	13.2164	64	0	262	1.06504	1	2.2	0	1	1	0	0	0	0	M1c	M0
P-0022680-T01-IM6	Male	Melanoma of Unknown Primary	Metastasis	Lung	Lung	IMPACTv6-CLIN-20170383	65.8	1	428	Unknown Primary	8	NA	0	BRAF_CLASS_1_Other	1	Ipilimumab, Nivolumab	PD-1 Combo	1	1	8.12055	13.3808	66	1	270	1.09756	1	4.8	1	9	9	1	1	0	0	M1c	M1d
P-0022702-T01-IM6	Male	Cutaneous Melanoma	Metastasis	In-transit	LR / In-Transit / Regional LN	IMPACTv6-CLIN-20170381	76.2	1	1715	Skin, leg/hip	4	No	1	NRAS_Q61	0	#N/A	#N/A	#N/A	#N/A	#N/A	#N/A	#N/A	#N/A	#N/A	#N/A	#N/A	#N/A	#N/A	#N/A	#N/A	#N/A	#N/A	#N/A	#N/A	#N/A	#N/A
P-0022743-T01-IM6	Male	Cutaneous Melanoma	Metastasis	Soft Tissue	Soft Tissue / Distant LN	IMPACTv6-CLIN-20170388	76.9	0	2910	Skin, neck	1	No	0	NF1	1	Pembrolizumab	PD-1 Mono	0	0	34.126	34.126	82	0	179	0.727642	0	3.07692	0	1	1	0	0	0	0	M1a	M1a
P-0022759-T01-IM6	Female	Cutaneous Melanoma	Metastasis	Lymph Node, Regional	LR / In-Transit / Regional LN	IMPACTv6-CLIN-20170387	70.4	0	944	Skin, trunk	2	Yes	0	NRAS_Q61	0	#N/A	#N/A	#N/A	#N/A	#N/A	#N/A	#N/A	#N/A	#N/A	#N/A	#N/A	#N/A	#N/A	#N/A	#N/A	#N/A	#N/A	#N/A	#N/A	#N/A	#N/A
P-0022795-T01-IM6	Male	Cutaneous Melanoma	Primary	Skin	NA	IMPACTv6-CLIN-20170391	74.9	1	386	Skin, scalp	1	No	0	RAS_OTHER	1	Nivolumab	PD-1 Mono	1	1	2.33425	2.33425	76	1	255	1.02	1	3.4	0	1	1	0	0	0	0	M1c	M0
P-0022807-T04-IM6	Male	Cutaneous Melanoma	Primary	Not Applicable	NA	IMPACTv6-CLIN-20180629	60	0	1058	Skin, arm/shoulder	3	No	0	RAS_OTHER	1	Nivolumab	PD-1 Mono	0	0	16.4384	16.4384	62	0	154	0.616	0	3.57143	0	0	1	1	0	0	0	M1b	M1b
P-0022827-T03-IM6	Male	Cutaneous Melanoma	Metastasis	Lymph Node, Regional	LR / In-Transit / Regional LN	IMPACTv6-CLIN-20170560	75.5	0	619	Skin, trunk	2	Yes	0	NF1	0	#N/A	#N/A	#N/A	#N/A	#N/A	#N/A	#N/A	#N/A	#N/A	#N/A	#N/A	#N/A	#N/A	#N/A	#N/A	#N/A	#N/A	#N/A	#N/A	#N/A	#N/A
P-0022885-T01-IM6	Female	Melanoma of Unknown Primary	Metastasis	Bone	Bone	IMPACTv6-CLIN-20170397	65	0	1050	Unknown Primary	8	NA	0	BRAF_CLASS_1_V600E	1	Ipilimumab, Nivolumab	PD-1 Combo	0	0	32.9425	32.9425	65	1	Unknown	Unknown	Unknown	2.85714	0	9	9	1	0	1	0	M1c	M1c
P-0022886-T01-IM6	Male	Cutaneous Melanoma	Metastasis	Small Bowel	Other Visceral	IMPACTv6-CLIN-20170397	43.8	1	3507	Skin, trunk	2	No	0	Unknown_Driver	0	#N/A	#N/A	#N/A	#N/A	#N/A	#N/A	#N/A	#N/A	#N/A	#N/A	#N/A	#N/A	#N/A	#N/A	#N/A	#N/A	#N/A	#N/A	#N/A	#N/A	#N/A
P-0022986-T01-IM6	Female	Cutaneous Melanoma	Metastasis	Lymph Node, Regional	LR / In-Transit / Regional LN	IMPACTv6-CLIN-20170400	27.7	1	6366	Skin, trunk	2	Unknown	0	BRAF_CLASS_1_V600E	0	#N/A	#N/A	#N/A	#N/A	#N/A	#N/A	#N/A	#N/A	#N/A	#N/A	#N/A	#N/A	#N/A	#N/A	#N/A	#N/A	#N/A	#N/A	#N/A	#N/A	#N/A
P-0023032-T01-IM6	Male	Cutaneous Melanoma	Metastasis	In-transit	LR / In-Transit / Regional LN	IMPACTv6-CLIN-20170408	67.3	0	1566	Skin, trunk	2	No	0	NRAS_Q61	0	#N/A	#N/A	#N/A	#N/A	#N/A	#N/A	#N/A	#N/A	#N/A	#N/A	#N/A	#N/A	#N/A	#N/A	#N/A	#N/A	#N/A	#N/A	#N/A	#N/A	#N/A
P-0023041-T01-IM6	Male	Cutaneous Melanoma	Primary	Not Applicable	NA	IMPACTv6-CLIN-20170406	61.4	0	2421	Skin, trunk	2	Yes	0	NF1	1	Pembrolizumab	PD-1 Mono	1	0	13.3479	33.2384	65	0	281	1.14228	1	1.73913	0	0	1	1	0	0	0	M1c	M1b
P-0023055-T01-IM6	Male	Cutaneous Melanoma	Metastasis	Lymph Node, Regional	LR / In-Transit / Regional LN	IMPACTv6-CLIN-20170407	60.2	0	645	Skin, leg/hip	4	Yes	0	BRAF_CLASS_1_V600E	0	#N/A	#N/A	#N/A	#N/A	#N/A	#N/A	#N/A	#N/A	#N/A	#N/A	#N/A	#N/A	#N/A	#N/A	#N/A	#N/A	#N/A	#N/A	#N/A	#N/A	#N/A
P-0023139-T01-IM6	Male	Cutaneous Melanoma	Metastasis	Soft Tissue	Soft Tissue / Distant LN	IMPACTv6-CLIN-20170412	71	0	2531	Skin, scalp	1	No	0	BRAF_CLASS_1_Other	1	Pembrolizumab	PD-1 Mono	0	0	32.6795	32.6795	75	1	310	1.26016	1	2.92857	0	1	1	1	0	0	0	M1c	M1b
P-0023163-T01-IM6	Male	Cutaneous Melanoma	Metastasis	Adrenal Gland	Other Visceral	IMPACTv6-CLIN-20170414	56.3	0	1300	Skin, arm/shoulder	3	Yes	0	NF1	1	Pembrolizumab	PD-1 Mono	0	0	33.8301	33.8301	57	0	204	0.829268	0	2.93333	0	1	1	0	0	0	0	M1c	M1c
P-0023356-T01-IM6	Female	Cutaneous Melanoma	Metastasis		LR / In-Transit / Regional LN	IMPACTv6-CLIN-20170424	57	0	2522	Skin, leg/hip	4	Yes	0	BRAF_CLASS_1_Other	0	#N/A	#N/A	#N/A	#N/A	#N/A	#N/A	#N/A	#N/A	#N/A	#N/A	#N/A	#N/A	#N/A	#N/A	#N/A	#N/A	#N/A	#N/A	#N/A	#N/A	#N/A
P-0023378-T01-IM6	Female	Cutaneous Melanoma	Metastasis	In-transit	LR / In-Transit / Regional LN	IMPACTv6-CLIN-20170427	32.9	0	11471	Skin, trunk	2	Unknown	0	BRAF_CLASS_2_3	0	#N/A	#N/A	#N/A	#N/A	#N/A	#N/A	#N/A	#N/A	#N/A	#N/A	#N/A	#N/A	#N/A	#N/A	#N/A	#N/A	#N/A	#N/A	#N/A	#N/A	#N/A
P-0023510-T01-IM6	Male	Cutaneous Melanoma	Metastasis	In-transit	LR / In-Transit / Regional LN	IMPACTv6-CLIN-20170439	74	0	791	Unknown	9	NA	0	NF1	1	Pembrolizumab	PD-1 Mono	0	0	24.8548	24.8548	74	0	190	0.772358	0	2.2381	0	1	1	0	0	0	0	M0	M0
P-0023645-T01-IM6	Female	Cutaneous Melanoma	Metastasis	In-transit	LR / In-Transit / Regional LN	IMPACTv6-CLIN-20170443R	48.2	0	2662	Skin, leg/hip	4	Unknown	0	BRAF_CLASS_1_V600E	0	#N/A	#N/A	#N/A	#N/A	#N/A	#N/A	#N/A	#N/A	#N/A	#N/A	#N/A	#N/A	#N/A	#N/A	#N/A	#N/A	#N/A	#N/A	#N/A	#N/A	#N/A
P-0023733-T01-IM6	Female	Melanoma of Unknown Primary	Metastasis	Brain	Brain	IMPACTv6-CLIN-20170454	76.1	0	385	Unknown Primary	8	NA	0	BRAF_CLASS_1_V600E	0	#N/A	#N/A	#N/A	#N/A	#N/A	#N/A	#N/A	#N/A	#N/A	#N/A	#N/A	#N/A	#N/A	#N/A	#N/A	#N/A	#N/A	#N/A	#N/A	#N/A	#N/A
P-0023765-T01-IM6	Male	Cutaneous Melanoma	Metastasis	Lung	Lung	IMPACTv6-CLIN-20170451	73	0	1093	Skin, external ear	1	No	0	NF1	0	#N/A	#N/A	#N/A	#N/A	#N/A	#N/A	#N/A	#N/A	#N/A	#N/A	#N/A	#N/A	#N/A	#N/A	#N/A	#N/A	#N/A	#N/A	#N/A	#N/A	#N/A
P-0023775-T01-IM6	Male	Cutaneous Melanoma	Metastasis	In-transit	LR / In-Transit / Regional LN	IMPACTv6-CLIN-20170452	49.1	0	3374	Skin, trunk	2	Yes	0	BRAF_CLASS_1_V600E	0	#N/A	#N/A	#N/A	#N/A	#N/A	#N/A	#N/A	#N/A	#N/A	#N/A	#N/A	#N/A	#N/A	#N/A	#N/A	#N/A	#N/A	#N/A	#N/A	#N/A	#N/A
P-0023777-T01-IM6	Male	Cutaneous Melanoma	Metastasis	Lung	Lung	IMPACTv6-CLIN-20170452	71.1	0	1302	Skin, scalp	1	Yes	0	NF1	1	Ipilimumab, Nivolumab	PD-1 Combo	0	0	32.2192	32.2192	72	0	163	0.662602	0	3.14286	0	9	9	1	0	0	1	M1c	M1c
P-0023794-T01-IM6	Female	Melanoma of Unknown Primary	Metastasis	In-transit	LR / In-Transit / Regional LN	IMPACTv6-CLIN-20170450	52.7	0	1051	Unknown Primary	8	NA	0	RAS_OTHER	1	Pembrolizumab	PD-1 Mono	0	0	30.1808	30.1808	53	0	192	0.780488	0	Unknown	Unknown	Unknown	Unknown	0	0	0	0	M1a	M1a
P-0023821-T01-IM6	Female	Cutaneous Melanoma	Metastasis	Lymph Node, Regional	LR / In-Transit / Regional LN	IMPACTv6-CLIN-20170456	55.2	0	1524	Skin, leg/hip	4	No	0	BRAF_CLASS_2_3	0	#N/A	#N/A	#N/A	#N/A	#N/A	#N/A	#N/A	#N/A	#N/A	#N/A	#N/A	#N/A	#N/A	#N/A	#N/A	#N/A	#N/A	#N/A	#N/A	#N/A	#N/A
P-0023848-T01-IM6	Male	Cutaneous Melanoma	Metastasis	Lung	Lung	IMPACTv6-CLIN-20170457	70.3	1	6312	Skin, face	1	No	0	BRAF_CLASS_2_3	1	Pembrolizumab	PD-1 Mono	1	1	1.64384	3.64932	87	1	299	1.21545	1	5	1	1	0	1	1	1	1	M1c	M1d
P-0023973-T01-IM6	Female	Cutaneous Melanoma	Metastasis	Lung	Lung	IMPACTv6-CLIN-20170466	61.5	0	1729	Skin, arm/shoulder	3	No	0	NF1	1	Pembrolizumab	PD-1 Mono	0	0	31.2	31.2	64	0	233	0.947154	0	1.63158	0	0	1	1	0	0	0	M1b	M1b
P-0023993-T01-IM6	Male	Cutaneous Melanoma	Metastasis	Lymph Node, Non-Regional	Soft Tissue / Distant LN	IMPACTv6-CLIN-20170463	63.4	0	1677	Skin, leg/hip	4	No	0	Unknown_Driver	0	#N/A	#N/A	#N/A	#N/A	#N/A	#N/A	#N/A	#N/A	#N/A	#N/A	#N/A	#N/A	#N/A	#N/A	#N/A	#N/A	#N/A	#N/A	#N/A	#N/A	#N/A
P-0024070-T01-IM6	Male	Cutaneous Melanoma	Metastasis	Lymph Node, Regional	LR / In-Transit / Regional LN	IMPACTv6-CLIN-20170470	52	1	813	Skin, trunk	2	No	0	NF1	0	#N/A	#N/A	#N/A	#N/A	#N/A	#N/A	#N/A	#N/A	#N/A	#N/A	#N/A	#N/A	#N/A	#N/A	#N/A	#N/A	#N/A	#N/A	#N/A	#N/A	#N/A
P-0024072-T01-IM6	Male	Cutaneous Melanoma	Metastasis	Lung	Lung	IMPACTv6-CLIN-20170470	62.3	0	1048	Skin, scalp	1	Yes	0	NF1	1	Ipilimumab, Nivolumab	PD-1 Combo	0	0	27.3205	27.3205	63	0	194	0.788618	0	2.86667	0	9	9	1	1	0	0	M1c	M1d
P-0024110-T01-IM6	Male	Cutaneous Melanoma	Metastasis	Lymph Node, Regional	LR / In-Transit / Regional LN	IMPACTv6-CLIN-20170477	55.8	1	891	Skin, leg/hip	4	Yes	0	BRAF_CLASS_1_V600E	1	Pembrolizumab	PD-1 Mono	1	1	2.00548	14.0055	57	1	220	0.894309	0	3.7619	0	1	1	0	1	0	0	M1c	M1d
P-0024121-T01-IM6	Male	Cutaneous Melanoma	Metastasis	Brain	Brain	IMPACTv6-CLIN-20170478	39.3	0	3008	Skin, trunk	2	No	0	NF1	1	Ipilimumab, Nivolumab	PD-1 Combo	1	0	2.89315	8.87671	47	0	Unknown	Unknown	Unknown	Unknown	Unknown	9	9	1	1	0	0	M1c	M1d
P-0024166-T02-IM6	Male	Cutaneous Melanoma	Primary	Not Applicable	NA	IMPACTv6-CLIN-20170520	81.9	0	491	Skin, arm/shoulder	3	No	0	NRAS_Q61	0	#N/A	#N/A	#N/A	#N/A	#N/A	#N/A	#N/A	#N/A	#N/A	#N/A	#N/A	#N/A	#N/A	#N/A	#N/A	#N/A	#N/A	#N/A	#N/A	#N/A	#N/A
P-0024188-T01-IM6	Male	Cutaneous Melanoma	Metastasis	Lymph Node, Regional	LR / In-Transit / Regional LN	IMPACTv6-CLIN-20170475	54.3	0	608	Skin, trunk	2	Unknown	0	NRAS_Q61	0	#N/A	#N/A	#N/A	#N/A	#N/A	#N/A	#N/A	#N/A	#N/A	#N/A	#N/A	#N/A	#N/A	#N/A	#N/A	#N/A	#N/A	#N/A	#N/A	#N/A	#N/A
P-0024221-T01-IM6	Female	Cutaneous Melanoma	Metastasis	In-transit	LR / In-Transit / Regional LN	IMPACTv6-CLIN-20170481	68	1	3983	Skin, trunk	2	Yes	0	BRAF_CLASS_1_V600E	1	Pembrolizumab	PD-1 Mono	1	1	16.9973	18.411	77	0	Unknown	Unknown	Unknown	2.3125	0	1	1	0	0	0	0	M0	M0
P-0024262-T01-IM6	Male	Cutaneous Melanoma	Metastasis	Liver	Liver	IMPACTv6-CLIN-20170483	69.6	0	6399	Skin, scalp	1	Unknown	0	NF1	1	Ipilimumab, Nivolumab	PD-1 Combo	0	0	26.9589	26.9589	85	0	233	0.947154	0	6.33333	1	9	9	0	0	0	1	M1c	M1c
P-0024301-T01-IM6	Female	Cutaneous Melanoma	Metastasis	In-transit	LR / In-Transit / Regional LN	IMPACTv6-CLIN-20170486	75.3	0	2528	Skin, leg/hip	4	No	0	Unknown_Driver	0	#N/A	#N/A	#N/A	#N/A	#N/A	#N/A	#N/A	#N/A	#N/A	#N/A	#N/A	#N/A	#N/A	#N/A	#N/A	#N/A	#N/A	#N/A	#N/A	#N/A	#N/A
P-0024305-T01-IM6	Male	Cutaneous Melanoma	Metastasis	Brain	Brain	IMPACTv6-CLIN-20170486	47.5	0	1585	Skin, arm/shoulder	3	Yes	0	BRAF_CLASS_1_Other	0	#N/A	#N/A	#N/A	#N/A	#N/A	#N/A	#N/A	#N/A	#N/A	#N/A	#N/A	#N/A	#N/A	#N/A	#N/A	#N/A	#N/A	#N/A	#N/A	#N/A	#N/A
P-0024339-T01-IM6	Female	Cutaneous Melanoma	Primary	Not Applicable	NA	IMPACTv6-CLIN-20170489	74.1	0	615	Skin, leg/hip	4	No	0	NF1	0	#N/A	#N/A	#N/A	#N/A	#N/A	#N/A	#N/A	#N/A	#N/A	#N/A	#N/A	#N/A	#N/A	#N/A	#N/A	#N/A	#N/A	#N/A	#N/A	#N/A	#N/A
P-0024344-T01-IM6	Male	Cutaneous Melanoma	Primary	Not Applicable	NA	IMPACTv6-CLIN-20170489	61.2	0	509	Skin, trunk	2	No	0	NRAS_Q61	0	#N/A	#N/A	#N/A	#N/A	#N/A	#N/A	#N/A	#N/A	#N/A	#N/A	#N/A	#N/A	#N/A	#N/A	#N/A	#N/A	#N/A	#N/A	#N/A	#N/A	#N/A
P-0024395-T01-IM6	Male	Cutaneous Melanoma	Metastasis	Lung	Lung	IMPACTv6-CLIN-20170494	76.9	0	3632	Skin, eyelid	1	No	0	Other_Driver	1	Pembrolizumab	PD-1 Mono	0	0	29.2274	29.2274	84	1	212	0.861789	0	1.5	0	1	1	1	0	0	0	M1b	M1b
P-0024536-T01-IM6	Male	Melanoma of Unknown Primary	Metastasis	Lymph Node, Non-Regional	Soft Tissue / Distant LN	IMPACTv6-CLIN-20170497	79.5	1	985	Unknown Primary	8	NA	0	NF1	1	Pembrolizumab	PD-1 Mono	1	1	2.16986	2.16986	82	1	262	1.06504	1	17.375	1	0	0	1	1	0	0	M1c	M1d
P-0024595-T01-IM6	Male	Cutaneous Melanoma	Metastasis	In-transit	LR / In-Transit / Regional LN	IMPACTv6-CLIN-20170506	53.7	1	1095	Skin, foot	4	Yes	0	NRAS_Q61	1	Pembrolizumab	PD-1 Mono	1	1	0.920548	13.7425	56	0	165	0.670732	0	1.46429	0	1	1	1	1	0	0	M1c	M1d
P-0024605-T01-IM6	Male	Cutaneous Melanoma	Metastasis	Liver	Liver	IMPACTv6-CLIN-20170505	44.9	1	5428	Skin, leg/hip	4	Unknown	0	NRAS_Q61	0	#N/A	#N/A	#N/A	#N/A	#N/A	#N/A	#N/A	#N/A	#N/A	#N/A	#N/A	#N/A	#N/A	#N/A	#N/A	#N/A	#N/A	#N/A	#N/A	#N/A	#N/A
P-0024628-T01-IM6	Male	Melanoma of Unknown Primary	Metastasis	Soft Tissue	Soft Tissue / Distant LN	IMPACTv6-CLIN-20170504	55.6	1	29	Unknown Primary	8	NA	0	RAS_OTHER	0	#N/A	#N/A	#N/A	#N/A	#N/A	#N/A	#N/A	#N/A	#N/A	#N/A	#N/A	#N/A	#N/A	#N/A	#N/A	#N/A	#N/A	#N/A	#N/A	#N/A	#N/A
P-0024639-T01-IM6	Male	Melanoma of Unknown Primary	Metastasis	Brain	Brain	IMPACTv6-CLIN-20170504	75.9	1	51	Unknown Primary	8	NA	0	Other_Driver	1	Pembrolizumab	PD-1 Mono	1	1	0.230137	0.230137	76	2	286	1.1626	1	9.2	1	1	0	0	1	0	0	M1c	M1d
P-0024769-T01-IM6	Male	Cutaneous Melanoma	Primary	Not Applicable	NA	IMPACTv6-CLIN-20170516	62.6	0	534	Skin, trunk	2	Unknown	0	NRAS_Q61	0	#N/A	#N/A	#N/A	#N/A	#N/A	#N/A	#N/A	#N/A	#N/A	#N/A	#N/A	#N/A	#N/A	#N/A	#N/A	#N/A	#N/A	#N/A	#N/A	#N/A	#N/A
P-0024771-T01-IM6	Female	Cutaneous Melanoma	Metastasis	Lung	Lung	IMPACTv6-CLIN-20170516	28.2	0	7773	Skin, trunk	2	Unknown	0	BRAF_CLASS_1_V600E	0	#N/A	#N/A	#N/A	#N/A	#N/A	#N/A	#N/A	#N/A	#N/A	#N/A	#N/A	#N/A	#N/A	#N/A	#N/A	#N/A	#N/A	#N/A	#N/A	#N/A	#N/A
P-0024830-T01-IM6	Male	Cutaneous Melanoma	Primary	Not Applicable	NA	IMPACTv6-CLIN-20170521	68.2	0	1568	Skin, scalp	1	Yes	0	BRAF_CLASS_1_Other	1	Pembrolizumab	PD-1 Mono	0	0	31.0027	31.0027	70	0	Unknown	Unknown	Unknown	2.30769	0	1	1	1	0	0	0	M1b	M1b
P-0024994-T01-IM6	Female	Cutaneous Melanoma	Metastasis	Soft Tissue	Soft Tissue / Distant LN	IMPACTv6-CLIN-20170528	19.2	1	2663	Skin, trunk	2	No	0	BRAF_CLASS_1_V600E	1	Pembrolizumab	PD-1 Mono	1	1	1.61096	18.5753	25	0	161	0.654472	0	2.66667	0	0	1	0	1	0	0	M1c	M1d
P-0024995-T01-IM6	Male	Cutaneous Melanoma	Metastasis	In-transit	LR / In-Transit / Regional LN	IMPACTv6-CLIN-20170528	71.7	0	1001	Skin, external ear	1	No	0	BRAF_CLASS_2_3	0	#N/A	#N/A	#N/A	#N/A	#N/A	#N/A	#N/A	#N/A	#N/A	#N/A	#N/A	#N/A	#N/A	#N/A	#N/A	#N/A	#N/A	#N/A	#N/A	#N/A	#N/A
P-0025093-T01-IM6	Male	Melanoma of Unknown Primary	Metastasis	Chest Wall	Soft Tissue / Distant LN	IMPACTv6-CLIN-20170532	71.1	0	892	Unknown Primary	8	NA	0	BRAF_CLASS_1_V600E	1	Ipilimumab, Nivolumab	PD-1 Combo	0	0	28.0767	28.0767	71	0	154	0.626016	0	5.71429	1	9	9	0	0	0	0	M1c	M1c
P-0025164-T01-IM6	Male	Cutaneous Melanoma	Metastasis	In-transit	LR / In-Transit / Regional LN	IMPACTv6-CLIN-20170539	64.9	0	1268	Skin, trunk	2	No	0	BRAF_CLASS_1_Other	1	Ipilimumab, Nivolumab	PD-1 Combo	0	0	31.8575	31.8575	66	1	200	0.813008	0	3.28571	0	9	9	0	0	1	1	M1c	M1c
P-0025347-T01-IM6	Male	Cutaneous Melanoma	Metastasis	Lung	Lung	IMPACTv6-CLIN-20170551	50.6	0	7575	Skin, arm/shoulder	3	Unknown	0	BRAF_CLASS_2_3	0	#N/A	#N/A	#N/A	#N/A	#N/A	#N/A	#N/A	#N/A	#N/A	#N/A	#N/A	#N/A	#N/A	#N/A	#N/A	#N/A	#N/A	#N/A	#N/A	#N/A	#N/A
P-0025530-T01-IM6	Female	Cutaneous Melanoma	Metastasis	In-transit	LR / In-Transit / Regional LN	IMPACTv6-CLIN-20170564	71.1	1	2935	Skin, leg/hip	4	Unknown	0	NRAS_Q61	0	#N/A	#N/A	#N/A	#N/A	#N/A	#N/A	#N/A	#N/A	#N/A	#N/A	#N/A	#N/A	#N/A	#N/A	#N/A	#N/A	#N/A	#N/A	#N/A	#N/A	#N/A
P-0025541-T01-IM6	Male	Cutaneous Melanoma	Primary	Not Applicable	NA	IMPACTv6-CLIN-20170559	70.9	0	1253	Skin, trunk	2	Yes	0	BRAF_CLASS_1_V600E	1	Ipilimumab, Nivolumab	PD-1 Combo	1	0	2.10411	27.6164	72	1	430	1.74797	1	7.875	1	9	9	0	1	0	0	M1c	M1d
P-0025561-T01-IM6	Male	Cutaneous Melanoma	Metastasis	Lymph Node, Regional	LR / In-Transit / Regional LN	IMPACTv6-CLIN-20170560	45.3	0	5099	Skin, trunk	2	No	1	BRAF_CLASS_2_3	0	#N/A	#N/A	#N/A	#N/A	#N/A	#N/A	#N/A	#N/A	#N/A	#N/A	#N/A	#N/A	#N/A	#N/A	#N/A	#N/A	#N/A	#N/A	#N/A	#N/A	#N/A
P-0025565-T01-IM6	Male	Cutaneous Melanoma	Metastasis	Adrenal Gland	Other Visceral	IMPACTv6-CLIN-20170560	45.2	0	1021	Skin, arm/shoulder	3	Yes	0	BRAF_CLASS_1_V600E	1	Ipilimumab, Nivolumab	PD-1 Combo	1	0	2.99178	29.5562	46	0	171	0.695122	0	3.25	0	9	9	1	0	0	0	M1c	M1c
P-0025608-T01-IM6	Male	Cutaneous Melanoma	Metastasis	Soft Tissue	Soft Tissue / Distant LN	IMPACTv6-CLIN-20170563	26.4	1	262	Skin, trunk	2	Yes	0	BRAF_CLASS_1_V600E	0	#N/A	#N/A	#N/A	#N/A	#N/A	#N/A	#N/A	#N/A	#N/A	#N/A	#N/A	#N/A	#N/A	#N/A	#N/A	#N/A	#N/A	#N/A	#N/A	#N/A	#N/A
P-0025733-T01-IM6	Male	Cutaneous Melanoma	Metastasis	Lymph Node, Regional	LR / In-Transit / Regional LN	IMPACTv6-CLIN-20170571	68.6	0	522	Skin, trunk	2	Yes	0	NRAS_Q61	0	#N/A	#N/A	#N/A	#N/A	#N/A	#N/A	#N/A	#N/A	#N/A	#N/A	#N/A	#N/A	#N/A	#N/A	#N/A	#N/A	#N/A	#N/A	#N/A	#N/A	#N/A
P-0025813-T01-IM6	Male	Cutaneous Melanoma	Metastasis	Lymph Node, Regional	LR / In-Transit / Regional LN	IMPACTv6-CLIN-20170580	61.1	0	2423	Skin, leg/hip	4	No	0	Other_Driver	0	#N/A	#N/A	#N/A	#N/A	#N/A	#N/A	#N/A	#N/A	#N/A	#N/A	#N/A	#N/A	#N/A	#N/A	#N/A	#N/A	#N/A	#N/A	#N/A	#N/A	#N/A
P-0025831-T01-IM6	Female	Cutaneous Melanoma	Metastasis	Lymph Node, Regional	LR / In-Transit / Regional LN	IMPACTv6-CLIN-20170576	60.3	0	375	Skin, neck	1	No	0	NRAS_Q61	0	#N/A	#N/A	#N/A	#N/A	#N/A	#N/A	#N/A	#N/A	#N/A	#N/A	#N/A	#N/A	#N/A	#N/A	#N/A	#N/A	#N/A	#N/A	#N/A	#N/A	#N/A
P-0025853-T01-IM6	Male	Melanoma of Unknown Primary	Metastasis	Lung	Lung	IMPACTv6-CLIN-20170578	60.9	0	1157	Unknown Primary	8	NA	0	BRAF_CLASS_1_V600E	1	Pembrolizumab	PD-1 Mono	1	0	3.02466	31.7918	61	0	Unknown	Unknown	Unknown	1.25926	0	1	1	1	0	0	0	M1b	M1b
P-0025878-T01-IM6	Male	Cutaneous Melanoma	Metastasis	In-transit	LR / In-Transit / Regional LN	IMPACTv6-CLIN-20170579	76.8	1	430	Skin, trunk	2	Yes	0	NRAS_Q61	1	Pembrolizumab	PD-1 Mono	1	1	1.31507	1.31507	78	1	214	0.869919	0	3.27273	0	1	1	0	0	0	0	M0	M0
P-0025907-N01-IM6	Male	Cutaneous Melanoma	Metastasis	Epidural	Other Visceral	IMPACTv6-CLIN-20170594	50	1	6056	Skin, trunk	2	Unknown	0	BRAF_CLASS_1_V600E	0	#N/A	#N/A	#N/A	#N/A	#N/A	#N/A	#N/A	#N/A	#N/A	#N/A	#N/A	#N/A	#N/A	#N/A	#N/A	#N/A	#N/A	#N/A	#N/A	#N/A	#N/A
P-0025945-T01-IM6	Male	Cutaneous Melanoma	Metastasis	In-transit	LR / In-Transit / Regional LN	IMPACTv6-CLIN-20170588	90.9	0	874	Skin, face	1	Yes	0	NF1	1	Pembrolizumab	PD-1 Mono	1	0	21.9945	27.8795	91	1	213	0.865854	0	1.51724	0	0	1	1	0	0	0	M1b	M1b
P-0025973-T01-IM6	Male	Cutaneous Melanoma	Primary	Not Applicable	NA	IMPACTv6-CLIN-20170586	61.7	0	419	Skin, neck	1	No	0	NF1	0	#N/A	#N/A	#N/A	#N/A	#N/A	#N/A	#N/A	#N/A	#N/A	#N/A	#N/A	#N/A	#N/A	#N/A	#N/A	#N/A	#N/A	#N/A	#N/A	#N/A	#N/A
P-0026008-T01-IM6	Female	Cutaneous Melanoma	Metastasis	Liver	Liver	IMPACTv6-CLIN-20170590	41.2	0	1599	Skin, arm/shoulder	3	No	0	NF1	1	Ipilimumab, Nivolumab	PD-1 Combo	0	0	30.4767	30.4767	43	0	Unknown	Unknown	Unknown	3.94444	0	9	9	0	0	0	1	M1c	M1c
P-0026015-T01-IM6	Male	Cutaneous Melanoma	Metastasis	In-transit	LR / In-Transit / Regional LN	IMPACTv6-CLIN-20170587	45.7	1	1374	Skin, leg/hip	4	No	0	NRAS_Q61	1	Pembrolizumab	PD-1 Mono	1	1	3.15616	26.2356	47	0	170	0.691057	0	2.33333	0	1	1	0	0	0	0	M0	M0
P-0026030-T01-IM6	Female	Cutaneous Melanoma	Metastasis	Lymph Node, Non-Regional	Soft Tissue / Distant LN	IMPACTv6-CLIN-20170593	54.6	0	2748	Skin, trunk	2	No	0	NF1	1	Ipilimumab, Nivolumab	PD-1 Combo	1	0	0.591781	27.7479	60	1	Unknown	Unknown	Unknown	3	0	9	9	0	1	0	0	M1c	M1d
P-0026151-T01-IM6	Male	Cutaneous Melanoma	Metastasis	Lymph Node, Regional	LR / In-Transit / Regional LN	IMPACTv6-CLIN-20170598	54.6	0	567	Skin, leg/hip	4	Yes	1	BRAF_CLASS_2_3	1	Nivolumab	PD-1 Mono	1	0	1.74247	12.1315	55	0	158	0.642276	0	1.47059	0	0	1	1	0	0	0	M1b	M1b
P-0026158-T01-IM6	Male	Melanoma of Unknown Primary	Metastasis	Lymph Node, Non-Regional	Soft Tissue / Distant LN	IMPACTv6-CLIN-20170598	39.2	0	570	Unknown Primary	8	NA	0	BRAF_CLASS_2_3	0	#N/A	#N/A	#N/A	#N/A	#N/A	#N/A	#N/A	#N/A	#N/A	#N/A	#N/A	#N/A	#N/A	#N/A	#N/A	#N/A	#N/A	#N/A	#N/A	#N/A	#N/A
P-0026274-T02-IM6	Male	Cutaneous Melanoma	Metastasis	Lymph Node, Regional	LR / In-Transit / Regional LN	IMPACTv6-CLIN-20180004R	84.9	0	1226	Skin, leg/hip	4	No	0	KIT_PDGFRA	1	Pembrolizumab	PD-1 Mono	0	0	28.3068	28.3068	86	1	164	0.656	0	3.35294	0	1	1	1	0	0	0	M1c	M1c
P-0026314-T01-IM6	Female	Cutaneous Melanoma	Primary	Not Applicable	NA	IMPACTv6-CLIN-20180003	61.1	0	530	Skin, trunk	2	No	0	NRAS_Q61	0	#N/A	#N/A	#N/A	#N/A	#N/A	#N/A	#N/A	#N/A	#N/A	#N/A	#N/A	#N/A	#N/A	#N/A	#N/A	#N/A	#N/A	#N/A	#N/A	#N/A	#N/A
P-0026326-T01-IM6	Male	Cutaneous Melanoma	Metastasis	Lymph Node, Non-Regional	Soft Tissue / Distant LN	IMPACTv6-CLIN-20180014	71.8	0	1602	Skin, leg/hip	4	Yes	0	NRAS_Q61	0	#N/A	#N/A	#N/A	#N/A	#N/A	#N/A	#N/A	#N/A	#N/A	#N/A	#N/A	#N/A	#N/A	#N/A	#N/A	#N/A	#N/A	#N/A	#N/A	#N/A	#N/A
P-0026354-T01-IM6	Male	Melanoma of Unknown Primary	Metastasis	Brain	Brain	IMPACTv6-CLIN-20180013	56.8	1	82	Unknown Primary	8	NA	0	NF1	0	#N/A	#N/A	#N/A	#N/A	#N/A	#N/A	#N/A	#N/A	#N/A	#N/A	#N/A	#N/A	#N/A	#N/A	#N/A	#N/A	#N/A	#N/A	#N/A	#N/A	#N/A
P-0026361-T01-IM6	Female	Cutaneous Melanoma	Metastasis	Not Applicable	Soft Tissue / Distant LN	IMPACTv6-CLIN-20180015	43.1	0	8834	Skin, face	1	No	0	BRAF_CLASS_1_V600E	1	Nivolumab	PD-1 Mono	1	0	12.5918	27.5507	65	0	158	0.632	0	2	0	1	1	0	0	0	0	M1a	M1a
P-0026488-T02-IM6	Male	Cutaneous Melanoma	Metastasis	Soft Tissue	Soft Tissue / Distant LN	IMPACTv6-CLIN-20180023R	68.4	0	1752	Skin, trunk	2	No	0	Other_Driver	0	#N/A	#N/A	#N/A	#N/A	#N/A	#N/A	#N/A	#N/A	#N/A	#N/A	#N/A	#N/A	#N/A	#N/A	#N/A	#N/A	#N/A	#N/A	#N/A	#N/A	#N/A
P-0026715-T01-IM6	Female	Cutaneous Melanoma	Primary	Not Applicable	NA	IMPACTv6-CLIN-20180033R	40.4	0	567	Skin, trunk	2	No	0	BRAF_CLASS_1_V600E	0	#N/A	#N/A	#N/A	#N/A	#N/A	#N/A	#N/A	#N/A	#N/A	#N/A	#N/A	#N/A	#N/A	#N/A	#N/A	#N/A	#N/A	#N/A	#N/A	#N/A	#N/A
P-0026789-T01-IM6	Male	Cutaneous Melanoma	Metastasis	Lung	Lung	IMPACTv6-CLIN-20180040	54.8	0	1583	Skin, arm/shoulder	3	Yes	0	NRAS_Q61	0	#N/A	#N/A	#N/A	#N/A	#N/A	#N/A	#N/A	#N/A	#N/A	#N/A	#N/A	#N/A	#N/A	#N/A	#N/A	#N/A	#N/A	#N/A	#N/A	#N/A	#N/A
P-0026835-T01-IM6	Male	Melanoma of Unknown Primary	Metastasis	Lymph Node, Regional	LR / In-Transit / Regional LN	IMPACTv6-CLIN-20180041R2	58.3	0	490	Unknown Primary	8	NA	0	NRAS_Q61	0	#N/A	#N/A	#N/A	#N/A	#N/A	#N/A	#N/A	#N/A	#N/A	#N/A	#N/A	#N/A	#N/A	#N/A	#N/A	#N/A	#N/A	#N/A	#N/A	#N/A	#N/A
P-0027076-T01-IM6	Female	Cutaneous Melanoma	Metastasis	Brain	Brain	IMPACTv6-CLIN-20180056	51.4	0	903	Skin, leg/hip	4	Yes	0	BRAF_CLASS_1_V600E	0	#N/A	#N/A	#N/A	#N/A	#N/A	#N/A	#N/A	#N/A	#N/A	#N/A	#N/A	#N/A	#N/A	#N/A	#N/A	#N/A	#N/A	#N/A	#N/A	#N/A	#N/A
P-0027084-T01-IM6	Male	Cutaneous Melanoma	Metastasis	Lymph Node, Regional	LR / In-Transit / Regional LN	IMPACTv6-CLIN-20180055	43.3	0	481	Skin, leg/hip	4	No	0	BRAF_CLASS_1_V600E	0	#N/A	#N/A	#N/A	#N/A	#N/A	#N/A	#N/A	#N/A	#N/A	#N/A	#N/A	#N/A	#N/A	#N/A	#N/A	#N/A	#N/A	#N/A	#N/A	#N/A	#N/A
P-0027104-T01-IM6	Male	Cutaneous Melanoma	Metastasis	Lymph Node, Regional	LR / In-Transit / Regional LN	IMPACTv6-CLIN-20180057	74.5	1	1821	Skin, arm/shoulder	3	Unknown	0	NRAS_Q61	1	Ipilimumab, Nivolumab	PD-1 Combo	1	1	4.17534	13.874	78	0	189	0.756	0	1.69231	0	9	9	1	1	0	0	M1c	M1d
P-0027154-T01-IM6	Female	Melanoma of Unknown Primary	Metastasis	Lymph Node, Regional	LR / In-Transit / Regional LN	IMPACTv6-CLIN-20180059	61.2	0	450	Unknown Primary	8	NA	0	BRAF_CLASS_1_Other	0	#N/A	#N/A	#N/A	#N/A	#N/A	#N/A	#N/A	#N/A	#N/A	#N/A	#N/A	#N/A	#N/A	#N/A	#N/A	#N/A	#N/A	#N/A	#N/A	#N/A	#N/A
P-0027227-T01-IM6	Female	Cutaneous Melanoma	Primary	Not Applicable	NA	IMPACTv6-CLIN-20180064	23.1	0	1835	Skin, leg/hip	4	No	0	BRAF_CLASS_1_V600E	0	#N/A	#N/A	#N/A	#N/A	#N/A	#N/A	#N/A	#N/A	#N/A	#N/A	#N/A	#N/A	#N/A	#N/A	#N/A	#N/A	#N/A	#N/A	#N/A	#N/A	#N/A
P-0027270-T01-IM6	Male	Cutaneous Melanoma	Metastasis	Lymph Node, Regional	LR / In-Transit / Regional LN	IMPACTv6-CLIN-20180067	74.5	0	690	Skin, external ear	1	No	0	BRAF_CLASS_2_3	0	#N/A	#N/A	#N/A	#N/A	#N/A	#N/A	#N/A	#N/A	#N/A	#N/A	#N/A	#N/A	#N/A	#N/A	#N/A	#N/A	#N/A	#N/A	#N/A	#N/A	#N/A
P-0027338-T01-IM6	Male	Melanoma of Unknown Primary	Metastasis	In-transit	LR / In-Transit / Regional LN	IMPACTv6-CLIN-20180073	62.2	0	969	Unknown Primary	8	NA	0	NF1	1	Pembrolizumab	PD-1 Mono	0	0	27.1562	27.1562	63	0	215	0.86	0	3.52941	0	1	1	0	0	1	0	M1c	M1c
P-0027588-T01-IM6	Male	Cutaneous Melanoma	Metastasis	Soft Tissue	Soft Tissue / Distant LN	IMPACTv6-CLIN-20180090	57.5	0	1006	Skin, trunk	2	Yes	0	Unknown_Driver	0	#N/A	#N/A	#N/A	#N/A	#N/A	#N/A	#N/A	#N/A	#N/A	#N/A	#N/A	#N/A	#N/A	#N/A	#N/A	#N/A	#N/A	#N/A	#N/A	#N/A	#N/A
P-0027603-T01-IM6	Female	Melanoma of Unknown Primary	Metastasis	Brain	Brain	IMPACTv6-CLIN-20180088	44.2	0	868	Unknown Primary	8	NA	0	NRAS_Q61	1	Ipilimumab, Nivolumab	PD-1 Combo	1	0	3.64932	27.4192	44	1	113	0.452	0	1.45455	0	9	9	0	1	0	0	M1c	M1d
P-0027626-T01-IM6	Male	Melanoma of Unknown Primary	Metastasis	Lymph Node, Regional	LR / In-Transit / Regional LN	IMPACTv6-CLIN-20180089	53.1	0	478	Unknown Primary	8	NA	0	NRAS_Q61	0	#N/A	#N/A	#N/A	#N/A	#N/A	#N/A	#N/A	#N/A	#N/A	#N/A	#N/A	#N/A	#N/A	#N/A	#N/A	#N/A	#N/A	#N/A	#N/A	#N/A	#N/A
P-0027707-T01-IM6	Male	Cutaneous Melanoma	Metastasis	Lymph Node, Regional	LR / In-Transit / Regional LN	IMPACTv6-CLIN-20180092	72	0	308	Skin, arm/shoulder	3	No	0	NF1	0	#N/A	#N/A	#N/A	#N/A	#N/A	#N/A	#N/A	#N/A	#N/A	#N/A	#N/A	#N/A	#N/A	#N/A	#N/A	#N/A	#N/A	#N/A	#N/A	#N/A	#N/A
P-0027716-T01-IM6	Male	Cutaneous Melanoma	Metastasis	Soft Tissue	Soft Tissue / Distant LN	IMPACTv6-CLIN-20180092	63.9	0	1984	Skin, arm/shoulder	3	No	0	BRAF_CLASS_1_Other	0	#N/A	#N/A	#N/A	#N/A	#N/A	#N/A	#N/A	#N/A	#N/A	#N/A	#N/A	#N/A	#N/A	#N/A	#N/A	#N/A	#N/A	#N/A	#N/A	#N/A	#N/A
P-0027739-T01-IM6	Male	Cutaneous Melanoma	Primary	Not Applicable	NA	IMPACTv6-CLIN-20180097	53.6	0	407	Skin, arm/shoulder	3	Yes	0	BRAF_CLASS_1_V600E	0	#N/A	#N/A	#N/A	#N/A	#N/A	#N/A	#N/A	#N/A	#N/A	#N/A	#N/A	#N/A	#N/A	#N/A	#N/A	#N/A	#N/A	#N/A	#N/A	#N/A	#N/A
P-0027752-T01-IM6	Male	Cutaneous Melanoma	Primary	Not Applicable	NA	IMPACTv6-CLIN-20180098	51.8	1	405	Skin, scalp	1	Yes	0	NF1	1	Ipilimumab, Nivolumab	PD-1 Combo	1	1	0.723288	0.723288	53	1	Unknown	Unknown	Unknown	46	1	9	9	1	0	1	1	M1c	M1c
P-0027768-T01-IM6	Male	Cutaneous Melanoma	Metastasis	Liver	Liver	IMPACTv6-CLIN-20180099	61.7	1	3397	Skin, trunk	2	No	0	BRAF_CLASS_1_Other	1	Ipilimumab, Nivolumab	PD-1 Combo	1	1	2.13699	2.13699	71	1	328	1.33333	1	5.45455	1	9	9	1	0	1	1	M1c	M1c
P-0027808-T01-IM6	Male	Cutaneous Melanoma	Primary	Not Applicable	NA	IMPACTv6-CLIN-20180103	49.7	1	1061	Skin, trunk	2	Yes	0	NRAS_Q61	0	#N/A	#N/A	#N/A	#N/A	#N/A	#N/A	#N/A	#N/A	#N/A	#N/A	#N/A	#N/A	#N/A	#N/A	#N/A	#N/A	#N/A	#N/A	#N/A	#N/A	#N/A
P-0027875-T01-IM6	Male	Cutaneous Melanoma	Metastasis	Lymph Node, Regional	LR / In-Transit / Regional LN	IMPACTv6-CLIN-20180100	61.5	1	381	Skin, leg/hip	4	Unknown	0	NRAS_Q61	1	Nivolumab	PD-1 Mono	1	1	3.84658	9.76438	62	0	Unknown	Unknown	Unknown	2.72727	0	1	1	0	0	0	1	M1c	M1c
P-0028040-T01-IM6	Male	Cutaneous Melanoma	Primary	Not Applicable	NA	IMPACTv6-CLIN-20180108	58.9	0	539	Skin, arm/shoulder	3	No	0	BRAF_CLASS_1_V600E	0	#N/A	#N/A	#N/A	#N/A	#N/A	#N/A	#N/A	#N/A	#N/A	#N/A	#N/A	#N/A	#N/A	#N/A	#N/A	#N/A	#N/A	#N/A	#N/A	#N/A	#N/A
P-0028041-T01-IM6	Male	Cutaneous Melanoma	Primary	Not Applicable	NA	IMPACTv6-CLIN-20180108	53.2	0	671	Skin, leg/hip	4	Yes	0	BRAF_CLASS_1_V600E	0	#N/A	#N/A	#N/A	#N/A	#N/A	#N/A	#N/A	#N/A	#N/A	#N/A	#N/A	#N/A	#N/A	#N/A	#N/A	#N/A	#N/A	#N/A	#N/A	#N/A	#N/A
P-0028067-T01-IM6	Female	Cutaneous Melanoma	Metastasis	In-transit	LR / In-Transit / Regional LN	IMPACTv6-CLIN-20180113	65.4	0	1273	Skin, trunk	2	Yes	0	BRAF_CLASS_1_Other	1	Pembrolizumab	PD-1 Mono	1	0	8.05479	26.9589	67	0	189	0.756	0	1.11111	0	0	1	1	1	0	0	M1c	M1d
P-0028078-T01-IM6	Female	Cutaneous Melanoma	Metastasis	Lung	Lung	IMPACTv6-CLIN-20180115	79.4	1	2771	Skin, arm/shoulder	3	Unknown	0	NRAS_Q61	1	Pembrolizumab	PD-1 Mono	1	1	2.9589	10.7507	86	2	370	1.48	1	3.38095	0	1	1	1	0	1	0	M1c	M1c
P-0028101-T01-IM6	Male	Melanoma of Unknown Primary	Metastasis	Liver	Liver	IMPACTv6-CLIN-20180112	66	0	547	Unknown Primary	8	NA	0	NF1	0	#N/A	#N/A	#N/A	#N/A	#N/A	#N/A	#N/A	#N/A	#N/A	#N/A	#N/A	#N/A	#N/A	#N/A	#N/A	#N/A	#N/A	#N/A	#N/A	#N/A	#N/A
P-0028205-T01-IM6	Male	Cutaneous Melanoma	Metastasis	Lymph Node, Regional	LR / In-Transit / Regional LN	IMPACTv6-CLIN-20180123	78.9	0	735	Skin, external ear	1	Yes	0	NRAS_Q61	1	Pembrolizumab	PD-1 Mono	0	0	23.474	23.474	79	0	189	0.756	0	3.91667	0	1	1	0	0	0	1	M1c	M1c
P-0028316-T01-IM6	Female	Cutaneous Melanoma	Metastasis	Small Bowel	Other Visceral	IMPACTv6-CLIN-20180126	54.6	0	701	Skin, trunk	2	No	0	NRAS_Q61	0	#N/A	#N/A	#N/A	#N/A	#N/A	#N/A	#N/A	#N/A	#N/A	#N/A	#N/A	#N/A	#N/A	#N/A	#N/A	#N/A	#N/A	#N/A	#N/A	#N/A	#N/A
P-0028477-T01-IM6	Male	Cutaneous Melanoma	Metastasis	Lymph Node, Regional	LR / In-Transit / Regional LN	IMPACTv6-CLIN-20180141	64.8	1	2003	Skin, face	1	Yes	0	NF1	0	#N/A	#N/A	#N/A	#N/A	#N/A	#N/A	#N/A	#N/A	#N/A	#N/A	#N/A	#N/A	#N/A	#N/A	#N/A	#N/A	#N/A	#N/A	#N/A	#N/A	#N/A
P-0028629-T01-IM6	Male	Cutaneous Melanoma	Metastasis	Lung	Lung	IMPACTv6-CLIN-20180149	76.7	0	1439	Skin, external ear	1	No	0	NF1	1	Nivolumab	PD-1 Mono	0	0	24.9863	24.9863	79	0	156	0.624	0	4.125	0	1	0	1	0	0	0	M1b	M1b
P-0028631-T01-IM6	Female	Melanoma of Unknown Primary	Metastasis	Sacral Mass	Bone	IMPACTv6-CLIN-20180149	66	1	331	Unknown Primary	8	NA	0	NF1	1	Pembrolizumab	PD-1 Mono	1	1	5.12877	10.2575	66	0	Unknown	Unknown	Unknown	Unknown	Unknown	Unknown	Unknown	0	0	1	1	M1c	M1c
P-0028681-T01-IM6	Male	Cutaneous Melanoma	Metastasis	Lymph Node, Non-Regional	Soft Tissue / Distant LN	IMPACTv6-CLIN-20180153	45.3	0	5137	Skin, arm/shoulder	3	Unknown	0	NF1	1	Ipilimumab, Nivolumab	PD-1 Combo	0	0	24.1644	24.1644	57	1	628	2.512	1	2.52632	0	9	9	1	0	0	1	M1c	M1c
P-0028849-T02-IM6	Male	Cutaneous Melanoma	Metastasis	In-transit	LR / In-Transit / Regional LN	IMPACTv6-CLIN-20180201	54.3	0	2623	Skin, arm/shoulder	3	Unknown	0	BRAF_CLASS_1_V600E	0	#N/A	#N/A	#N/A	#N/A	#N/A	#N/A	#N/A	#N/A	#N/A	#N/A	#N/A	#N/A	#N/A	#N/A	#N/A	#N/A	#N/A	#N/A	#N/A	#N/A	#N/A
P-0028910-T01-IM6	Male	Cutaneous Melanoma	Metastasis	Lymph Node, Regional	LR / In-Transit / Regional LN	IMPACTv6-CLIN-20180172	65.4	0	1207	Skin, scalp	1	No	0	NRAS_Q61	0	#N/A	#N/A	#N/A	#N/A	#N/A	#N/A	#N/A	#N/A	#N/A	#N/A	#N/A	#N/A	#N/A	#N/A	#N/A	#N/A	#N/A	#N/A	#N/A	#N/A	#N/A
P-0028920-T01-IM6	Male	Melanoma of Unknown Primary	Metastasis	Lymph Node, Regional	LR / In-Transit / Regional LN	IMPACTv6-CLIN-20180167R	58.5	0	1316	Unknown Primary	8	NA	0	BRAF_CLASS_1_V600E	1	Nivolumab	PD-1 Mono	1	0	1.8411	26.2685	60	0	121	0.484	0	4.4	0	0	0	0	0	0	0	M1c	M1c
P-0028988-T01-IM6	Male	Melanoma of Unknown Primary	Metastasis	Lymph Node, Regional	LR / In-Transit / Regional LN	IMPACTv6-CLIN-20180174	55.5	1	285	Unknown Primary	8	NA	0	NRAS_Q61	1	Ipilimumab, Nivolumab	PD-1 Combo	1	1	6.27945	7.98904	56	0	188	0.752	0	2.73684	0	9	9	1	1	0	0	M1c	M1d
P-0028993-T01-IM6	Male	Melanoma of Unknown Primary	Metastasis	Lymph Node, Regional	LR / In-Transit / Regional LN	IMPACTv6-CLIN-20180174	79.8	1	218	Unknown Primary	8	NA	0	NRAS_Q61	1	Nivolumab	PD-1 Mono	1	1	3.68219	3.68219	80	1	174	0.696	0	2.76923	0	1	1	1	0	0	0	M1b	M1b
P-0029242-T01-IM6	Female	Cutaneous Melanoma	Metastasis	In-transit	LR / In-Transit / Regional LN	IMPACTv6-CLIN-20180187	57.7	0	2236	Skin, trunk	2	Unknown	0	NRAS_Q61	0	#N/A	#N/A	#N/A	#N/A	#N/A	#N/A	#N/A	#N/A	#N/A	#N/A	#N/A	#N/A	#N/A	#N/A	#N/A	#N/A	#N/A	#N/A	#N/A	#N/A	#N/A
P-0029387-T01-IM6	Male	Melanoma of Unknown Primary	Metastasis	Brain	Brain	IMPACTv6-CLIN-20180197	72.2	0	816	Unknown Primary	8	NA	0	NF1	1	Pembrolizumab	PD-1 Mono	1	0	0.558904	25.7753	72	1	200	0.8	0	3.5	0	1	1	1	1	0	0	M1c	M1d
P-0029475-T01-IM6	Female	Cutaneous Melanoma	Metastasis	Lymph Node, Regional	LR / In-Transit / Regional LN	IMPACTv6-CLIN-20180202	60.7	0	3137	Skin, face	1	No	0	BRAF_CLASS_1_Other	0	#N/A	#N/A	#N/A	#N/A	#N/A	#N/A	#N/A	#N/A	#N/A	#N/A	#N/A	#N/A	#N/A	#N/A	#N/A	#N/A	#N/A	#N/A	#N/A	#N/A	#N/A
P-0029504-T01-IM6	Male	Cutaneous Melanoma	Metastasis	In-transit	LR / In-Transit / Regional LN	IMPACTv6-CLIN-20180205	93.3	0	263	Skin, scalp	1	No	0	NF1	0	#N/A	#N/A	#N/A	#N/A	#N/A	#N/A	#N/A	#N/A	#N/A	#N/A	#N/A	#N/A	#N/A	#N/A	#N/A	#N/A	#N/A	#N/A	#N/A	#N/A	#N/A
P-0029544-T01-IM6	Male	Cutaneous Melanoma	Primary	Not Applicable	NA	IMPACTv6-CLIN-20180206	68.1	0	326	Skin, trunk	2	Yes	0	Other_Driver	0	#N/A	#N/A	#N/A	#N/A	#N/A	#N/A	#N/A	#N/A	#N/A	#N/A	#N/A	#N/A	#N/A	#N/A	#N/A	#N/A	#N/A	#N/A	#N/A	#N/A	#N/A
P-0029614-T01-IM6	Male	Cutaneous Melanoma	Metastasis	Brain	Brain	IMPACTv6-CLIN-20180210	59.2	1	1441	Skin, neck	1	No	1	BRAF_CLASS_2_3	0	#N/A	#N/A	#N/A	#N/A	#N/A	#N/A	#N/A	#N/A	#N/A	#N/A	#N/A	#N/A	#N/A	#N/A	#N/A	#N/A	#N/A	#N/A	#N/A	#N/A	#N/A
P-0029764-T01-IM6	Male	Cutaneous Melanoma	Metastasis	Lymph Node, Regional	LR / In-Transit / Regional LN	IMPACTv6-CLIN-20180222	73.8	0	1059	Skin, arm/shoulder	3	Yes	0	NF1	1	Pembrolizumab	PD-1 Mono	0	0	27.6164	27.6164	74	0	Unknown	Unknown	Unknown	8.8	1	1	0	0	0	0	0	M0	M0
P-0029804-T01-IM6	Male	Cutaneous Melanoma	Metastasis	In-transit	LR / In-Transit / Regional LN	IMPACTv6-CLIN-20180226	85.2	1	394	Skin, foot	4	Yes	0	BRAF_CLASS_1_V600E	1	Nivolumab	PD-1 Mono	1	1	2.07123	4.53699	86	2	Unknown	Unknown	Unknown	5.35714	1	1	0	0	0	0	0	M0	M0
P-0029808-T01-IM6	Male	Cutaneous Melanoma	Primary	Not Applicable	NA	IMPACTv6-CLIN-20180226	39.2	0	350	Skin, trunk	2	No	0	BRAF_CLASS_1_V600E	0	#N/A	#N/A	#N/A	#N/A	#N/A	#N/A	#N/A	#N/A	#N/A	#N/A	#N/A	#N/A	#N/A	#N/A	#N/A	#N/A	#N/A	#N/A	#N/A	#N/A	#N/A
P-0029950-T01-IM6	Male	Melanoma of Unknown Primary	Metastasis	In-transit	LR / In-Transit / Regional LN	IMPACTv6-CLIN-20180229	61.8	0	229	Unknown Primary	8	NA	0	NRAS_Q61	0	#N/A	#N/A	#N/A	#N/A	#N/A	#N/A	#N/A	#N/A	#N/A	#N/A	#N/A	#N/A	#N/A	#N/A	#N/A	#N/A	#N/A	#N/A	#N/A	#N/A	#N/A
P-0029989-T01-IM6	Male	Cutaneous Melanoma	Metastasis	Lymph Node, Regional	LR / In-Transit / Regional LN	IMPACTv6-CLIN-20180236	59.9	0	7955	Skin, arm/shoulder	3	Unknown	0	RAS_OTHER	0	#N/A	#N/A	#N/A	#N/A	#N/A	#N/A	#N/A	#N/A	#N/A	#N/A	#N/A	#N/A	#N/A	#N/A	#N/A	#N/A	#N/A	#N/A	#N/A	#N/A	#N/A
P-0030135-T01-IM6	Female	Cutaneous Melanoma	Primary	Not Applicable	NA	IMPACTv6-CLIN-20180241	47.5	0	769	Skin, neck	1	No	0	BRAF_CLASS_1_V600E	0	#N/A	#N/A	#N/A	#N/A	#N/A	#N/A	#N/A	#N/A	#N/A	#N/A	#N/A	#N/A	#N/A	#N/A	#N/A	#N/A	#N/A	#N/A	#N/A	#N/A	#N/A
P-0030209-T01-IM6	Male	Cutaneous Melanoma	Metastasis	Lymph Node, Non-Regional	Soft Tissue / Distant LN	IMPACTv6-CLIN-20180247	62.2	0	5278	Skin, trunk	2	Yes	0	NF1	1	Ipilimumab, Nivolumab	PD-1 Combo	1	0	22.3233	25.0849	75	1	Unknown	Unknown	Unknown	6.125	1	9	9	1	1	1	0	M1c	M1d
P-0030237-T01-IM6	Female	Cutaneous Melanoma	Metastasis	Lymph Node, Regional	LR / In-Transit / Regional LN	IMPACTv6-CLIN-20180251	51.2	0	1168	Skin, trunk	2	No	0	BRAF_CLASS_2_3	0	#N/A	#N/A	#N/A	#N/A	#N/A	#N/A	#N/A	#N/A	#N/A	#N/A	#N/A	#N/A	#N/A	#N/A	#N/A	#N/A	#N/A	#N/A	#N/A	#N/A	#N/A
P-0030248-T01-IM6	Male	Cutaneous Melanoma	Metastasis	In-transit	LR / In-Transit / Regional LN	IMPACTv6-CLIN-20180249	58.5	0	1321	Skin, trunk	2	No	0	NRAS_Q61	0	#N/A	#N/A	#N/A	#N/A	#N/A	#N/A	#N/A	#N/A	#N/A	#N/A	#N/A	#N/A	#N/A	#N/A	#N/A	#N/A	#N/A	#N/A	#N/A	#N/A	#N/A
P-0030290-T01-IM6	Male	Cutaneous Melanoma	Primary	Not Applicable	NA	IMPACTv6-CLIN-20180255	73.6	0	385	Skin, face	1	Unknown	0	NF1	0	#N/A	#N/A	#N/A	#N/A	#N/A	#N/A	#N/A	#N/A	#N/A	#N/A	#N/A	#N/A	#N/A	#N/A	#N/A	#N/A	#N/A	#N/A	#N/A	#N/A	#N/A
P-0030388-T01-IM6	Female	Melanoma of Unknown Primary	Metastasis	Lymph Node, Regional	LR / In-Transit / Regional LN	IMPACTv6-CLIN-20180259	66.4	0	1981	Unknown Primary	8	NA	0	NRAS_Q61	0	#N/A	#N/A	#N/A	#N/A	#N/A	#N/A	#N/A	#N/A	#N/A	#N/A	#N/A	#N/A	#N/A	#N/A	#N/A	#N/A	#N/A	#N/A	#N/A	#N/A	#N/A
P-0030475-T01-IM6	Male	Melanoma of Unknown Primary	Metastasis	Lymph Node, Regional	LR / In-Transit / Regional LN	IMPACTv6-CLIN-20180265	94.8	0	454	Unknown Primary	8	NA	0	Other_Driver	0	#N/A	#N/A	#N/A	#N/A	#N/A	#N/A	#N/A	#N/A	#N/A	#N/A	#N/A	#N/A	#N/A	#N/A	#N/A	#N/A	#N/A	#N/A	#N/A	#N/A	#N/A
P-0030546-T01-IM6	Female	Cutaneous Melanoma	Metastasis	Lymph Node, Regional	LR / In-Transit / Regional LN	IMPACTv6-CLIN-20180269	47.1	0	875	Skin, face	1	No	0	NF1	0	#N/A	#N/A	#N/A	#N/A	#N/A	#N/A	#N/A	#N/A	#N/A	#N/A	#N/A	#N/A	#N/A	#N/A	#N/A	#N/A	#N/A	#N/A	#N/A	#N/A	#N/A
P-0030804-T01-IM6	Female	Cutaneous Melanoma	Metastasis	In-transit	LR / In-Transit / Regional LN	IMPACTv6-CLIN-20180285	55.5	1	1536	Skin, arm/shoulder	3	No	0	BRAF_CLASS_1_V600E	1	Ipilimumab, Nivolumab	PD-1 Combo	1	1	2.56438	12.8219	59	0	Unknown	Unknown	Unknown	2.92308	0	9	9	1	1	0	1	M1c	M1d
P-0030816-T01-IM6	Female	Cutaneous Melanoma	Primary	Not Applicable	NA	IMPACTv6-CLIN-20180287	28.8	0	404	Skin, scalp	1	No	0	BRAF_CLASS_1_V600E	0	#N/A	#N/A	#N/A	#N/A	#N/A	#N/A	#N/A	#N/A	#N/A	#N/A	#N/A	#N/A	#N/A	#N/A	#N/A	#N/A	#N/A	#N/A	#N/A	#N/A	#N/A
P-0030878-T01-IM6	Male	Cutaneous Melanoma	Metastasis	Soft Tissue	Soft Tissue / Distant LN	IMPACTv6-CLIN-20180291	61.9	1	4777	Skin, arm/shoulder	3	Unknown	0	NRAS_Q61	0	#N/A	#N/A	#N/A	#N/A	#N/A	#N/A	#N/A	#N/A	#N/A	#N/A	#N/A	#N/A	#N/A	#N/A	#N/A	#N/A	#N/A	#N/A	#N/A	#N/A	#N/A
P-0030903-T01-IM6	Female	Melanoma of Unknown Primary	Metastasis	Soft Tissue	LR / In-Transit / Regional LN	IMPACTv6-CLIN-20180292	75.8	0	309	Unknown Primary	8	NA	0	NRAS_Q61	0	#N/A	#N/A	#N/A	#N/A	#N/A	#N/A	#N/A	#N/A	#N/A	#N/A	#N/A	#N/A	#N/A	#N/A	#N/A	#N/A	#N/A	#N/A	#N/A	#N/A	#N/A
P-0030939-T01-IM6	Female	Cutaneous Melanoma	Local Recurrence	In-transit	LR / In-Transit / Regional LN	IMPACTv6-CLIN-20180289	34.2	0	992	Skin, external ear	1	No	0	NRAS_Q61	0	#N/A	#N/A	#N/A	#N/A	#N/A	#N/A	#N/A	#N/A	#N/A	#N/A	#N/A	#N/A	#N/A	#N/A	#N/A	#N/A	#N/A	#N/A	#N/A	#N/A	#N/A
P-0031177-T01-IM6	Male	Cutaneous Melanoma	Metastasis	Adrenal Gland	Other Visceral	IMPACTv6-CLIN-20180306	45.4	0	10138	Skin, trunk	2	Unknown	0	BRAF_CLASS_1_V600E	0	#N/A	#N/A	#N/A	#N/A	#N/A	#N/A	#N/A	#N/A	#N/A	#N/A	#N/A	#N/A	#N/A	#N/A	#N/A	#N/A	#N/A	#N/A	#N/A	#N/A	#N/A
P-0031286-T01-IM6	Male	Cutaneous Melanoma	Metastasis	Lymph Node, Regional	LR / In-Transit / Regional LN	IMPACTv6-CLIN-20180312	63.7	0	462	Skin, neck	1	No	0	Other_Driver	0	#N/A	#N/A	#N/A	#N/A	#N/A	#N/A	#N/A	#N/A	#N/A	#N/A	#N/A	#N/A	#N/A	#N/A	#N/A	#N/A	#N/A	#N/A	#N/A	#N/A	#N/A
P-0031640-T01-IM6	Male	Cutaneous Melanoma	Metastasis	Liver	Liver	IMPACTv6-CLIN-20180340	76.3	0	1106	Skin, face	1	Yes	0	NRAS_Q61	1	Ipilimumab, Nivolumab	PD-1 Combo	0	0	23.0795	23.0795	77	1	Unknown	Unknown	Unknown	3.66667	0	9	9	1	1	0	1	M1c	M1d
P-0031794-T01-IM6	Male	Cutaneous Melanoma	Metastasis	Lymph Node, Regional	LR / In-Transit / Regional LN	IMPACTv6-CLIN-20180347	35.9	0	727	Skin, leg/hip	4	Yes	0	BRAF_CLASS_1_V600E	1	Ipilimumab, Nivolumab	PD-1 Combo	1	0	8.51507	22.5534	36	0	207	0.828	0	1.91304	0	9	9	0	0	0	0	M0	M0
P-0031887-T01-IM6	Female	Cutaneous Melanoma	Metastasis	Lymph Node, Regional	LR / In-Transit / Regional LN	IMPACTv6-CLIN-20180349	61.8	0	555	Skin, trunk	2	No	0	NRAS_Q61	0	#N/A	#N/A	#N/A	#N/A	#N/A	#N/A	#N/A	#N/A	#N/A	#N/A	#N/A	#N/A	#N/A	#N/A	#N/A	#N/A	#N/A	#N/A	#N/A	#N/A	#N/A
P-0032079-T01-IM6	Male	Cutaneous Melanoma	Metastasis	Lymph Node, Regional	LR / In-Transit / Regional LN	IMPACTv6-CLIN-20180369	31.8	0	520	Skin, neck	1	No	0	BRAF_CLASS_1_V600E	0	#N/A	#N/A	#N/A	#N/A	#N/A	#N/A	#N/A	#N/A	#N/A	#N/A	#N/A	#N/A	#N/A	#N/A	#N/A	#N/A	#N/A	#N/A	#N/A	#N/A	#N/A
P-0032185-T01-IM6	Male	Melanoma of Unknown Primary	Metastasis	Lung	Lung	IMPACTv6-CLIN-20180373	55.2	0	142	Unknown Primary	8	NA	0	NF1	0	#N/A	#N/A	#N/A	#N/A	#N/A	#N/A	#N/A	#N/A	#N/A	#N/A	#N/A	#N/A	#N/A	#N/A	#N/A	#N/A	#N/A	#N/A	#N/A	#N/A	#N/A
P-0032398-T01-IM6	Female	Cutaneous Melanoma	Metastasis	Lymph Node, Regional	LR / In-Transit / Regional LN	IMPACTv6-CLIN-20180388	63.8	1	2497	Skin, leg/hip	4	Yes	0	NRAS_Q61	1	Ipilimumab, Nivolumab	PD-1 Combo	1	1	1.38082	2.4	71	0	344	1.376	1	0.626667	0	9	9	1	1	1	1	M1c	M1d
P-0032404-T01-IM6	Female	Cutaneous Melanoma	Metastasis	Lymph Node, Regional	LR / In-Transit / Regional LN	IMPACTv6-CLIN-20180387	54.9	0	2314	Skin, face	1	No	0	Unknown_Driver	0	#N/A	#N/A	#N/A	#N/A	#N/A	#N/A	#N/A	#N/A	#N/A	#N/A	#N/A	#N/A	#N/A	#N/A	#N/A	#N/A	#N/A	#N/A	#N/A	#N/A	#N/A
P-0032570-T01-IM6	Male	Cutaneous Melanoma	Metastasis	Lymph Node, Non-Regional	Soft Tissue / Distant LN	IMPACTv6-CLIN-20180404	65.1	1	4823	Skin, neck	1	No	0	BRAF_CLASS_1_Other	0	#N/A	#N/A	#N/A	#N/A	#N/A	#N/A	#N/A	#N/A	#N/A	#N/A	#N/A	#N/A	#N/A	#N/A	#N/A	#N/A	#N/A	#N/A	#N/A	#N/A	#N/A
P-0032591-T01-IM6	Male	Cutaneous Melanoma	Primary	Not Applicable	NA	IMPACTv6-CLIN-20180407	90.5	1	550	Skin, face	1	No	0	Unknown_Driver	0	#N/A	#N/A	#N/A	#N/A	#N/A	#N/A	#N/A	#N/A	#N/A	#N/A	#N/A	#N/A	#N/A	#N/A	#N/A	#N/A	#N/A	#N/A	#N/A	#N/A	#N/A
P-0032650-T01-IM6	Male	Cutaneous Melanoma	Metastasis	Lung	Lung	IMPACTv6-CLIN-20180410	67.5	0	1372	Skin, face	1	No	0	BRAF_CLASS_2_3	1	Pembrolizumab	PD-1 Mono	0	0	22.5863	22.5863	69	0	224	0.896	0	2.72727	0	1	1	1	0	0	0	M1b	M1b
P-0032691-T01-IM6	Male	Cutaneous Melanoma	Primary	Not Applicable	NA	IMPACTv6-CLIN-20180408	81.5	0	243	Skin, scalp	1	No	0	BRAF_CLASS_1_V600E	1	Nivolumab	PD-1 Mono	1	0	3.35342	5.88493	82	0	205	0.82	0	6	1	0	0	0	0	0	0	M0	M0
P-0032739-T01-IM6	Female	Cutaneous Melanoma	Metastasis	Lymph Node, Regional	LR / In-Transit / Regional LN	IMPACTv6-CLIN-20180413	50.8	0	1230	Skin, face	1	No	0	BRAF_CLASS_1_V600E	0	#N/A	#N/A	#N/A	#N/A	#N/A	#N/A	#N/A	#N/A	#N/A	#N/A	#N/A	#N/A	#N/A	#N/A	#N/A	#N/A	#N/A	#N/A	#N/A	#N/A	#N/A
P-0032746-T01-IM6	Female	Cutaneous Melanoma	Primary	Not Applicable	NA	IMPACTv6-CLIN-20180413	78.1	0	715	Skin, external ear	1	No	0	BRAF_CLASS_1_Other	0	#N/A	#N/A	#N/A	#N/A	#N/A	#N/A	#N/A	#N/A	#N/A	#N/A	#N/A	#N/A	#N/A	#N/A	#N/A	#N/A	#N/A	#N/A	#N/A	#N/A	#N/A
P-0032780-T01-IM6	Female	Cutaneous Melanoma	Metastasis	Lymph Node, Regional	LR / In-Transit / Regional LN	IMPACTv6-CLIN-20180414	57.3	0	2651	Skin, scalp	1	No	0	Other_Driver	0	#N/A	#N/A	#N/A	#N/A	#N/A	#N/A	#N/A	#N/A	#N/A	#N/A	#N/A	#N/A	#N/A	#N/A	#N/A	#N/A	#N/A	#N/A	#N/A	#N/A	#N/A
P-0032800-T01-IM6	Male	Cutaneous Melanoma	Metastasis	Lymph Node, Regional	LR / In-Transit / Regional LN	IMPACTv6-CLIN-20180419	62.3	0	624	Skin, trunk	2	Yes	0	NRAS_Q61	1	Pembrolizumab	PD-1 Mono	0	0	13.4137	13.4137	63	0	123	0.492	0	3.1	0	0	1	1	0	0	0	M1b	M1b
P-0032845-T01-IM6	Female	Cutaneous Melanoma	Primary	Not Applicable	NA	IMPACTv6-CLIN-20180416	35.5	0	341	Skin, trunk	2	Yes	0	NRAS_Q61	0	#N/A	#N/A	#N/A	#N/A	#N/A	#N/A	#N/A	#N/A	#N/A	#N/A	#N/A	#N/A	#N/A	#N/A	#N/A	#N/A	#N/A	#N/A	#N/A	#N/A	#N/A
P-0032896-T01-IM6	Male	Cutaneous Melanoma	Metastasis	Lymph Node, Regional	LR / In-Transit / Regional LN	IMPACTv6-CLIN-20180422	48.2	0	1036	Skin, trunk	2	Yes	0	NRAS_Q61	0	#N/A	#N/A	#N/A	#N/A	#N/A	#N/A	#N/A	#N/A	#N/A	#N/A	#N/A	#N/A	#N/A	#N/A	#N/A	#N/A	#N/A	#N/A	#N/A	#N/A	#N/A
P-0032937-T01-IM6	Female	Cutaneous Melanoma	Metastasis	Lymph Node, Regional	LR / In-Transit / Regional LN	IMPACTv6-CLIN-20180423R	31.4	0	10084	Skin, leg/hip	4	Unknown	0	BRAF_CLASS_1_V600E	0	#N/A	#N/A	#N/A	#N/A	#N/A	#N/A	#N/A	#N/A	#N/A	#N/A	#N/A	#N/A	#N/A	#N/A	#N/A	#N/A	#N/A	#N/A	#N/A	#N/A	#N/A
P-0032984-T01-IM6	Female	Melanoma of Unknown Primary	Metastasis	In-transit	LR / In-Transit / Regional LN	IMPACTv6-CLIN-20180425	48.2	0	3578	Unknown Primary	8	NA	0	NRAS_Q61	0	#N/A	#N/A	#N/A	#N/A	#N/A	#N/A	#N/A	#N/A	#N/A	#N/A	#N/A	#N/A	#N/A	#N/A	#N/A	#N/A	#N/A	#N/A	#N/A	#N/A	#N/A
P-0032996-T01-IM6	Male	Melanoma of Unknown Primary	Metastasis	Brain	Brain	IMPACTv6-CLIN-20180430	77.6	1	129	Unknown Primary	8	NA	0	BRAF_CLASS_1_V600E	0	#N/A	#N/A	#N/A	#N/A	#N/A	#N/A	#N/A	#N/A	#N/A	#N/A	#N/A	#N/A	#N/A	#N/A	#N/A	#N/A	#N/A	#N/A	#N/A	#N/A	#N/A
P-0033003-T01-IM6	Male	Cutaneous Melanoma	Metastasis	Small Bowel	Other Visceral	IMPACTv6-CLIN-20180430	53.7	1	3031	Skin, trunk	2	Unknown	0	NF1	0	#N/A	#N/A	#N/A	#N/A	#N/A	#N/A	#N/A	#N/A	#N/A	#N/A	#N/A	#N/A	#N/A	#N/A	#N/A	#N/A	#N/A	#N/A	#N/A	#N/A	#N/A
P-0033074-T01-IM6	Male	Cutaneous Melanoma	Metastasis	Lymph Node, Regional	LR / In-Transit / Regional LN	IMPACTv6-CLIN-20180433	55.9	0	274	Skin, trunk	2	Yes	0	BRAF_CLASS_1_V600E	0	#N/A	#N/A	#N/A	#N/A	#N/A	#N/A	#N/A	#N/A	#N/A	#N/A	#N/A	#N/A	#N/A	#N/A	#N/A	#N/A	#N/A	#N/A	#N/A	#N/A	#N/A
P-0033097-T01-IM6	Male	Cutaneous Melanoma	Metastasis	Lymph Node, Regional	LR / In-Transit / Regional LN	IMPACTv6-CLIN-20180436	38	0	2713	Skin, arm/shoulder	3	No	0	BRAF_CLASS_1_V600E	0	#N/A	#N/A	#N/A	#N/A	#N/A	#N/A	#N/A	#N/A	#N/A	#N/A	#N/A	#N/A	#N/A	#N/A	#N/A	#N/A	#N/A	#N/A	#N/A	#N/A	#N/A
P-0033151-T01-IM6	Male	Melanoma of Unknown Primary	Metastasis	Lymph Node, Regional	LR / In-Transit / Regional LN	IMPACTv6-CLIN-20180432	74.7	0	691	Unknown Primary	8	NA	0	NRAS_Q61	1	Ipilimumab, Nivolumab	PD-1 Combo	1	0	2.56438	21.6329	75	0	178	0.712	0	3.4	0	9	9	1	0	0	0	M1b	M1b
P-0033199-T01-IM6	Female	Melanoma of Unknown Primary	Metastasis	Bone	Bone	IMPACTv6-CLIN-20180440	51.5	0	63	Unknown Primary	8	NA	0	BRAF_CLASS_1_V600E	0	#N/A	#N/A	#N/A	#N/A	#N/A	#N/A	#N/A	#N/A	#N/A	#N/A	#N/A	#N/A	#N/A	#N/A	#N/A	#N/A	#N/A	#N/A	#N/A	#N/A	#N/A
P-0033292-T01-IM6	Female	Cutaneous Melanoma	Metastasis	In-transit	LR / In-Transit / Regional LN	IMPACTv6-CLIN-20180446	58.3	0	1441	Skin, arm/shoulder	3	Yes	0	BRAF_CLASS_1_V600E	0	#N/A	#N/A	#N/A	#N/A	#N/A	#N/A	#N/A	#N/A	#N/A	#N/A	#N/A	#N/A	#N/A	#N/A	#N/A	#N/A	#N/A	#N/A	#N/A	#N/A	#N/A
P-0033354-T01-IM6	Male	Cutaneous Melanoma	Primary	Not Applicable	NA	IMPACTv6-CLIN-20180449	48.4	0	347	Skin, trunk	2	Yes	0	BRAF_CLASS_1_V600E	0	#N/A	#N/A	#N/A	#N/A	#N/A	#N/A	#N/A	#N/A	#N/A	#N/A	#N/A	#N/A	#N/A	#N/A	#N/A	#N/A	#N/A	#N/A	#N/A	#N/A	#N/A
P-0033363-T01-IM6	Female	Cutaneous Melanoma	Metastasis	In-transit	LR / In-Transit / Regional LN	IMPACTv6-CLIN-20180450	55.5	0	2735	Skin, face	1	No	0	BRAF_CLASS_1_V600E	0	#N/A	#N/A	#N/A	#N/A	#N/A	#N/A	#N/A	#N/A	#N/A	#N/A	#N/A	#N/A	#N/A	#N/A	#N/A	#N/A	#N/A	#N/A	#N/A	#N/A	#N/A
P-0033378-T01-IM6	Male	Cutaneous Melanoma	Metastasis	Lung	Lung	IMPACTv6-CLIN-20180447R	85.7	0	1334	Skin, scalp	1	No	0	KIT_PDGFRA	1	Nivolumab	PD-1 Mono	1	0	16.537	23.4411	87	1	159	0.636	0	3.28571	0	1	1	1	0	0	0	M1b	M1b
P-0033470-T01-IM6	Female	Cutaneous Melanoma	Primary	Not Applicable	NA	IMPACTv6-CLIN-20180460	61.7	0	288	Skin, leg/hip	4	Yes	0	NRAS_Q61	0	#N/A	#N/A	#N/A	#N/A	#N/A	#N/A	#N/A	#N/A	#N/A	#N/A	#N/A	#N/A	#N/A	#N/A	#N/A	#N/A	#N/A	#N/A	#N/A	#N/A	#N/A
P-0033610-T01-IM6	Male	Cutaneous Melanoma	Metastasis	Liver	Liver	IMPACTv6-CLIN-20180469	43.2	1	3008	Skin, trunk	2	Unknown	0	BRAF_CLASS_1_V600E	0	#N/A	#N/A	#N/A	#N/A	#N/A	#N/A	#N/A	#N/A	#N/A	#N/A	#N/A	#N/A	#N/A	#N/A	#N/A	#N/A	#N/A	#N/A	#N/A	#N/A	#N/A
P-0033654-T01-IM6	Female	Melanoma of Unknown Primary	Metastasis	In-transit	LR / In-Transit / Regional LN	IMPACTv6-CLIN-20180468	76.7	0	217	Unknown Primary	8	NA	0	NF1	0	#N/A	#N/A	#N/A	#N/A	#N/A	#N/A	#N/A	#N/A	#N/A	#N/A	#N/A	#N/A	#N/A	#N/A	#N/A	#N/A	#N/A	#N/A	#N/A	#N/A	#N/A
P-0033779-T01-IM6	Female	Cutaneous Melanoma	Metastasis	Liver	Liver	IMPACTv6-CLIN-20180475	28.3	0	991	Skin, leg/hip	4	No	0	BRAF_CLASS_1_V600E	0	#N/A	#N/A	#N/A	#N/A	#N/A	#N/A	#N/A	#N/A	#N/A	#N/A	#N/A	#N/A	#N/A	#N/A	#N/A	#N/A	#N/A	#N/A	#N/A	#N/A	#N/A
P-0033782-T01-IM6	Male	Cutaneous Melanoma	Metastasis	Lymph Node, Regional	LR / In-Transit / Regional LN	IMPACTv6-CLIN-20180475	51	0	1600	Skin, face	1	Yes	0	BRAF_CLASS_2_3	1	Ipilimumab, Nivolumab	PD-1 Combo	0	0	20.4164	20.4164	54	0	197	0.788	0	1.52941	0	9	9	1	0	0	0	M1b	M1b
P-0033795-T01-IM6	Male	Cutaneous Melanoma	Metastasis	In-transit	LR / In-Transit / Regional LN	IMPACTv6-CLIN-20180480	54.9	0	4310	Skin, arm/shoulder	3	Yes	0	NRAS_Q61	0	#N/A	#N/A	#N/A	#N/A	#N/A	#N/A	#N/A	#N/A	#N/A	#N/A	#N/A	#N/A	#N/A	#N/A	#N/A	#N/A	#N/A	#N/A	#N/A	#N/A	#N/A
P-0033935-T01-IM6	Female	Cutaneous Melanoma	Primary	Not Applicable	NA	IMPACTv6-CLIN-20180491	74.2	0	59	Skin, scalp	1	Yes	0	NF1	0	#N/A	#N/A	#N/A	#N/A	#N/A	#N/A	#N/A	#N/A	#N/A	#N/A	#N/A	#N/A	#N/A	#N/A	#N/A	#N/A	#N/A	#N/A	#N/A	#N/A	#N/A
P-0033950-T01-IM6	Male	Melanoma of Unknown Primary	Metastasis	Small Intestine	Other Visceral	IMPACTv6-CLIN-20180490	70.2	0	534	Unknown Primary	8	NA	0	BRAF_CLASS_1_V600E	1	Ipilimumab, Nivolumab	PD-1 Combo	1	0	2.69589	16.8329	70	0	415	1.66	1	8.71429	1	9	9	0	0	0	0	M1c	M1c
P-0033965-T01-IM6	Male	Cutaneous Melanoma	Metastasis	Brain	Brain	IMPACTv6-CLIN-20180486	64.6	1	1351	Skin, trunk	2	No	0	BRAF_CLASS_2_3	0	#N/A	#N/A	#N/A	#N/A	#N/A	#N/A	#N/A	#N/A	#N/A	#N/A	#N/A	#N/A	#N/A	#N/A	#N/A	#N/A	#N/A	#N/A	#N/A	#N/A	#N/A
P-0034034-T01-IM6	Female	Cutaneous Melanoma	Primary	Not Applicable	NA	IMPACTv6-CLIN-20180485R	70.4	0	737	Skin, trunk	2	Yes	0	NRAS_Q61	0	#N/A	#N/A	#N/A	#N/A	#N/A	#N/A	#N/A	#N/A	#N/A	#N/A	#N/A	#N/A	#N/A	#N/A	#N/A	#N/A	#N/A	#N/A	#N/A	#N/A	#N/A
P-0034042-T01-IM6	Male	Cutaneous Melanoma	Metastasis	In-transit	LR / In-Transit / Regional LN	IMPACTv6-CLIN-20180492	52.4	0	3634	Skin, leg/hip	4	No	0	NF1	0	#N/A	#N/A	#N/A	#N/A	#N/A	#N/A	#N/A	#N/A	#N/A	#N/A	#N/A	#N/A	#N/A	#N/A	#N/A	#N/A	#N/A	#N/A	#N/A	#N/A	#N/A
P-0034168-T01-IM6	Male	Cutaneous Melanoma	Metastasis	Small Bowel	Other Visceral	IMPACTv6-CLIN-20180500	63.8	0	1059	Skin, trunk	2	No	0	BRAF_CLASS_2_3	0	#N/A	#N/A	#N/A	#N/A	#N/A	#N/A	#N/A	#N/A	#N/A	#N/A	#N/A	#N/A	#N/A	#N/A	#N/A	#N/A	#N/A	#N/A	#N/A	#N/A	#N/A
P-0034178-T01-IM6	Female	Cutaneous Melanoma	Metastasis	Lymph Node, Regional	LR / In-Transit / Regional LN	IMPACTv6-CLIN-20180502	46.9	0	715	Skin, trunk	2	No	0	BRAF_CLASS_1_V600E	0	#N/A	#N/A	#N/A	#N/A	#N/A	#N/A	#N/A	#N/A	#N/A	#N/A	#N/A	#N/A	#N/A	#N/A	#N/A	#N/A	#N/A	#N/A	#N/A	#N/A	#N/A
P-0034234-T01-IM6	Male	Cutaneous Melanoma	Metastasis	Lymph Node, Regional	LR / In-Transit / Regional LN	IMPACTv6-CLIN-20180504	63.2	0	349	Skin, arm/shoulder	3	Yes	0	NRAS_Q61	1	Ipilimumab, Nivolumab	PD-1 Combo	1	0	2.9589	7.85753	64	1	273	1.092	1	7	1	9	9	0	0	0	0	M1c	M0
P-0034282-T01-IM6	Male	Cutaneous Melanoma	Metastasis	In-transit	LR / In-Transit / Regional LN	IMPACTv6-CLIN-20180507	71	0	451	Skin, arm/shoulder	3	No	0	RAS_OTHER	0	#N/A	#N/A	#N/A	#N/A	#N/A	#N/A	#N/A	#N/A	#N/A	#N/A	#N/A	#N/A	#N/A	#N/A	#N/A	#N/A	#N/A	#N/A	#N/A	#N/A	#N/A
P-0034283-T01-IM6	Male	Cutaneous Melanoma	Metastasis	In-transit	LR / In-Transit / Regional LN	IMPACTv6-CLIN-20180507	68	0	1020	Skin, arm/shoulder	3	No	0	BRAF_CLASS_2_3	0	#N/A	#N/A	#N/A	#N/A	#N/A	#N/A	#N/A	#N/A	#N/A	#N/A	#N/A	#N/A	#N/A	#N/A	#N/A	#N/A	#N/A	#N/A	#N/A	#N/A	#N/A
P-0034370-T01-IM6	Female	Cutaneous Melanoma	Metastasis	Lymph Node, Regional	LR / In-Transit / Regional LN	IMPACTv6-CLIN-20180514	64.6	0	6792	Skin, trunk	2	Unknown	0	NRAS_Q61	0	#N/A	#N/A	#N/A	#N/A	#N/A	#N/A	#N/A	#N/A	#N/A	#N/A	#N/A	#N/A	#N/A	#N/A	#N/A	#N/A	#N/A	#N/A	#N/A	#N/A	#N/A
P-0034392-T01-IM6	Male	Cutaneous Melanoma	Primary	Not Applicable	NA	IMPACTv6-CLIN-20180515	74.5	0	208	Skin, arm/shoulder	3	Yes	0	NRAS_Q61	0	#N/A	#N/A	#N/A	#N/A	#N/A	#N/A	#N/A	#N/A	#N/A	#N/A	#N/A	#N/A	#N/A	#N/A	#N/A	#N/A	#N/A	#N/A	#N/A	#N/A	#N/A
P-0034697-T01-IM6	Male	Cutaneous Melanoma	Metastasis	Pleura	Lung	IMPACTv6-CLIN-20180534R	68.8	0	4674	Skin, trunk	2	No	0	NF1	1	Ipilimumab, Nivolumab	PD-1 Combo	1	0	5.58904	17.9507	80	0	469	1.876	1	11.625	1	9	9	1	0	0	0	M1c	M1b
P-0035069-T01-IM6	Male	Cutaneous Melanoma	Primary	Not Applicable	NA	IMPACTv6-CLIN-20180555	35.4	1	245	Skin, trunk	2	Yes	1	NRAS_Q61	0	#N/A	#N/A	#N/A	#N/A	#N/A	#N/A	#N/A	#N/A	#N/A	#N/A	#N/A	#N/A	#N/A	#N/A	#N/A	#N/A	#N/A	#N/A	#N/A	#N/A	#N/A
P-0035134-T01-IM6	Male	Cutaneous Melanoma	Metastasis	In-transit	LR / In-Transit / Regional LN	IMPACTv6-CLIN-20180557	68.3	0	615	Skin, scalp	1	Yes	0	NRAS_Q61	1	Pembrolizumab	PD-1 Mono	0	0	18.3781	18.3781	69	0	139	0.556	0	7.625	1	0	0	0	0	0	0	M0	M0
P-0035224-T01-IM6	Male	Cutaneous Melanoma	Primary	Not Applicable	NA	IMPACTv6-CLIN-20180566	53.8	0	216	Skin, face	1	Yes	0	KIT_PDGFRA	0	#N/A	#N/A	#N/A	#N/A	#N/A	#N/A	#N/A	#N/A	#N/A	#N/A	#N/A	#N/A	#N/A	#N/A	#N/A	#N/A	#N/A	#N/A	#N/A	#N/A	#N/A
P-0035430-T01-IM6	Male	Cutaneous Melanoma	Primary	Not Applicable	NA	IMPACTv6-CLIN-20180573	70.6	0	258	Skin, leg/hip	4	Yes	0	Unknown_Driver	0	#N/A	#N/A	#N/A	#N/A	#N/A	#N/A	#N/A	#N/A	#N/A	#N/A	#N/A	#N/A	#N/A	#N/A	#N/A	#N/A	#N/A	#N/A	#N/A	#N/A	#N/A
P-0035511-T01-IM6	Female	Cutaneous Melanoma	Metastasis	Brain	Brain	IMPACTv6-CLIN-20180580	42.4	0	4431	Skin, arm/shoulder	3	No	0	RAS_OTHER	0	#N/A	#N/A	#N/A	#N/A	#N/A	#N/A	#N/A	#N/A	#N/A	#N/A	#N/A	#N/A	#N/A	#N/A	#N/A	#N/A	#N/A	#N/A	#N/A	#N/A	#N/A
P-0035523-T01-IM6	Female	Cutaneous Melanoma	Metastasis	Stomach	Other Visceral	IMPACTv6-CLIN-20180578	69	1	4030	Skin, face	1	No	0	NRAS_Q61	1	Ipilimumab, Nivolumab	PD-1 Combo	1	1	1.54521	7.89041	79	1	410	1.64	1	5.94444	1	9	9	1	1	0	1	M1c	M1d
P-0035564-T01-IM6	Female	Cutaneous Melanoma	Metastasis	In-transit	LR / In-Transit / Regional LN	IMPACTv6-CLIN-20180582	79.8	0	203	Skin, leg/hip	4	Yes	0	NRAS_Q61	0	#N/A	#N/A	#N/A	#N/A	#N/A	#N/A	#N/A	#N/A	#N/A	#N/A	#N/A	#N/A	#N/A	#N/A	#N/A	#N/A	#N/A	#N/A	#N/A	#N/A	#N/A
P-0035595-T01-IM6	Female	Cutaneous Melanoma	Metastasis	Brain	Brain	IMPACTv6-CLIN-20180584	15.2	0	1947	Skin, leg/hip	4	Yes	0	BRAF_CLASS_1_V600E	0	#N/A	#N/A	#N/A	#N/A	#N/A	#N/A	#N/A	#N/A	#N/A	#N/A	#N/A	#N/A	#N/A	#N/A	#N/A	#N/A	#N/A	#N/A	#N/A	#N/A	#N/A
P-0035784-T01-IM6	Male	Cutaneous Melanoma	Metastasis	Small bowel	Other Visceral	IMPACTv6-CLIN-20180596	63.6	0	2287	Skin, scalp	1	Yes	0	NF1	0	#N/A	#N/A	#N/A	#N/A	#N/A	#N/A	#N/A	#N/A	#N/A	#N/A	#N/A	#N/A	#N/A	#N/A	#N/A	#N/A	#N/A	#N/A	#N/A	#N/A	#N/A
P-0035910-T01-IM6	Male	Cutaneous Melanoma	Metastasis	Lymph Node, Regional	LR / In-Transit / Regional LN	IMPACTv6-CLIN-20180602	64.7	0	603	Skin, neck	1	Yes	0	KIT_PDGFRA	0	#N/A	#N/A	#N/A	#N/A	#N/A	#N/A	#N/A	#N/A	#N/A	#N/A	#N/A	#N/A	#N/A	#N/A	#N/A	#N/A	#N/A	#N/A	#N/A	#N/A	#N/A
P-0035974-T01-IM6	Female	Cutaneous Melanoma	Metastasis	Lymph Node, Regional	LR / In-Transit / Regional LN	IMPACTv6-CLIN-20180604	87.7	0	379	Skin, trunk	2	No	0	BRAF_CLASS_2_3	0	#N/A	#N/A	#N/A	#N/A	#N/A	#N/A	#N/A	#N/A	#N/A	#N/A	#N/A	#N/A	#N/A	#N/A	#N/A	#N/A	#N/A	#N/A	#N/A	#N/A	#N/A
P-0036089-T01-IM6	Male	Cutaneous Melanoma	Metastasis	Lymph Node, Regional	LR / In-Transit / Regional LN	IMPACTv6-CLIN-20180611	31.3	0	4235	Skin, trunk	2	No	0	BRAF_CLASS_1_V600E	1	Ipilimumab, Nivolumab	PD-1 Combo	1	0	2.92603	14.6959	42	0	318	1.272	1	5.5	1	9	9	1	0	1	0	M1c	M1c
P-0036095-T01-IM6	Male	Cutaneous Melanoma	Metastasis	Lymph Node, Regional	LR / In-Transit / Regional LN	IMPACTv6-CLIN-20180611	67.1	0	2827	Skin, neck	1	Unknown	0	NF1	0	#N/A	#N/A	#N/A	#N/A	#N/A	#N/A	#N/A	#N/A	#N/A	#N/A	#N/A	#N/A	#N/A	#N/A	#N/A	#N/A	#N/A	#N/A	#N/A	#N/A	#N/A
P-0036159-T01-IM6	Female	Melanoma of Unknown Primary	Metastasis	In-transit	LR / In-Transit / Regional LN	IMPACTv6-CLIN-20180623	89.7	0	223	Unknown Primary	8	NA	0	BRAF_CLASS_1_V600E	0	#N/A	#N/A	#N/A	#N/A	#N/A	#N/A	#N/A	#N/A	#N/A	#N/A	#N/A	#N/A	#N/A	#N/A	#N/A	#N/A	#N/A	#N/A	#N/A	#N/A	#N/A
P-0036240-T01-IM6	Female	Cutaneous Melanoma	Metastasis	Lymph Node, Regional	LR / In-Transit / Regional LN	IMPACTv6-CLIN-20180615	39.7	0	8373	Skin, leg/hip	4	No	0	BRAF_CLASS_1_V600E	1	Ipilimumab, Nivolumab	PD-1 Combo	1	0	6.31233	18.1808	61	0	233	0.932	0	2.61111	0	9	9	0	0	0	0	M0	M0
P-0036241-T01-IM6	Female	Cutaneous Melanoma	Primary	Not Applicable	NA	IMPACTv6-CLIN-20180615	77.4	0	32	Skin, arm/shoulder	3	Yes	0	BRAF_CLASS_1_Other	0	#N/A	#N/A	#N/A	#N/A	#N/A	#N/A	#N/A	#N/A	#N/A	#N/A	#N/A	#N/A	#N/A	#N/A	#N/A	#N/A	#N/A	#N/A	#N/A	#N/A	#N/A
P-0036260-T01-IM6	Male	Melanoma of Unknown Primary	Metastasis	Lung	Lung	IMPACTv6-CLIN-20180616	68.8	0	1319	Unknown Primary	8	NA	0	NRAS_Q61	1	Pembrolizumab	PD-1 Mono	1	0	20.9425	38.3014	69	0	Unknown	Unknown	Unknown	Unknown	Unknown	Unknown	Unknown	1	1	0	0	M1c	M1d
P-0036578-T01-IM6	Male	Cutaneous Melanoma	Primary	Not Applicable	NA	IMPACTv6-CLIN-20180646	32.9	0	266	Skin, neck	1	No	0	BRAF_CLASS_1_V600E	0	#N/A	#N/A	#N/A	#N/A	#N/A	#N/A	#N/A	#N/A	#N/A	#N/A	#N/A	#N/A	#N/A	#N/A	#N/A	#N/A	#N/A	#N/A	#N/A	#N/A	#N/A
P-0036680-T01-IM6	Female	Melanoma of Unknown Primary	Metastasis	Brain	Brain	IMPACTv6-CLIN-20180649	58.7	0	950	Unknown Primary	8	NA	0	BRAF_CLASS_2_3	1	Ipilimumab, Nivolumab	PD-1 Combo	0	0	29.6219	29.6219	59	0	Unknown	Unknown	Unknown	Unknown	Unknown	9	9	1	1	0	0	M1c	M1d
P-0036712-T01-IM6	Male	Cutaneous Melanoma	Primary	Not Applicable	NA	IMPACTv6-CLIN-20180654	77.3	0	204	Skin, trunk	2	No	0	BRAF_CLASS_1_V600E	0	#N/A	#N/A	#N/A	#N/A	#N/A	#N/A	#N/A	#N/A	#N/A	#N/A	#N/A	#N/A	#N/A	#N/A	#N/A	#N/A	#N/A	#N/A	#N/A	#N/A	#N/A
P-0036733-T01-IM6	Male	Cutaneous Melanoma	Metastasis	Lung	Lung	IMPACTv6-CLIN-20180655	63.8	0	2162	Skin, face	1	No	0	NF1	0	#N/A	#N/A	#N/A	#N/A	#N/A	#N/A	#N/A	#N/A	#N/A	#N/A	#N/A	#N/A	#N/A	#N/A	#N/A	#N/A	#N/A	#N/A	#N/A	#N/A	#N/A
P-0036794-T01-IM6	Female	Cutaneous Melanoma	Metastasis	Lymph Node, Regional	LR / In-Transit / Regional LN	IMPACTv6-CLIN-20180660	38.9	0	1142	Skin, neck	1	No	0	BRAF_CLASS_1_V600E	0	#N/A	#N/A	#N/A	#N/A	#N/A	#N/A	#N/A	#N/A	#N/A	#N/A	#N/A	#N/A	#N/A	#N/A	#N/A	#N/A	#N/A	#N/A	#N/A	#N/A	#N/A
P-0036809-T01-IM6	Male	Cutaneous Melanoma	Metastasis	Lung	Lung	IMPACTv6-CLIN-20180658	59.2	0	962	Skin, scalp	1	Unknown	0	NF1	1	Nivolumab	PD-1 Mono	0	0	17.326	17.326	60	0	239	0.956	0	7.66667	1	0	0	1	0	1	0	M1c	M1c
P-0036862-T01-IM6	Male	Melanoma of Unknown Primary	Metastasis	Spleen	Other Visceral	IMPACTv6-CLIN-20180657R	45.7	0	1170	Unknown Primary	8	NA	0	BRAF_CLASS_1_V600E	0	#N/A	#N/A	#N/A	#N/A	#N/A	#N/A	#N/A	#N/A	#N/A	#N/A	#N/A	#N/A	#N/A	#N/A	#N/A	#N/A	#N/A	#N/A	#N/A	#N/A	#N/A
P-0036873-T01-IM6	Male	Cutaneous Melanoma	Metastasis	Lymph Node, Regional	LR / In-Transit / Regional LN	IMPACTv6-CLIN-20180657R	84.1	0	1096	Skin, trunk	2	Yes	0	Other_Driver	0	#N/A	#N/A	#N/A	#N/A	#N/A	#N/A	#N/A	#N/A	#N/A	#N/A	#N/A	#N/A	#N/A	#N/A	#N/A	#N/A	#N/A	#N/A	#N/A	#N/A	#N/A
P-0037110-T01-IM6	Male	Cutaneous Melanoma	Metastasis	Lymph Node, Regional	LR / In-Transit / Regional LN	IMPACTv6-CLIN-20180673	81	0	501	Skin, neck	1	Yes	0	NF1	0	#N/A	#N/A	#N/A	#N/A	#N/A	#N/A	#N/A	#N/A	#N/A	#N/A	#N/A	#N/A	#N/A	#N/A	#N/A	#N/A	#N/A	#N/A	#N/A	#N/A	#N/A
P-0037116-T01-IM6	Male	Cutaneous Melanoma	Primary	Not Applicable	NA	IMPACTv6-CLIN-20180673	30.2	0	147	Skin, trunk	2	No	0	BRAF_CLASS_1_V600E	0	#N/A	#N/A	#N/A	#N/A	#N/A	#N/A	#N/A	#N/A	#N/A	#N/A	#N/A	#N/A	#N/A	#N/A	#N/A	#N/A	#N/A	#N/A	#N/A	#N/A	#N/A
P-0037118-T01-IM6	Male	Cutaneous Melanoma	Primary	Not Applicable	NA	IMPACTv6-CLIN-20180673	93.6	1	462	Skin, arm/shoulder	3	Yes	0	NRAS_Q61	1	Nivolumab	PD-1 Mono	1	1	2.86027	12.6904	94	1	183	0.732	0	8.33333	1	0	0	1	0	0	0	M1b	M1b
P-0037130-T01-IM6	Male	Cutaneous Melanoma	Metastasis	Lymph Node, Regional	LR / In-Transit / Regional LN	IMPACTv6-CLIN-20180674	77.3	0	598	Skin, trunk	2	No	0	NF1	0	#N/A	#N/A	#N/A	#N/A	#N/A	#N/A	#N/A	#N/A	#N/A	#N/A	#N/A	#N/A	#N/A	#N/A	#N/A	#N/A	#N/A	#N/A	#N/A	#N/A	#N/A
P-0037408-T01-IM6	Female	Cutaneous Melanoma	Metastasis	Liver	Liver	Unsure - Pulled manually	90.1	0	567	Skin, face	1	No	0	NF1	0	#N/A	#N/A	#N/A	#N/A	#N/A	#N/A	#N/A	#N/A	#N/A	#N/A	#N/A	#N/A	#N/A	#N/A	#N/A	#N/A	#N/A	#N/A	#N/A	#N/A	#N/A
P-0037606-T02-IM6	Female	Cutaneous Melanoma	Metastasis	Lung	Lung	IMPACTv6-CLIN-20190025	66	0	591	Skin, arm/shoulder	3	No	0	NF1	0	#N/A	#N/A	#N/A	#N/A	#N/A	#N/A	#N/A	#N/A	#N/A	#N/A	#N/A	#N/A	#N/A	#N/A	#N/A	#N/A	#N/A	#N/A	#N/A	#N/A	#N/A
P-0037685-T01-IM6	Male	Cutaneous Melanoma	Local Recurrence	Not Applicable	LR / In-Transit / Regional LN	IMPACTv6-CLIN-20190032R	72.6	0	387	Skin, eyelid	1	No	0	Other_Driver	0	#N/A	#N/A	#N/A	#N/A	#N/A	#N/A	#N/A	#N/A	#N/A	#N/A	#N/A	#N/A	#N/A	#N/A	#N/A	#N/A	#N/A	#N/A	#N/A	#N/A	#N/A
P-0037749-T01-IM6	Female	Cutaneous Melanoma	Primary	Not Applicable	NA	IMPACTv6-CLIN-20190037	57.7	0	177	Skin, leg/hip	4	No	0	BRAF_CLASS_1_V600E	0	#N/A	#N/A	#N/A	#N/A	#N/A	#N/A	#N/A	#N/A	#N/A	#N/A	#N/A	#N/A	#N/A	#N/A	#N/A	#N/A	#N/A	#N/A	#N/A	#N/A	#N/A
P-0037755-T01-IM6	Male	Cutaneous Melanoma	Primary	Not Applicable	NA	IMPACTv6-CLIN-20190040	53.2	0	756	Skin, arm/shoulder	3	Yes	0	NRAS_Q61	0	#N/A	#N/A	#N/A	#N/A	#N/A	#N/A	#N/A	#N/A	#N/A	#N/A	#N/A	#N/A	#N/A	#N/A	#N/A	#N/A	#N/A	#N/A	#N/A	#N/A	#N/A
P-0037873-T01-IM6	Female	Cutaneous Melanoma	Metastasis	Lymph Node, Regional	LR / In-Transit / Regional LN	IMPACTv6-CLIN-20190047	73.9	0	4363	Skin, leg/hip	4	No	0	NF1	0	#N/A	#N/A	#N/A	#N/A	#N/A	#N/A	#N/A	#N/A	#N/A	#N/A	#N/A	#N/A	#N/A	#N/A	#N/A	#N/A	#N/A	#N/A	#N/A	#N/A	#N/A
P-0037913-T01-IM6	Female	Cutaneous Melanoma	Primary	Not Applicable	NA	IMPACTv6-CLIN-20190044R	44.6	0	113	Skin, arm/shoulder	3	No	0	NF1	0	#N/A	#N/A	#N/A	#N/A	#N/A	#N/A	#N/A	#N/A	#N/A	#N/A	#N/A	#N/A	#N/A	#N/A	#N/A	#N/A	#N/A	#N/A	#N/A	#N/A	#N/A
P-0037955-T01-IM6	Female	Cutaneous Melanoma	Primary	Not Applicable	NA	IMPACTv6-CLIN-20190052	83.3	0	356	Skin, leg/hip	4	Yes	0	BRAF_CLASS_1_V600E	0	#N/A	#N/A	#N/A	#N/A	#N/A	#N/A	#N/A	#N/A	#N/A	#N/A	#N/A	#N/A	#N/A	#N/A	#N/A	#N/A	#N/A	#N/A	#N/A	#N/A	#N/A
P-0038079-T01-IM6	Female	Melanoma of Unknown Primary	Metastasis	Lymph Node, Regional	LR / In-Transit / Regional LN	IMPACTv6-CLIN-20190057	45.4	0	245	Unknown Primary	8	NA	0	BRAF_CLASS_1_V600E	0	#N/A	#N/A	#N/A	#N/A	#N/A	#N/A	#N/A	#N/A	#N/A	#N/A	#N/A	#N/A	#N/A	#N/A	#N/A	#N/A	#N/A	#N/A	#N/A	#N/A	#N/A
P-0038279-T01-IM6	Female	Cutaneous Melanoma	Metastasis	Lymph Node, Non-Regional	Soft Tissue / Distant LN	IMPACTv6-CLIN-20190070	59.3	0	1585	Skin, neck	1	No	0	NF1	0	#N/A	#N/A	#N/A	#N/A	#N/A	#N/A	#N/A	#N/A	#N/A	#N/A	#N/A	#N/A	#N/A	#N/A	#N/A	#N/A	#N/A	#N/A	#N/A	#N/A	#N/A
P-0038372-T01-IM6	Male	Cutaneous Melanoma	Metastasis	Spine	Bone	IMPACTv6-CLIN-20190084	67	1	2074	Skin, scalp	1	Yes	0	NF1	0	#N/A	#N/A	#N/A	#N/A	#N/A	#N/A	#N/A	#N/A	#N/A	#N/A	#N/A	#N/A	#N/A	#N/A	#N/A	#N/A	#N/A	#N/A	#N/A	#N/A	#N/A
P-0038390-T01-IM6	Female	Melanoma of Unknown Primary	Metastasis	Lymph Node, Regional	LR / In-Transit / Regional LN	IMPACTv6-CLIN-20190078	33.6	0	841	Unknown Primary	8	NA	0	Unknown_Driver	0	#N/A	#N/A	#N/A	#N/A	#N/A	#N/A	#N/A	#N/A	#N/A	#N/A	#N/A	#N/A	#N/A	#N/A	#N/A	#N/A	#N/A	#N/A	#N/A	#N/A	#N/A
P-0038676-T01-IM6	Female	Melanoma of Unknown Primary	Metastasis	Lymph Node, Regional	LR / In-Transit / Regional LN	Unsure - Pulled manually	61.6	0	113	Unknown Primary	8	NA	0	BRAF_CLASS_1_Other	0	#N/A	#N/A	#N/A	#N/A	#N/A	#N/A	#N/A	#N/A	#N/A	#N/A	#N/A	#N/A	#N/A	#N/A	#N/A	#N/A	#N/A	#N/A	#N/A	#N/A	#N/A
P-0038722-T01-IM6	Male	Melanoma of Unknown Primary	Metastasis	Brain	Brain	Unsure - Pulled manually	51.8	0	1874	Unknown Primary	8	NA	0	NRAS_Q61	0	#N/A	#N/A	#N/A	#N/A	#N/A	#N/A	#N/A	#N/A	#N/A	#N/A	#N/A	#N/A	#N/A	#N/A	#N/A	#N/A	#N/A	#N/A	#N/A	#N/A	#N/A
P-0038799-T01-IM6	Male	Cutaneous Melanoma	Primary	Not Applicable	NA	Unsure - Pulled manually	56.1	0	119	Skin, leg/hip	4	No	0	KIT_PDGFRA	0	#N/A	#N/A	#N/A	#N/A	#N/A	#N/A	#N/A	#N/A	#N/A	#N/A	#N/A	#N/A	#N/A	#N/A	#N/A	#N/A	#N/A	#N/A	#N/A	#N/A	#N/A
P-0038817-T01-IM6	Male	Cutaneous Melanoma	Metastasis	Small Bowel	Other Visceral	Unsure - Pulled manually	51	0	2910	Skin, leg/hip	4	No	0	Other_Driver	0	#N/A	#N/A	#N/A	#N/A	#N/A	#N/A	#N/A	#N/A	#N/A	#N/A	#N/A	#N/A	#N/A	#N/A	#N/A	#N/A	#N/A	#N/A	#N/A	#N/A	#N/A
P-0038936-T01-IM6	Male	Melanoma of Unknown Primary	Metastasis	Lymph Node, Regional	LR / In-Transit / Regional LN	IMPACTv6-CLIN-20190114	67.7	0	178	Unknown Primary	8	NA	0	Other_Driver	0	#N/A	#N/A	#N/A	#N/A	#N/A	#N/A	#N/A	#N/A	#N/A	#N/A	#N/A	#N/A	#N/A	#N/A	#N/A	#N/A	#N/A	#N/A	#N/A	#N/A	#N/A
P-0038967-T01-IM6	Male	Melanoma of Unknown Primary	Metastasis	In-transit	LR / In-Transit / Regional LN	IMPACTv6-CLIN-20190112	61.7	0	78	Unknown Primary	8	NA	0	NRAS_Q61	0	#N/A	#N/A	#N/A	#N/A	#N/A	#N/A	#N/A	#N/A	#N/A	#N/A	#N/A	#N/A	#N/A	#N/A	#N/A	#N/A	#N/A	#N/A	#N/A	#N/A	#N/A
P-0039052-T01-IM6	Male	Cutaneous Melanoma	Primary	Not Applicable	NA	IMPACTv6-CLIN-20190119	71.3	0	84	Skin, trunk	2	Yes	0	NRAS_Q61	0	#N/A	#N/A	#N/A	#N/A	#N/A	#N/A	#N/A	#N/A	#N/A	#N/A	#N/A	#N/A	#N/A	#N/A	#N/A	#N/A	#N/A	#N/A	#N/A	#N/A	#N/A
P-0039091-T01-IM6	Female	Cutaneous Melanoma	Primary	Not Applicable	NA	IMPACTv6-CLIN-20190120	85.8	0	216	Skin, face	1	No	0	Other_Driver	0	#N/A	#N/A	#N/A	#N/A	#N/A	#N/A	#N/A	#N/A	#N/A	#N/A	#N/A	#N/A	#N/A	#N/A	#N/A	#N/A	#N/A	#N/A	#N/A	#N/A	#N/A
P-0039162-T01-IM6	Male	Cutaneous Melanoma	Metastasis	Lymph Node, Regional	LR / In-Transit / Regional LN	IMPACTv6-CLIN-20190126	22.5	0	61	Skin, trunk	2	No	0	BRAF_CLASS_1_V600E	0	#N/A	#N/A	#N/A	#N/A	#N/A	#N/A	#N/A	#N/A	#N/A	#N/A	#N/A	#N/A	#N/A	#N/A	#N/A	#N/A	#N/A	#N/A	#N/A	#N/A	#N/A
P-0039170-T01-IM6	Female	Cutaneous Melanoma	Metastasis	In-transit	LR / In-Transit / Regional LN	IMPACTv6-CLIN-20190126	88	0	773	Skin, leg/hip	4	Unknown	0	NRAS_Q61	0	#N/A	#N/A	#N/A	#N/A	#N/A	#N/A	#N/A	#N/A	#N/A	#N/A	#N/A	#N/A	#N/A	#N/A	#N/A	#N/A	#N/A	#N/A	#N/A	#N/A	#N/A
P-0039179-T01-IM6	Female	Cutaneous Melanoma	Metastasis	Liver	Liver	IMPACTv6-CLIN-20190129	37.3	0	870	Skin, face	1	No	0	NF1	0	#N/A	#N/A	#N/A	#N/A	#N/A	#N/A	#N/A	#N/A	#N/A	#N/A	#N/A	#N/A	#N/A	#N/A	#N/A	#N/A	#N/A	#N/A	#N/A	#N/A	#N/A
P-0039287-T01-IM6	Female	Melanoma of Unknown Primary	Metastasis	Soft Tissue	Soft Tissue / Distant LN	IMPACTv6-CLIN-20190134	53.8	0	237	Unknown Primary	8	NA	0	NF1	0	#N/A	#N/A	#N/A	#N/A	#N/A	#N/A	#N/A	#N/A	#N/A	#N/A	#N/A	#N/A	#N/A	#N/A	#N/A	#N/A	#N/A	#N/A	#N/A	#N/A	#N/A
P-0039360-T01-IM6	Male	Cutaneous Melanoma	Metastasis	Brain	Brain	IMPACTv6-CLIN-20190139	57.1	0	5728	Skin, arm/shoulder	3	No	0	NF1	0	#N/A	#N/A	#N/A	#N/A	#N/A	#N/A	#N/A	#N/A	#N/A	#N/A	#N/A	#N/A	#N/A	#N/A	#N/A	#N/A	#N/A	#N/A	#N/A	#N/A	#N/A
P-0039410-T01-IM6	Female	Cutaneous Melanoma	Metastasis	Not Applicable	Soft Tissue / Distant LN	IMPACTv6-CLIN-20190144R	33.3	0	9758	Skin, trunk	2	Unknown	0	BRAF_CLASS_1_V600E	0	#N/A	#N/A	#N/A	#N/A	#N/A	#N/A	#N/A	#N/A	#N/A	#N/A	#N/A	#N/A	#N/A	#N/A	#N/A	#N/A	#N/A	#N/A	#N/A	#N/A	#N/A
P-0039415-T01-IM6	Male	Cutaneous Melanoma	Metastasis	Lymph Node, Regional	LR / In-Transit / Regional LN	IMPACTv6-CLIN-20190144R	19.7	0	2390	Skin, arm/shoulder	3	No	0	BRAF_CLASS_2_3	0	#N/A	#N/A	#N/A	#N/A	#N/A	#N/A	#N/A	#N/A	#N/A	#N/A	#N/A	#N/A	#N/A	#N/A	#N/A	#N/A	#N/A	#N/A	#N/A	#N/A	#N/A
P-0039426-T01-IM6	Male	Cutaneous Melanoma	Metastasis	Lung	Lung	IMPACTv6-CLIN-20190143	55	0	1102	Skin, arm/shoulder	3	No	0	NF1	0	#N/A	#N/A	#N/A	#N/A	#N/A	#N/A	#N/A	#N/A	#N/A	#N/A	#N/A	#N/A	#N/A	#N/A	#N/A	#N/A	#N/A	#N/A	#N/A	#N/A	#N/A
P-0039447-T01-IM6	Female	Cutaneous Melanoma	Metastasis	Lung	Lung	IMPACTv6-CLIN-20190145R	55.9	0	1327	Skin, trunk	2	Unknown	0	BRAF_CLASS_1_V600E	0	#N/A	#N/A	#N/A	#N/A	#N/A	#N/A	#N/A	#N/A	#N/A	#N/A	#N/A	#N/A	#N/A	#N/A	#N/A	#N/A	#N/A	#N/A	#N/A	#N/A	#N/A
P-0039629-T01-IM6	Male	Cutaneous Melanoma	Primary	Not Applicable	NA	IMPACTv6-CLIN-20190149	60.1	0	1511	Skin, trunk	2	No	0	NRAS_Q61	0	#N/A	#N/A	#N/A	#N/A	#N/A	#N/A	#N/A	#N/A	#N/A	#N/A	#N/A	#N/A	#N/A	#N/A	#N/A	#N/A	#N/A	#N/A	#N/A	#N/A	#N/A
P-0039787-T01-IM6	Male	Cutaneous Melanoma	Metastasis	Lung	Lung	IMPACTv6-CLIN-20190169	75.2	0	1294	Skin, trunk	2	No	0	BRAF_CLASS_1_V600E	0	#N/A	#N/A	#N/A	#N/A	#N/A	#N/A	#N/A	#N/A	#N/A	#N/A	#N/A	#N/A	#N/A	#N/A	#N/A	#N/A	#N/A	#N/A	#N/A	#N/A	#N/A
P-0040076-T01-IM6	Male	Cutaneous Melanoma	Primary	Not Applicable	NA	IMPACTv6-CLIN-20190183	34	0	677	Skin, trunk	2	No	0	BRAF_CLASS_1_V600E	0	#N/A	#N/A	#N/A	#N/A	#N/A	#N/A	#N/A	#N/A	#N/A	#N/A	#N/A	#N/A	#N/A	#N/A	#N/A	#N/A	#N/A	#N/A	#N/A	#N/A	#N/A
P-0040090-T01-IM6	Female	Cutaneous Melanoma	Metastasis	Lymph Node, Regional	LR / In-Transit / Regional LN	IMPACTv6-CLIN-20190183	26.8	0	7595	Skin, leg/hip	4	Unknown	0	BRAF_CLASS_1_V600E	0	#N/A	#N/A	#N/A	#N/A	#N/A	#N/A	#N/A	#N/A	#N/A	#N/A	#N/A	#N/A	#N/A	#N/A	#N/A	#N/A	#N/A	#N/A	#N/A	#N/A	#N/A
P-0040246-T01-IM6	Male	Melanoma of Unknown Primary	Metastasis	Lung	Lung	IMPACTv6-CLIN-20190193	70.8	0	78	Unknown Primary	8	NA	0	KIT_PDGFRA	0	#N/A	#N/A	#N/A	#N/A	#N/A	#N/A	#N/A	#N/A	#N/A	#N/A	#N/A	#N/A	#N/A	#N/A	#N/A	#N/A	#N/A	#N/A	#N/A	#N/A	#N/A
P-0040265-T01-IM6	Male	Cutaneous Melanoma	Primary	Not Applicable	NA	IMPACTv6-CLIN-20190197	52.9	0	57	Skin, arm/shoulder	3	Yes	0	BRAF_CLASS_1_V600E	0	#N/A	#N/A	#N/A	#N/A	#N/A	#N/A	#N/A	#N/A	#N/A	#N/A	#N/A	#N/A	#N/A	#N/A	#N/A	#N/A	#N/A	#N/A	#N/A	#N/A	#N/A
